# Supplementary material
Source: Research Square preprint supplement (doi:10.21203/rs.3.rs-9436118/v1)
Supplement: Supplementary file 1 [file 2bd914eb3c72c2662655a608.docx]

**Suppl. Material: A compact set of sea star footprint proteins is mediating the adhesion of *Asterina gibbosa***

***Asterina gibbosa* genome annotation**

BUSCO (Benchmarking Universal Single-Copy Orthologs v.6.0.0, dataset metazoan_odb10) analysis revealed 99.7% complete BUSCOs (94% single copy, 5.7% duplicated, 0.1% fragmented and 0.2% missing). The final structural annotation contained 60,779 gene features, 43,669 mRNA features, 224,209 CDS features, 17,110 tRNA features, and 0 rRNA features. Based on mRNA-parent relationships, 43,669 genes were classified as protein-coding (43,669 protein-coding transcripts). Among protein-coding transcripts, 23,438 (53.67%) had PFAM annotations, 461 (1.06%) had CAZy annotations, and 926 (2.12%) had MEROPS annotations. At gene level, 23,438 genes carried PFAM terms, 461 carried CAZy terms, and 926 carried MEROPS terms. The final annotation included 7,091 unique PFAM accessions, 92 unique CAZy accessions, and 449 unique MEROPS accessions.

**
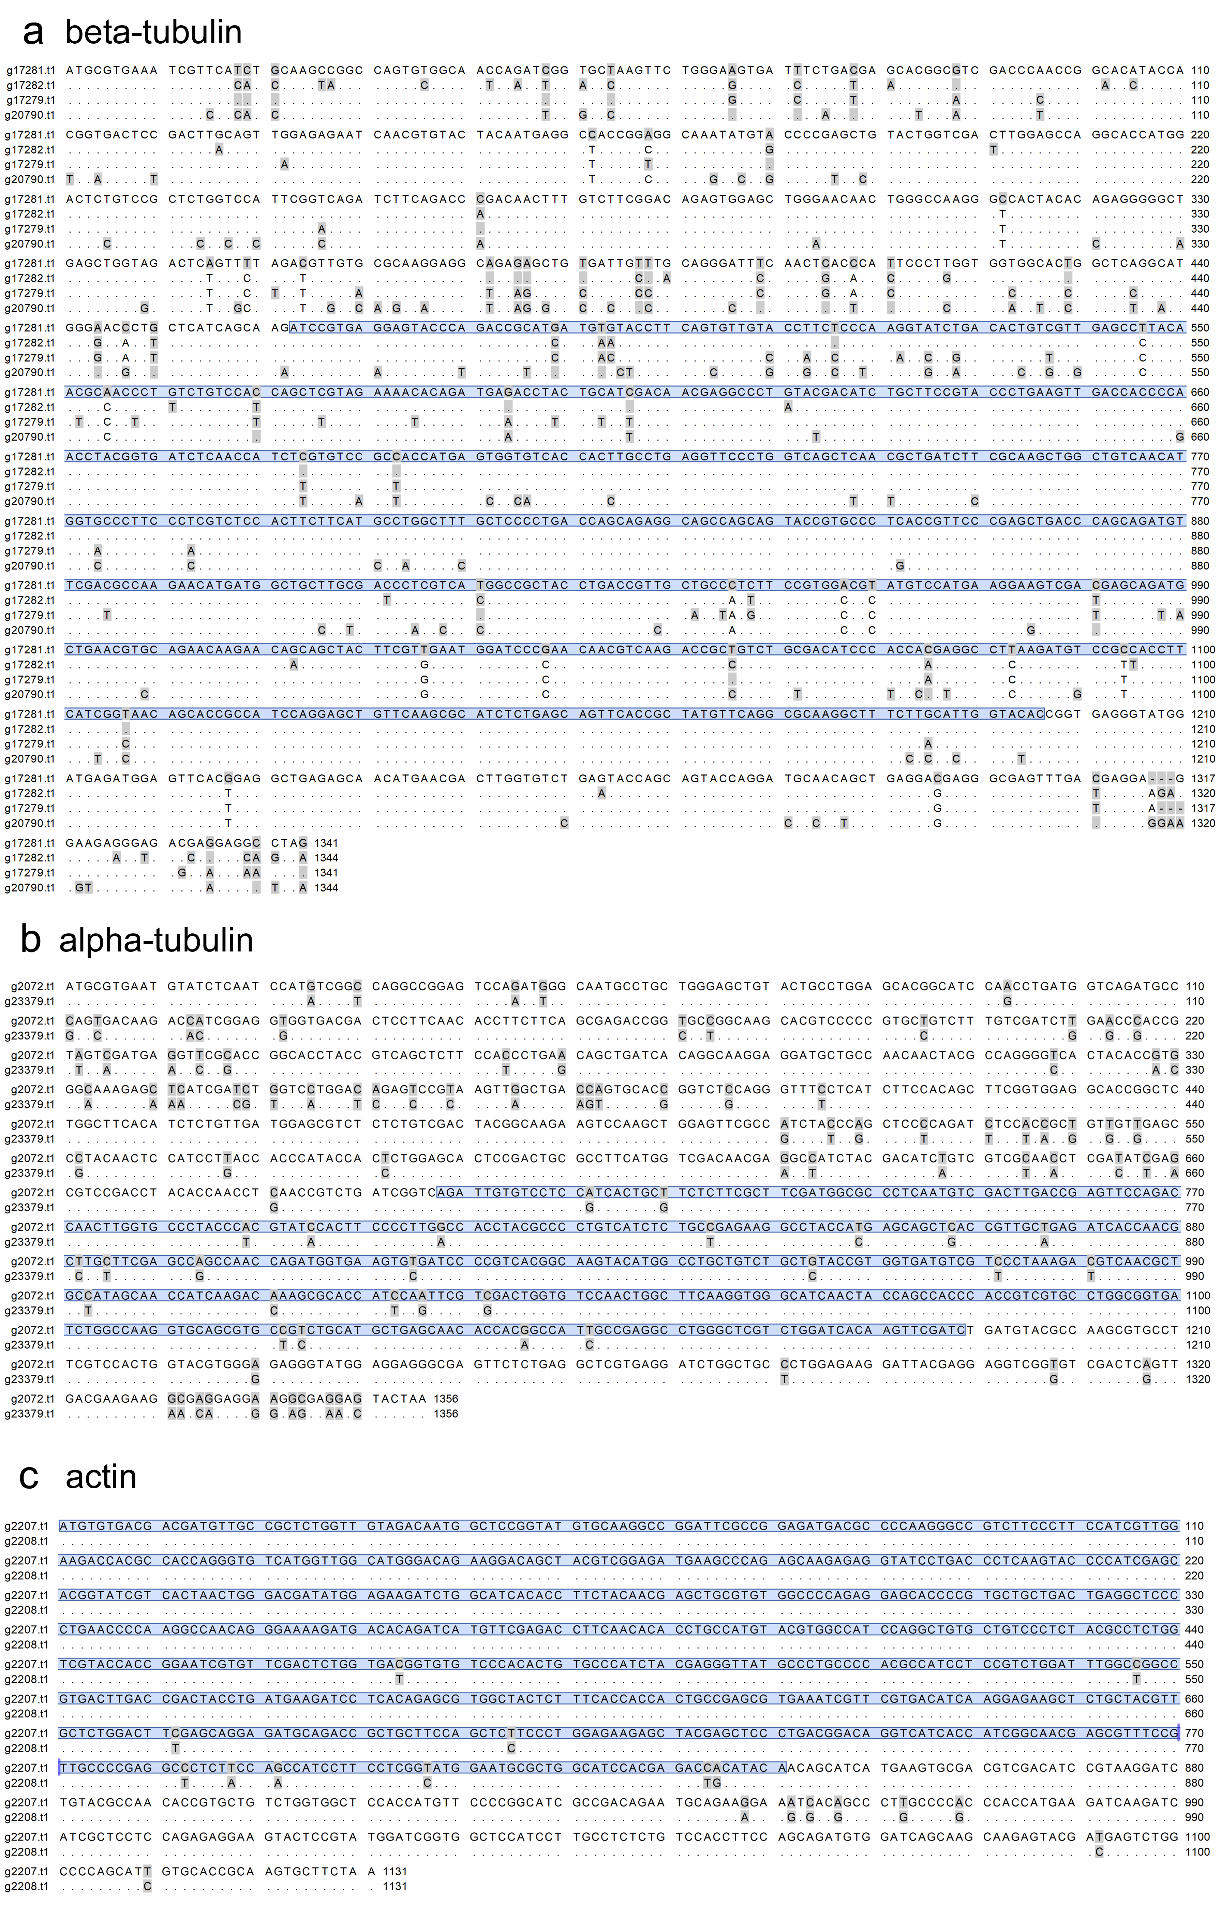
**

**Suppl. Fig. 1: Alignments of beta-tubulin, alpha-tubulin and actin sequences.** Region of ISH probes are highlighted in blue, mismatches are highlighted in grey. ISH probes detect all sequences.

**Confirmation of Sfp sequences and manual curating**

To validate Agib-Sfp sequences, several PCR products were subjected to Sanger sequencing. For instance, the Agib-Sfp7 transcript was found to be 1344 bp shorter than the predicted gene sequence (g22446.t1). In contrast, the gene coding for Agib-Sfp9 (g820.t1) was initially predicted too short, missing the correct end. Alignment with the transcriptome sequence (Unigene11005_AG_TF1) revealed the correct sequence end, which was subsequently confirmed through Sanger sequencing (see Suppl. Fig. 2). Similarly, genes coding for Agib-Sfp10 (g1515.t1) and Agib-Sfp13 (g1514.t1) were determined to be 30 bp longer than predicted. The predicted protein sequence of Agib-Sfp12 (g1518.t1) lacked a signal peptide, and Sanger sequencing revealed a different sequence at the 5’ end. However, the corrected sequence did not encode for a start codon, and the precise start of the gene could not be determined.


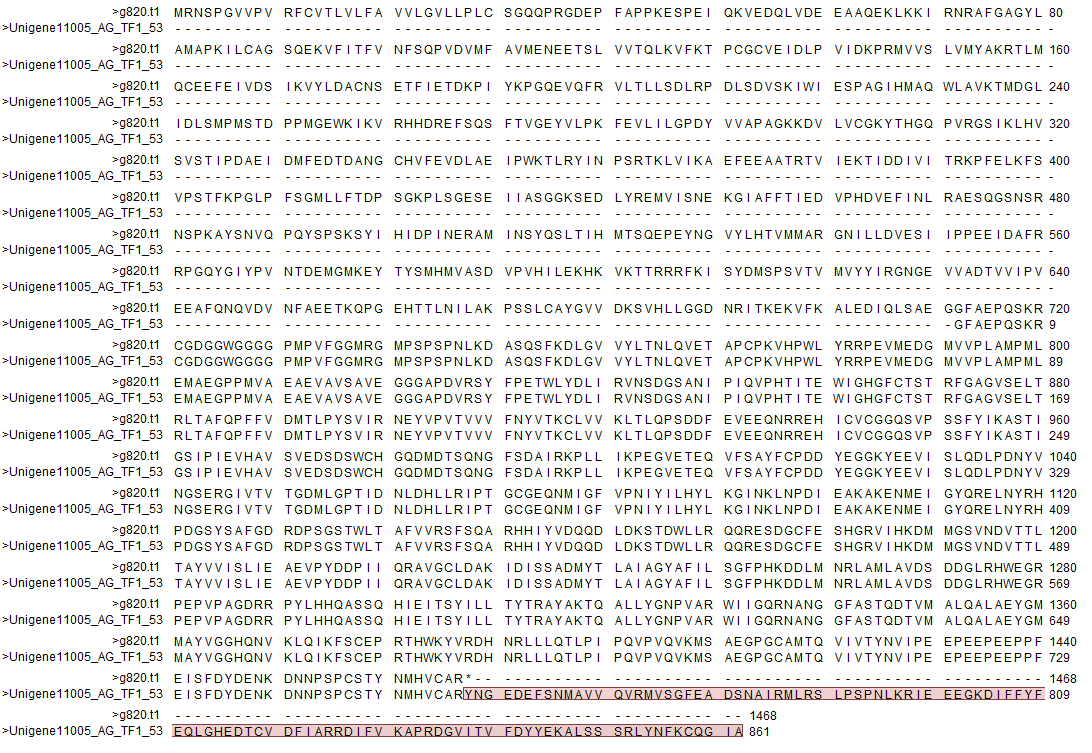


**Suppl. Fig. 2: Alignment of Sfp9 protein sequences: protein predicted based on genome sequence g820.t1 and transcriptome sequence Unigene11005_AG_TF1.** Correct end is highlighted in red.

**Search for missing *A. rubens* Sfp homologs in *A. gibbosa***

**
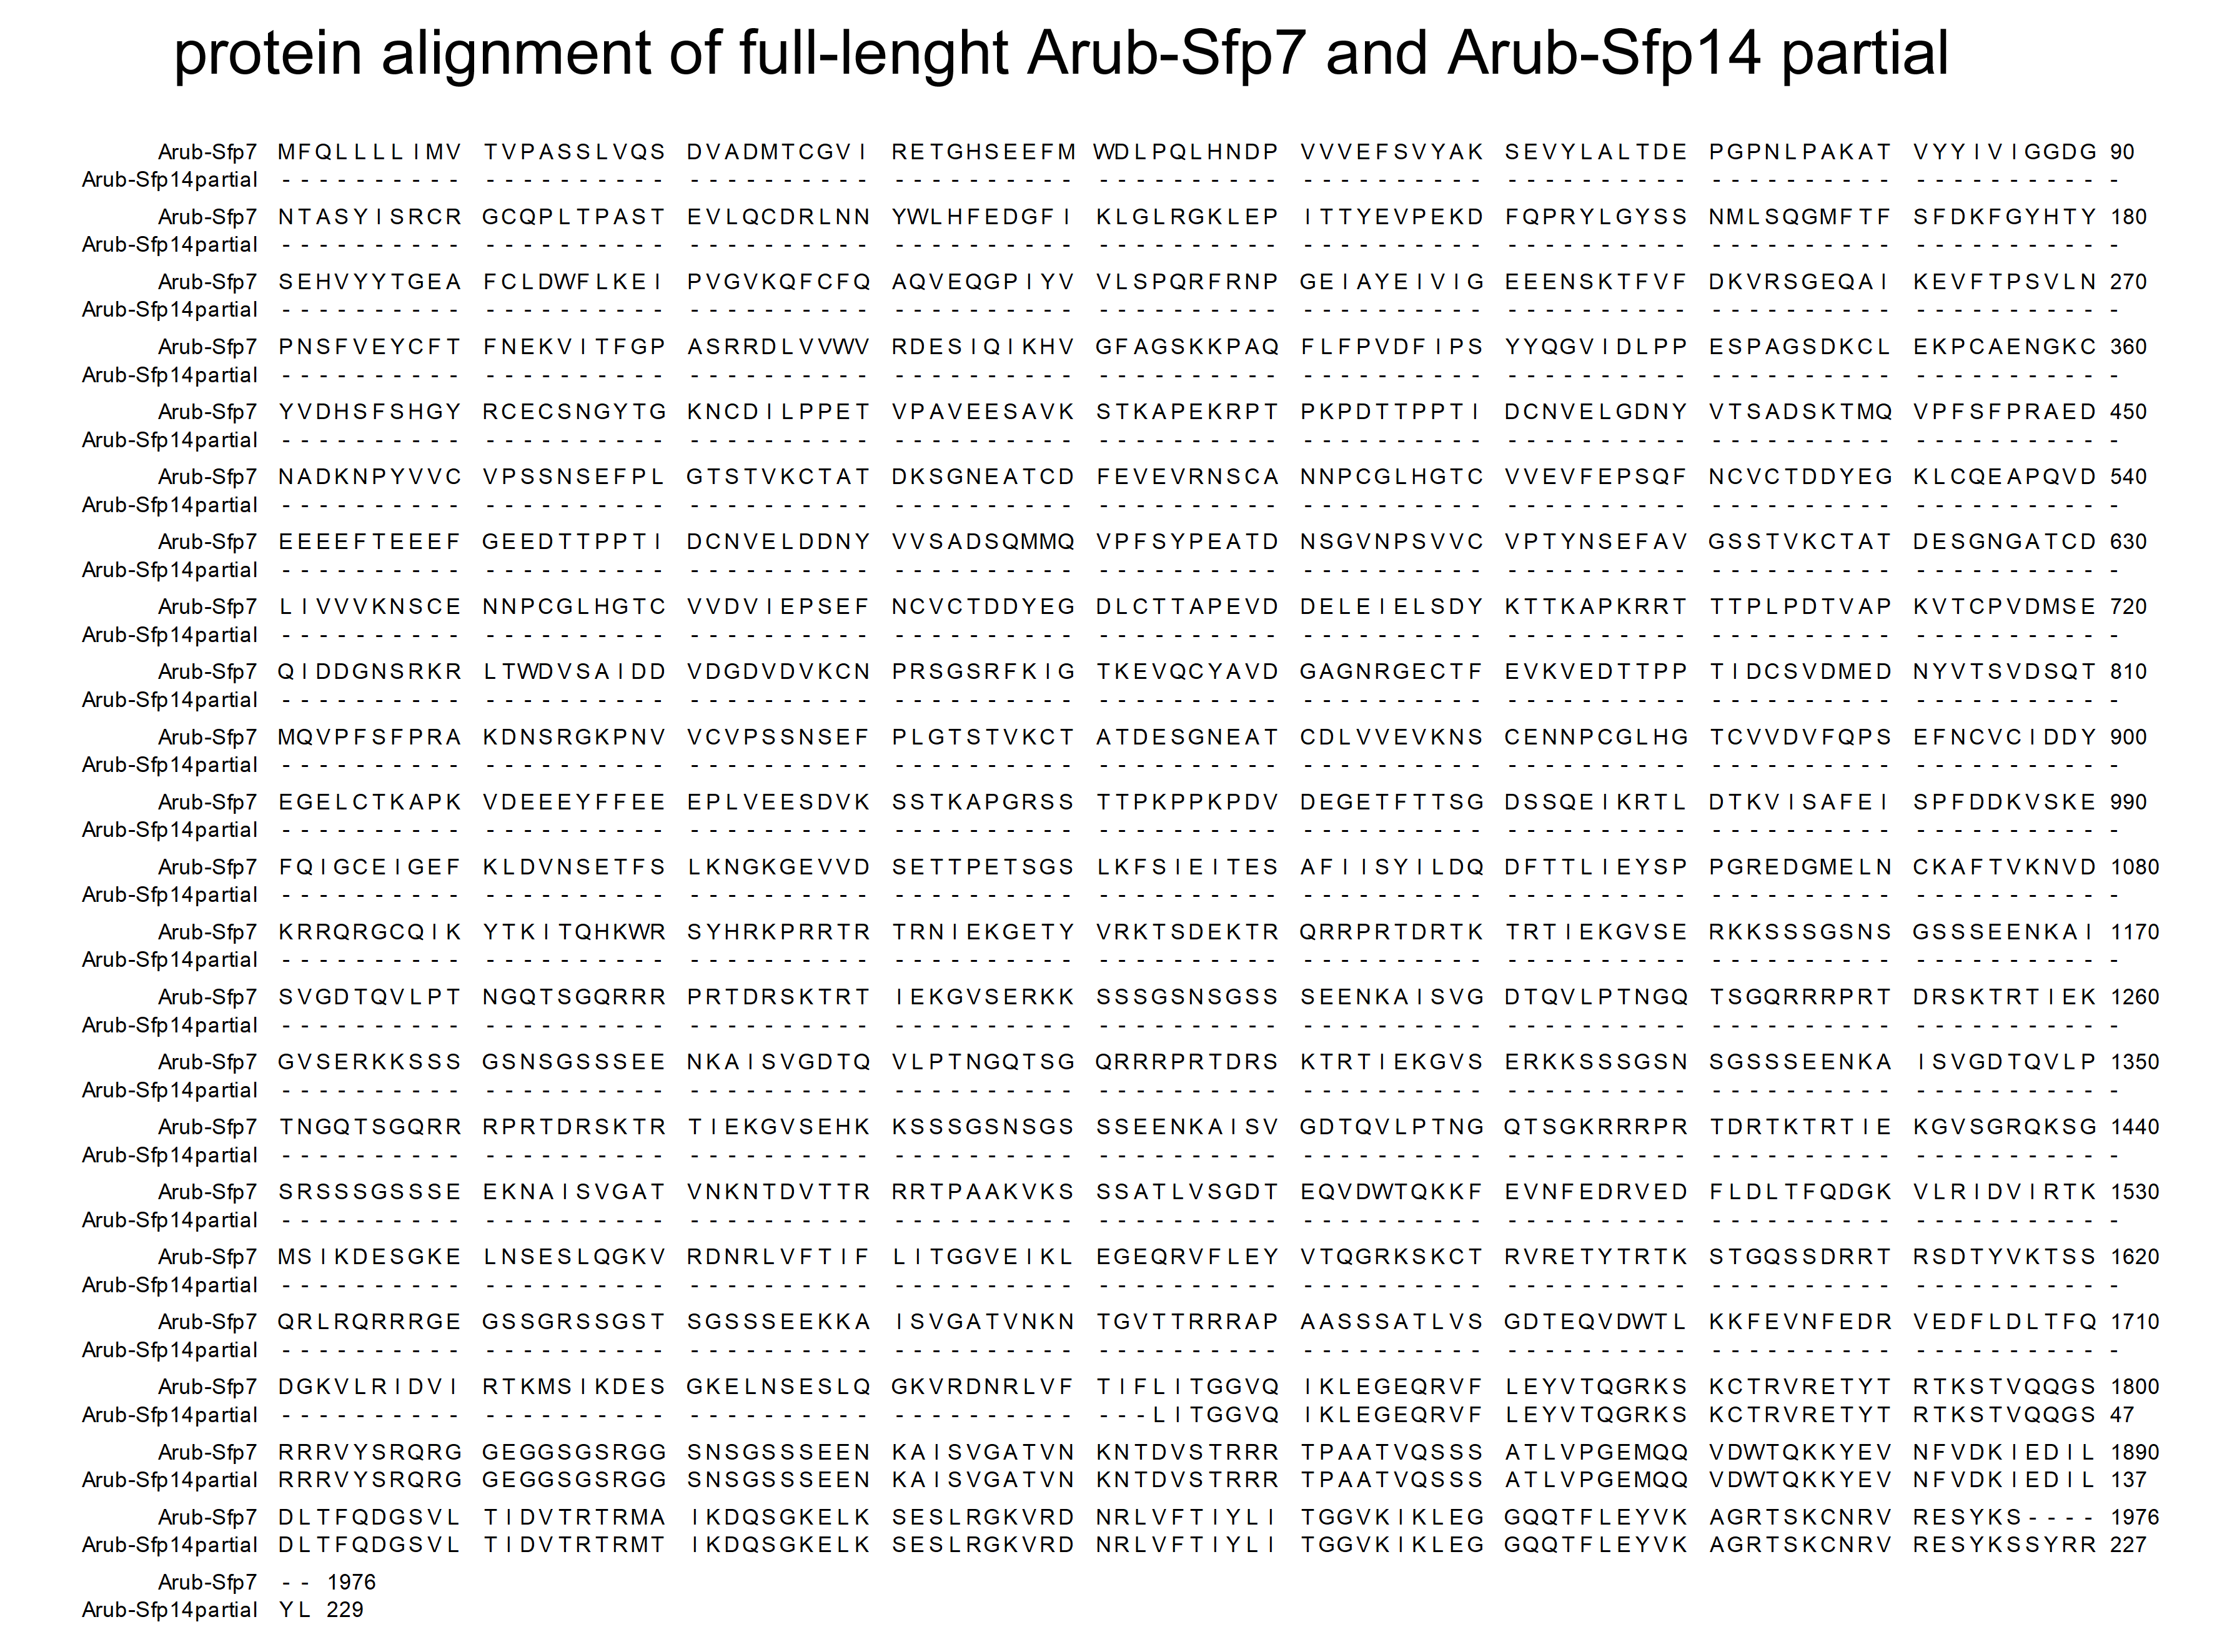
Suppl. Fig. 3: Protein alignment of the predicted full-length Arub-Sfp7 and Arub-Sfp14 partial sequence.** The new genomic analysis of *Asterias rubens* revealed that the formerly separated partial sequences of Arub-Sfp7 and Arub-Sfp14 are part of one protein, with Arub-Sfp14 being at the end of Arub-Sfp7.

The *A. rubens* Sfp6 protein is characterized by a domain of predicted disorder followed by 11 repetitive vWF C domains. BLAST searches against *A. gibbosa* genome and predicted proteins retrieved no protein with a similar domain architecture. Among the best hits from the BLAST search was g17264.t2 which encodes a large 4361 aa protein with repetitive vWF C domains. The expression of g17264.t2 was restricted to single cells in the connective tissue of the tube foot stem (Suppl. Fig. 4a). The *A. rubens* Sfp15 protein is 170 aa small and contains one WAP and two antistasin domains. In *A. gibbosa* the best blast hit was g7833.t1 (99% query coverage, e-value: 1.59x10-37, and 47.2% identity), followed by the sequence encoding for Agib-Sfp8 (82% query coverage, e-value: 4.88x10-25, and 37.1% identity). The sequence g7833.t1 encodes for a much larger protein of 1406 aa, however its expression could not be determined as PCR amplification failed. For the astacin-like Sfp, ISH probes against the two best BLAST hits g14405.t1 (99% query coverage, e-value: 9.37x10-132, and 48% identity) and g12320.t1 (97% query coverage, e-value: 2.89x10-180, and 45% identity) were made. The mRNA of g14405.t1 was expressed in the stem and restricted areas of the adhesive epidermis (Suppl. Fig. 4b) and g12320.t1 showed no detectable expression in tube feet (Suppl. Fig. 4c).

**
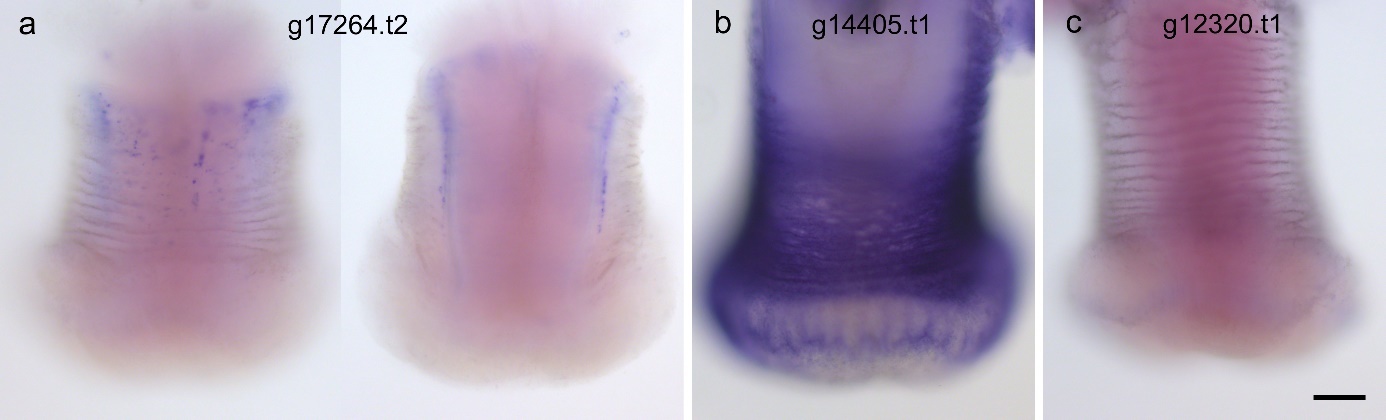
**

**Suppl. Fig. 4: ISH pattern of sequences with the highest similarity to *A. rubens* Sfps in *A. gibbosa* tube feet.** (a) The ISH probe against g17264.t2 (similar to Sfp6) stained single cells in the connective tissue, images show the same tube foot at different focus planes. (b) g14405.t1 ISH probe (similar to astacin-like Sfp) stained the stem and longitudinal regions of the adhesive epidermis. (c) g12320.t1 (similar to astacin-like Sfp) led to no detectable staining in *A. gibbosa* tube feet. Scale bar 100 µm.

**Material and methods: antibody staining of footprints**

Footprints were obtained by placing individual *A. gibbosa* on clean glass slides. The glass slides were moved through ASW to mimic water currents, forcing the sea stars to attach strongly. After a rinse with distilled water, the footprints were fixed in 4% (w/v) paraformaldehyde PFA in in phosphate-buffered saline (PBS) solution for 1 hour at room temperature. After several washing steps in Tris buffered saline (25 mmol l/L Tris, 125 mmol l/L NaCl, pH 8.0) containing 0.05% (v/v) Tween20 (TBS-T) the footprints were blocked in TBS-T containing 3% (w/v) bovine serum albumin for at least 1 h at 4°C. The antibodies were diluted (1:50 for anti-Agib-Sfp7 and 1:100 for anti-Agib-Sfp8) in blocking solution containing 25 µg/ml biotinylated ConA (Vector Labs) and added to the footprints overnight at 4°C. After several washing steps in TBS-T a goat-anti-rabbit-FITC antibody diluted 1:100 and Streptavidin-Texas red (Vector Labs) diluted 1:500 in blocking solution were applied for 1 hour at room temperature. After several washing steps in TBS-T, the footprints were mounted in Vectashield® (Vector Labs) and analysed with a Leica DM5000 microscope.

**Mass spectrometry analysis**

Briefly, tryptic peptides were analysed by reverse-phase HPLC-ESI-MS/MS using an Eksigent Ultra Plus 400 nano-LC 2D HPLC system connected to a quadrupole time-of-flight Triple TOF 6000 mass spectrometer (AB Sciex, Condord, ON). After injection peptide mixtures were transferred onto an AB Sciex column 3C18-CL 75µm x 15 cm and eluted at a flow rate of 300 nl/min. MS data acquisition was performed with a Triple TOF 6000 System (AB SCIEX, Condord, ON) fitted with a Nanospray III source (AB SCIEX, Condord, ON) and a pulled quartz tip as the emitter (New Objectives). MS/MS data were searched for protein candidates against all predicted proteins of *Asterina gibbosa* using the software ProteinPilot 5.0 (Sciex, Singapore). Carbamidomethyl cysteine was set as fixed modification, Iodoacetamide for amino acid substitution and trypsin as digestive enzyme. For all samples candidates with false discovery rates (FDR) above 0.01 were excluded from further analyses. The mass spectrometry proteomic raw data as well as search results have been deposited to the ProteomeXchange Consortium ([http://proteomecentral.proteomexchange.org](http://proteomecentral.proteomexchange.org/)) via the PRIDE partner repository with the dataset identifier (*pending*). Sequences that were identified with at least three peptides in the individual samples were compiled to form a single set of 34 candidate sequences.

**Protein extraction and Western blotting**

Tube feet were rapidly dissected from one sea star and immediately frozen in liquid nitrogen. Freeze-dried tube feet samples were homogenized in 800 µl HEPES lysis buffer (with protease inhibitors (Halt Protease Inhibitor Cocktail, Fisher Scientific). Per sample 7 glass beads were added and homogenization was performed in a Bertin Precellys Evolution homogeniser with the settings 5000 rpm for two times 15 seconds. The homogenised tissue was transferred to a new precooled 1.5 microcentrifuge tube and centrifuged at maximum speed for 10 min at 4°C. Supernatant was transferred to a new tube, with the pellet being discarded. Protein concentration was quantified using the Pierce 660 nm Protein Assay (Thermo Scientific) and BSA standards (Thermo Scientific) and measured on a Nanodrop2000c. Proteins were diluted in 4XLaemmli buffer (Bio-Rad) and 5 µl were loaded onto a Criterion TGX stain-free gel (Bio-Rad). Precision Plus Protein™ All Blue Standard (Bio-Rad) was used as a marker. The gel was run with a Bio-Rad PowerPac using the Tris-glycine program 110 V for 90 min. Semi-dry blotting was performed with a Bio-rad Trans-Blot Turbo system to a PVDF membrane with 25V and 1A for 30 min.

Afterwards the membrane was washed in 1xTBS-T and blocked with 5% milk powder in TBS-T overnight at 4°C. Then the membrane was incubated in 1:5000 diluted antibody in 5% milk powder in TBS-T for 1 hour at RT, followed by several washing steps in 1xTBS-T. Then the membrane was incubated in 1:10000 diluted secondary antibody (mouse-anti-rabbit-HRP) for one hour at RT, followed by several washing steps in 1xTBS-T. For detection, the ECL SelectTM Western Blotting Detection Reagent (GE Healthcare) was used. After incubation for five minutes the membrane was exposed in a ChemiDoc XRS (Bio-Rad) for image capture.


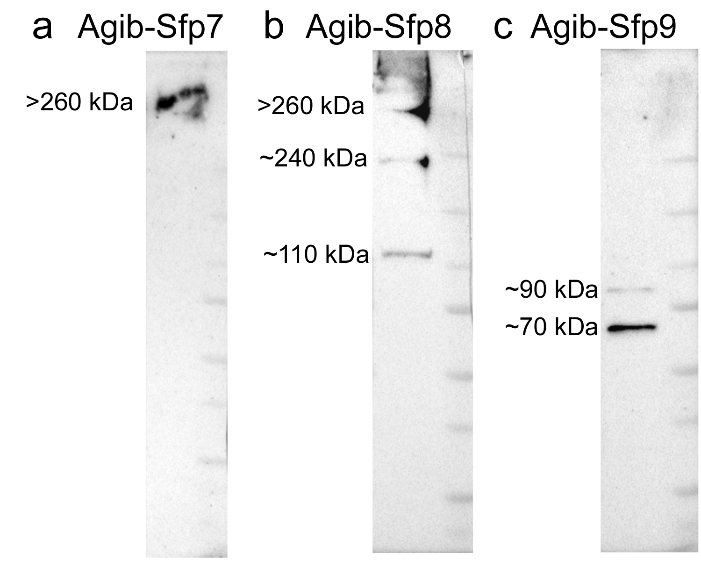


**Suppl. Fig. 5: Western blot analysis of Sfps in *A. gibbosa* tube feet.** Western blots of tube feet protein extracts immunolabelled with polyclonal antibodies raised against peptides of (a) Agib-Sfp7, (b) Agib-Sfp8, and (c) Agib-Sfp9.

**Discussion**

**Collinearity analysis of Sfps between *A. gibbosa* and *A. rubens***

***
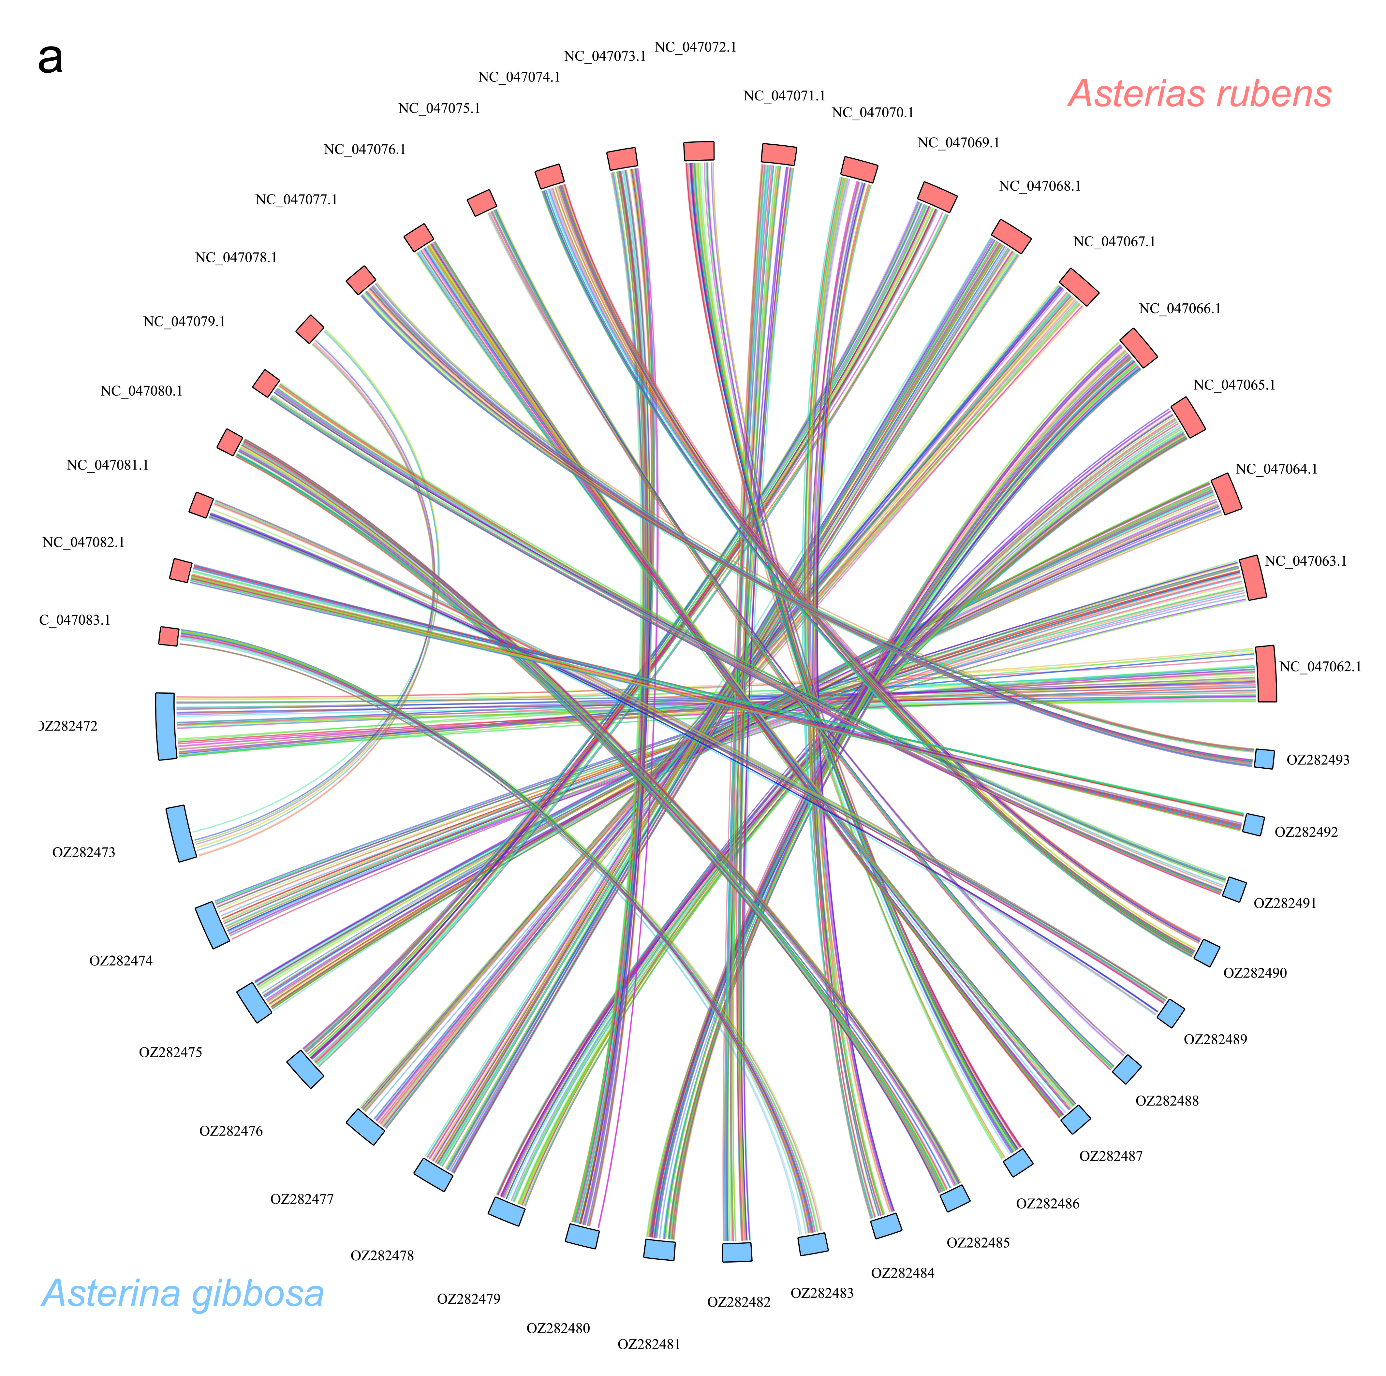
***

***
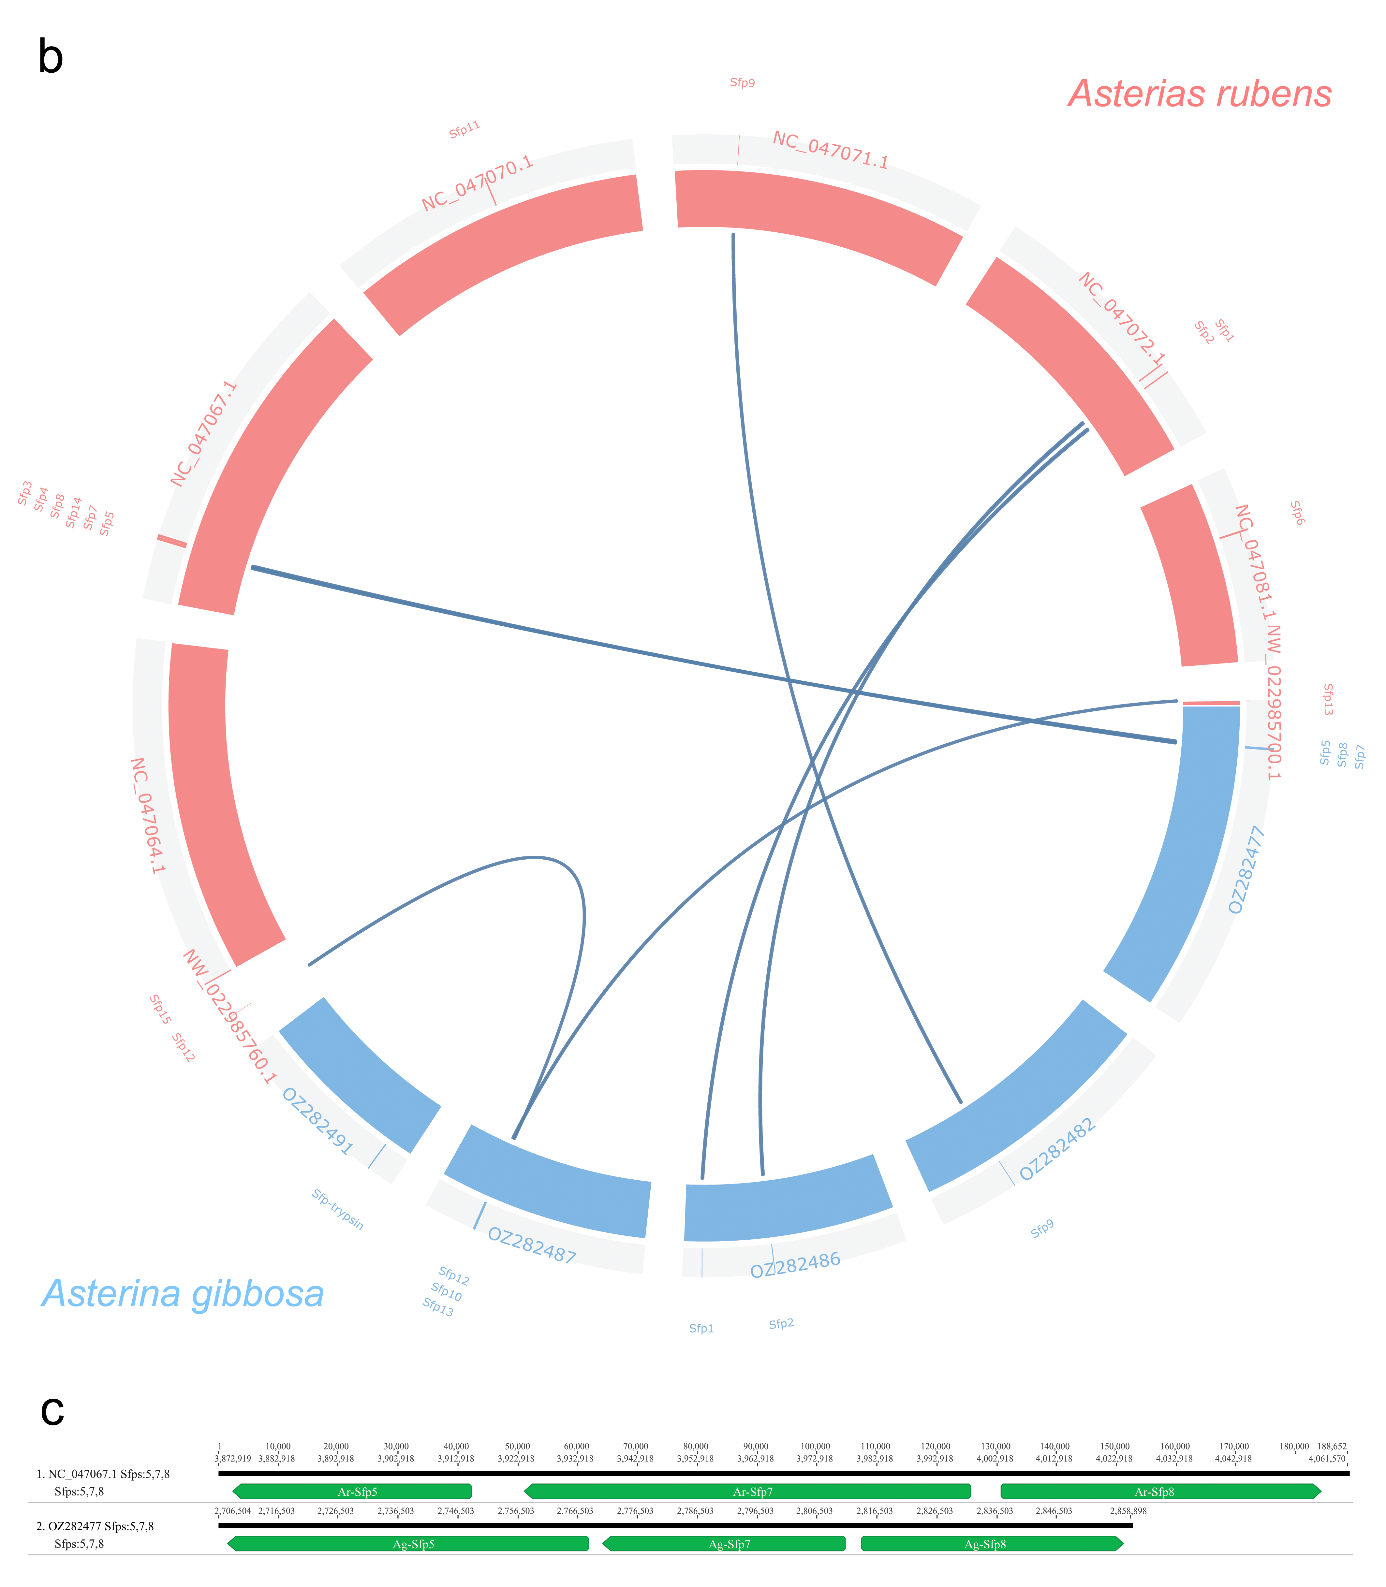
***

**Suppl. Fig. 6: Collinearity between *Asterias rubens* and *Asterina gibbosa* and gene cluster of Sfp5, Sfp7, and Sfp8.** (a) Collinearity between the two species, numerous intrachromosomal rearrangements are present, but interchromosomal rearrangements are absent. (b) Collinearity of Sfps between *A. rubens* and *A. gibbosa*. (c) Position and orientation of the coding regions of Sfp5, Sfp7, and Sfp8 resemble each other in the genome of *Asterias rubens* (NC_047067.1) and *Asterina gibbosa* (OZ282477).

**Conservation and divergence of Sfps between *Asterina gibbosa* and *Asterias rubens***

**
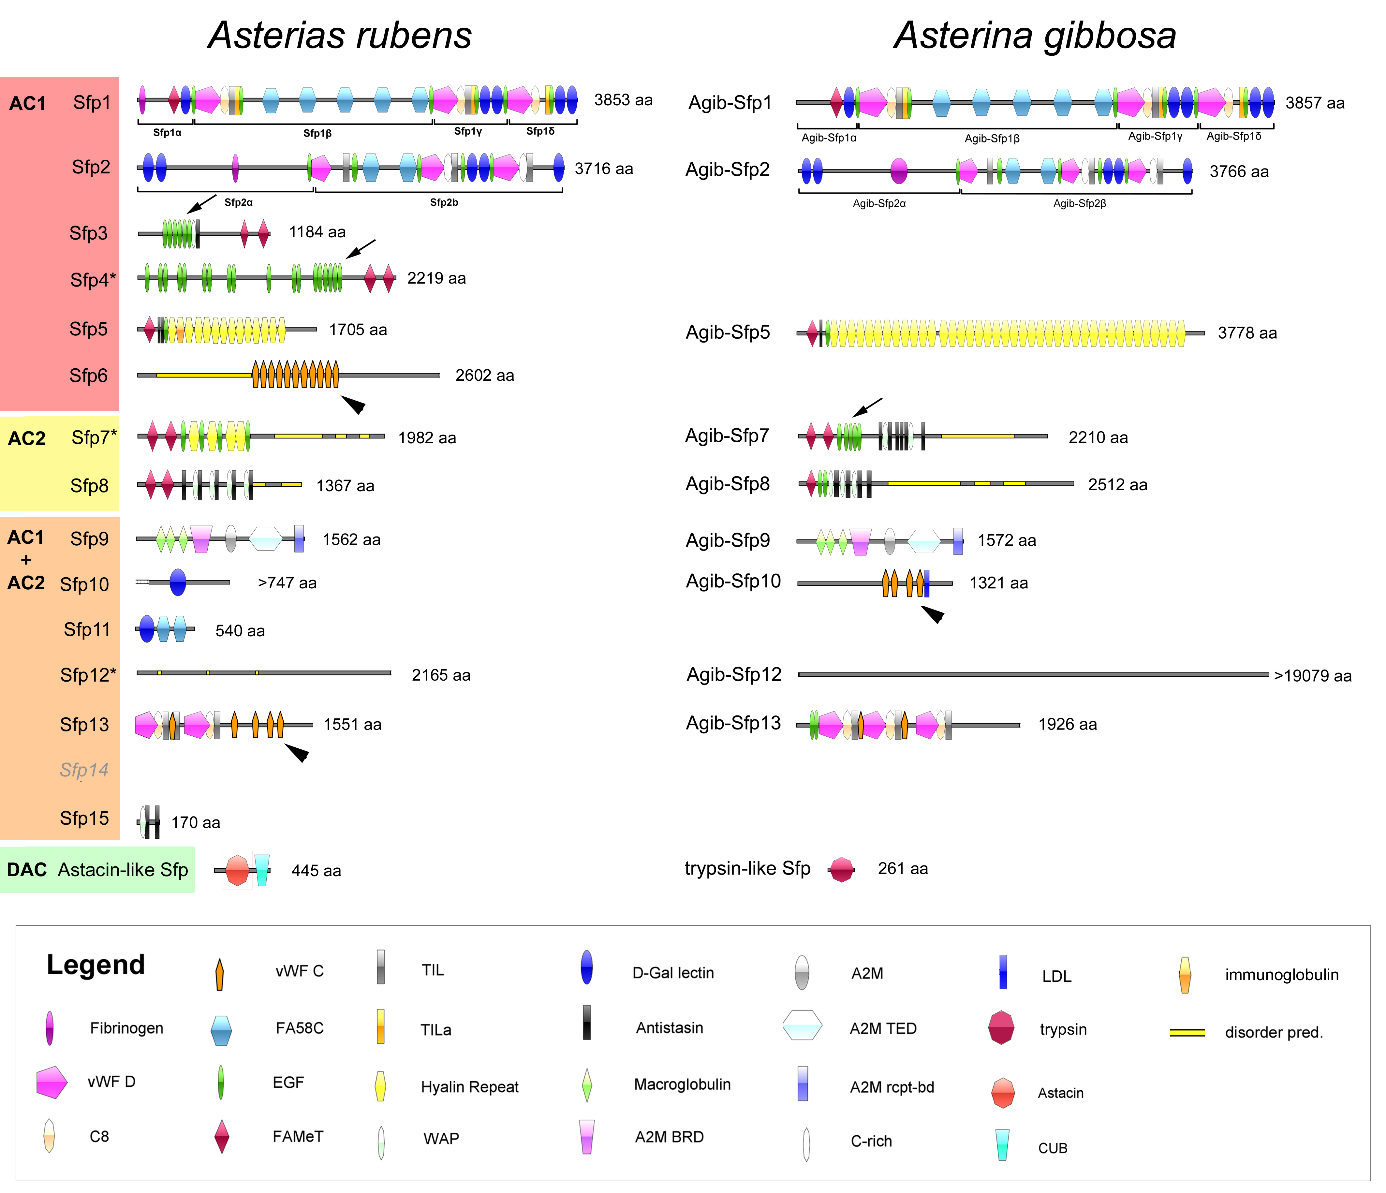
**

**Suppl. Fig. 7: Predicted Sfp protein structures of *Asterias rubens* and *Asterina gibbosa*.** Schematic protein domain drawings from *Asterias rubens* modified after8. Asterisks indicate formerly incomplete sequences that were redrawn with the predicted full-length sequences. Sfp14 was formerly described as a separate protein, but based on the full-length predictions is part of Sfp7. Note that Sfp1, Sfp2 and Sfp9 are highly conserved between the two species. Arrows highlight EGF-like domains and arrowheads van Willebrand facture type C domains.

Abbreviations: A2M, alpha-2-macroglobulin; A2M BRD, alpha-2- macroglobulin bait region domain; A2M rcpt-bd, alpha-2-macroglobulin receptor-binding domain; A2M TED, alpha-macroglobulin-like thioester domain; C8, domain of eight conserved cysteine residues; disorder pred., areas of predicted disorder with no stable secondary structure; D-Gal lectin, D-Galactose binding lectin domain; EGF, epidermal growth factor-like domain; FAMeT, Farnesoic acid O-methyltransferase domain; FA58C, coagulation factor 5/8 type C-terminal domain; LDL, low-density lipoprotein domain; TIL/TILa, trypsin inhibitor-like cysteine-rich domain; vWF C, von Willebrand factor type C domain; vWF D, von Willebrand factor type D domain; WAP, whey acidic protein domain.

**Functional insights into Sfps across the two sea star species**


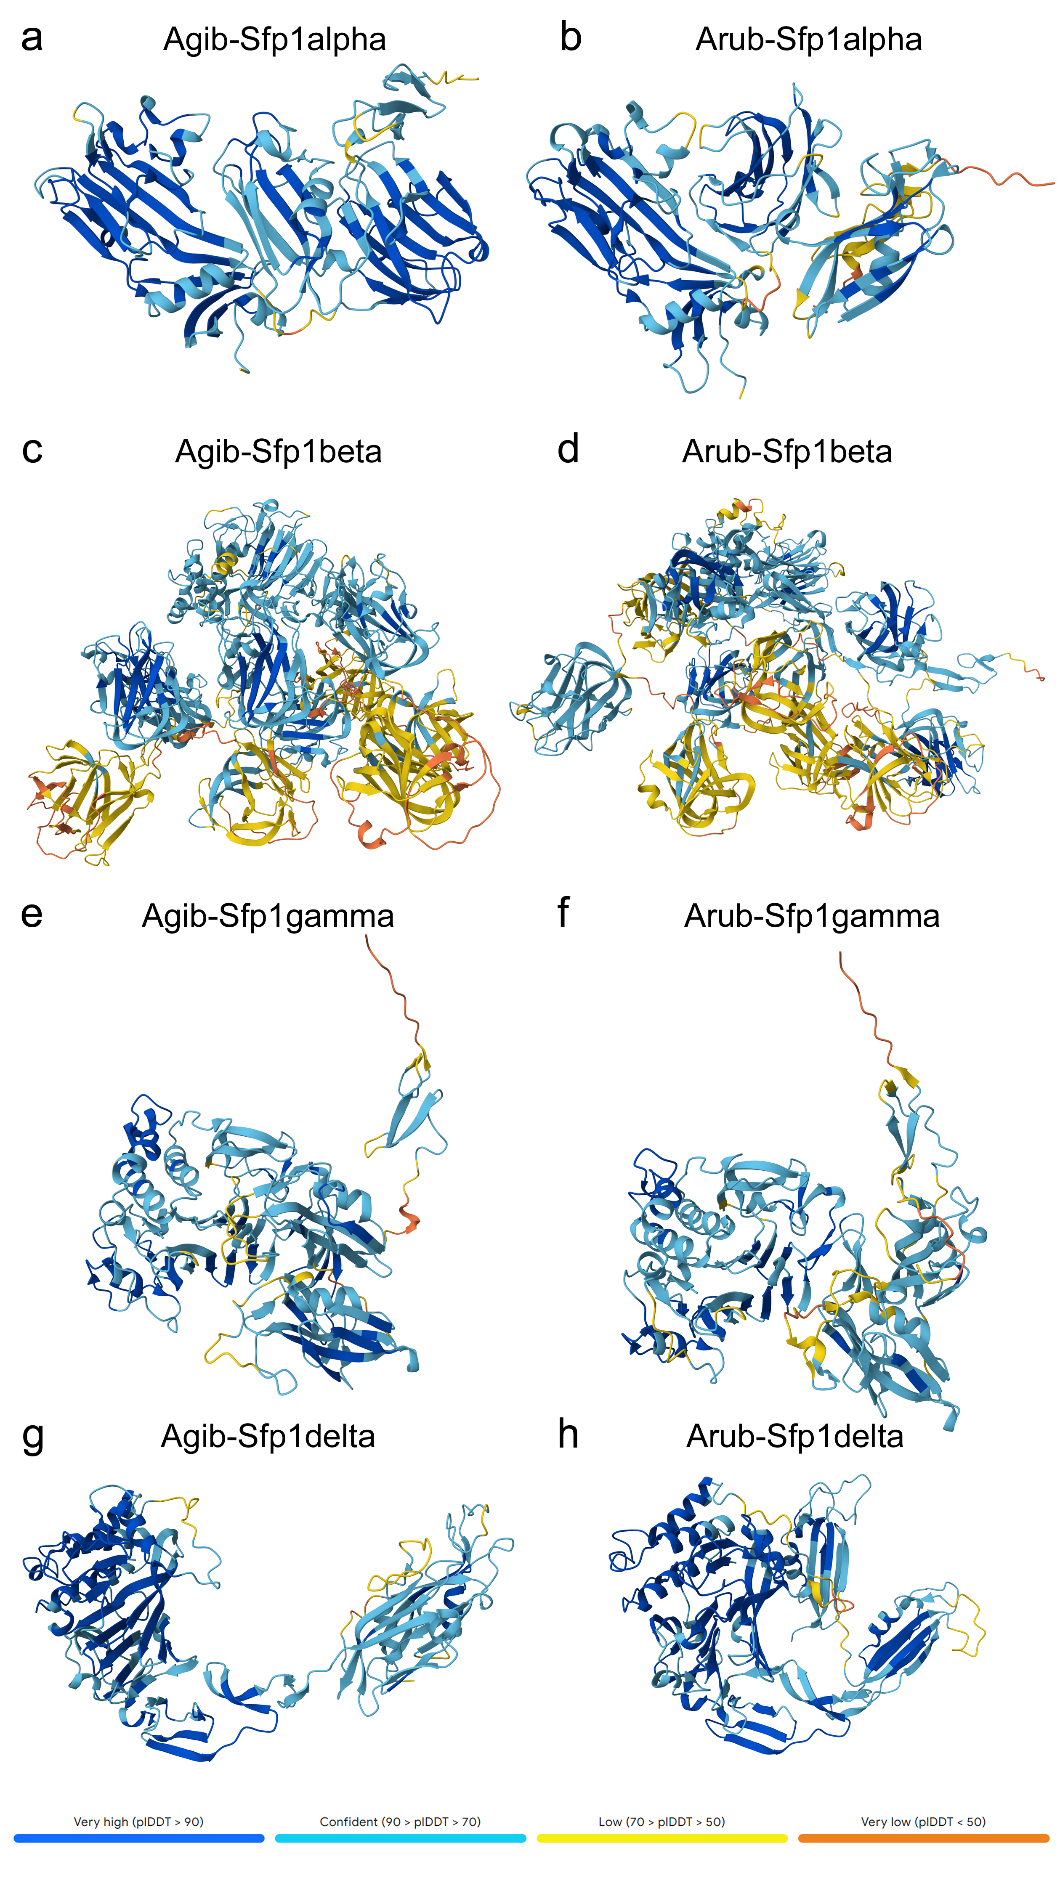


**Suppl. Fig.8: Predicted protein structures of *Asterina gibbosa* and *Asterias rubens* Sfp1 fragments.** AlphaFold structure predictions of (a) Agib-Sfp1alpha, (b) Arub-Sfp1alpha, (c) Agib-Sfp1beta, (d) Arub-Sfp1beta, (e) Agib-Sfp1gamma, (f) Arub-Sfp1gamma, (g) Agib-Sfp1delta, (h) Arub-Sfp1delta.

**
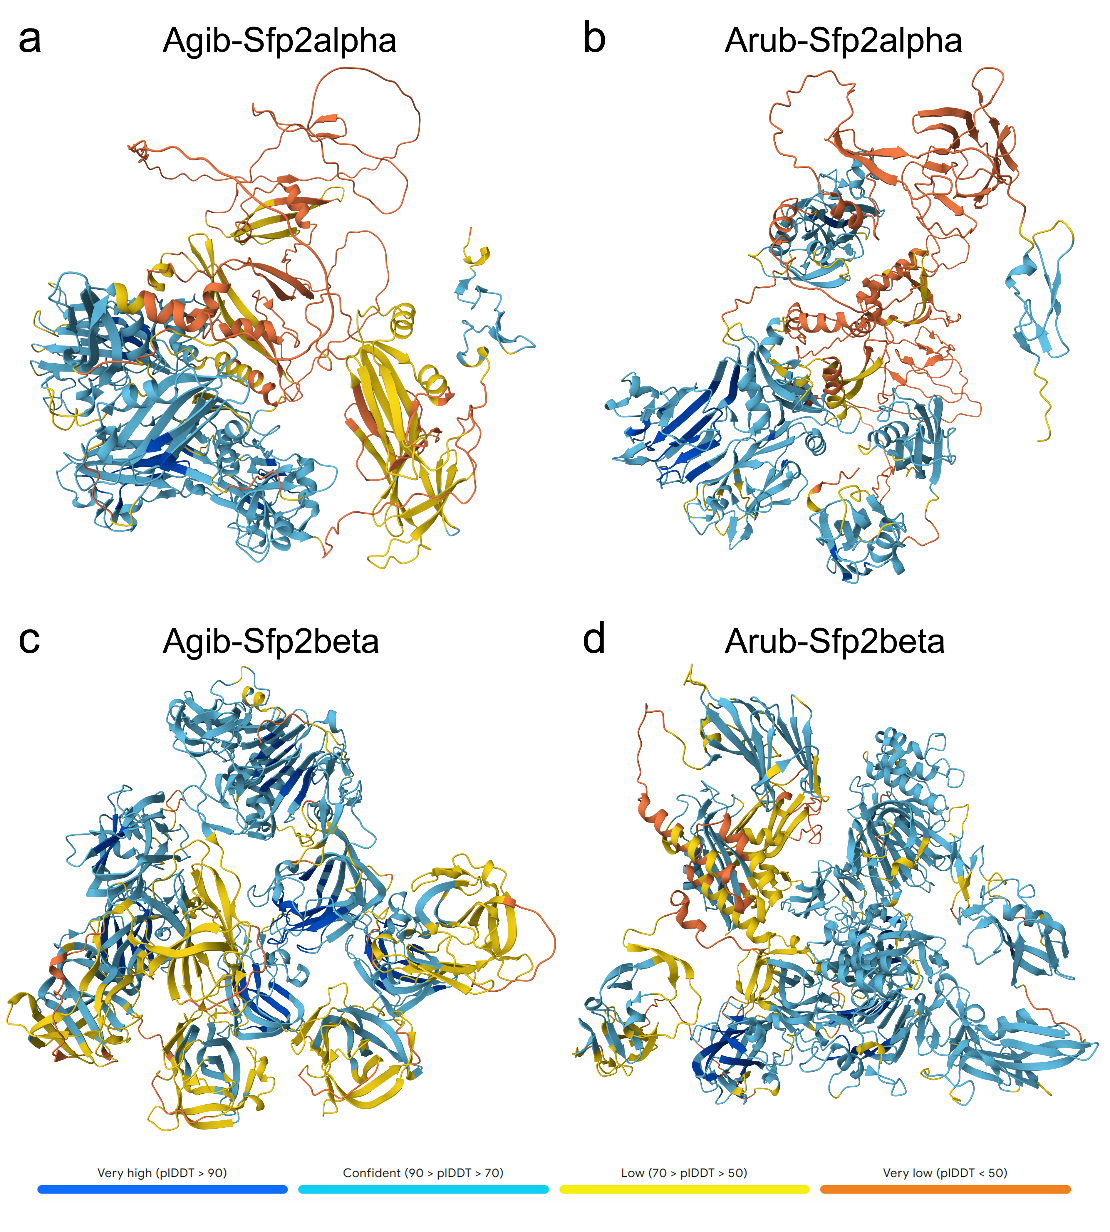
**

**Suppl. Fig. 9: Predicted protein structures of *Asterina gibbosa* and *Asterias rubens* Sfp2 fragments.** AlphaFold structure predictions of (a) Agib-Sfp2alpha, (b) Arub-Sfp2alpha, (c) Agib-Sfp2beta, (d) Arub-Sfp2beta.


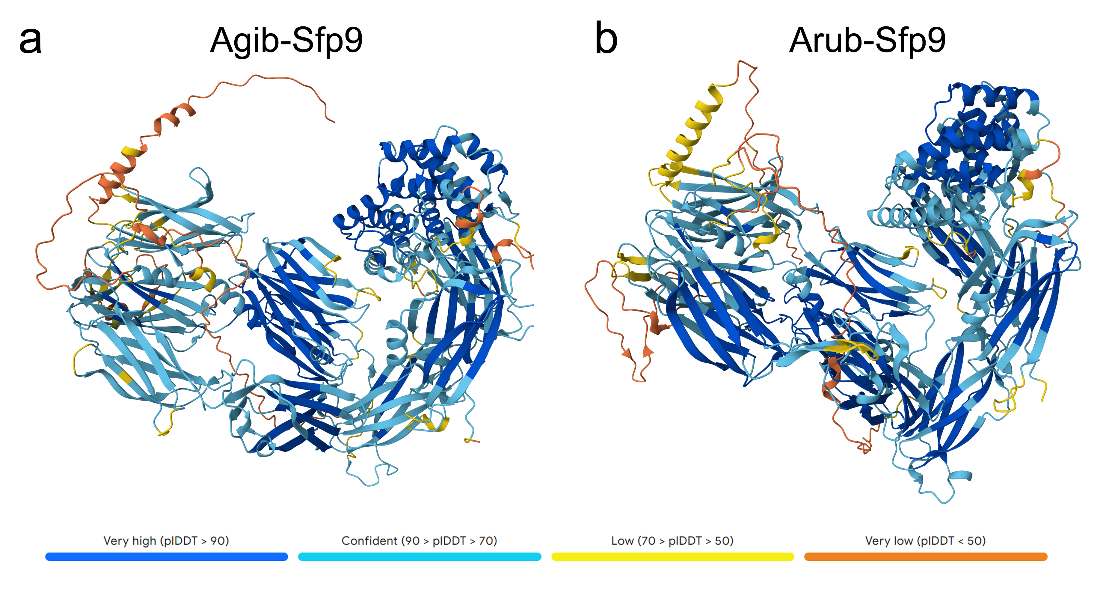


**Suppl. Fig. 10: Predicted protein structures of *Asterina gibbosa* and *Asterias rubens* Sfp9.** AlphaFold structure predictions of (a) Agib-Sfp9, (b) Arub-Sfp9.

Sfp5 of both species form long flexible proteins with repetitive hyaline domains (Suppl. Fig. 12), but Agib-Sfp5 is remarkably larger (40 hyaline repeats) than its *A. rubens* counterpart (13 hyaline repeats). Hyaline repeats are known to mediate cell-adhesion and to be part of the extracellular matrix scaffold33. Likewise, Sfp5 could promote the adhesion to the cells of tube feet and with its negative charge may additionally facilitate interactions with the positively charged surface binding proteins Sfp7 and Sfp8.

**
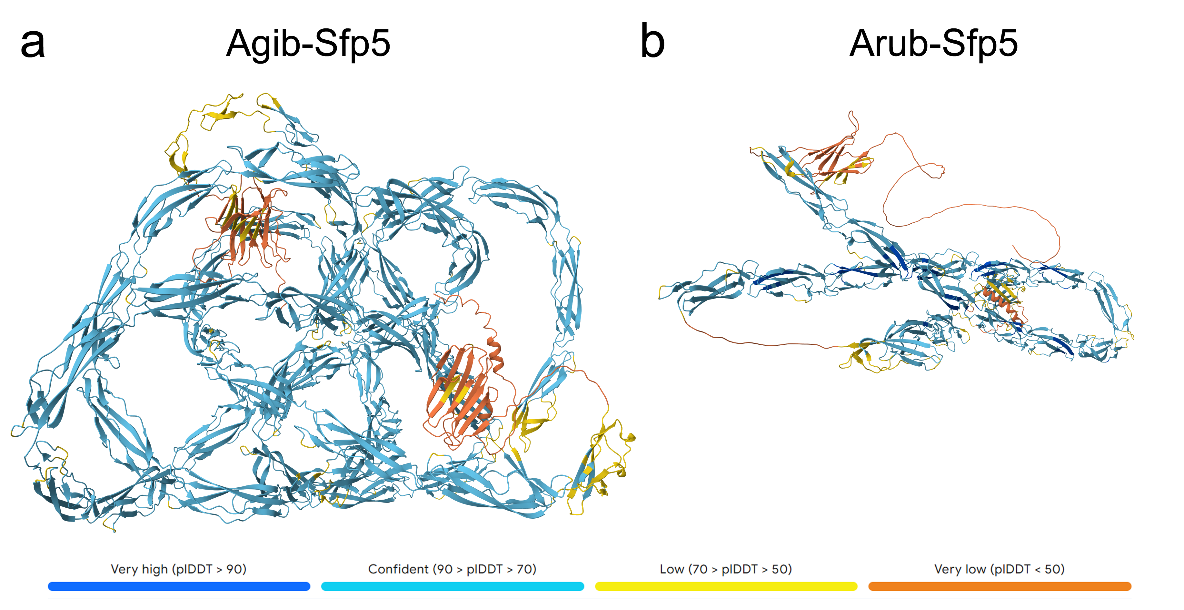
**

**Suppl. Fig. 11: Predicted protein structures of *Asterina gibbosa* and *Asterias rubens* Sfp5.** AlphaFold structure predictions of (a) Agib-Sfp5, (b) Arub-Sfp5.

Agib-Sfp13 is notable for its multiple vWF D domains, a feature it shares with Agib-Sfp1 and Agib-Sfp2. Similarly, Agib-Sfp10 contains multiple vWF C domains. Given their domain architecture and predicted protein structure (Suppl. Fig. 13 a-d), Sfp10 and Sfp13 likely contribute to matrix cohesion.

Agib-Sfp12, the largest protein identified in this study, is highly repetitive and contains no annotated functional domains. Protein structure prediction of the full length Agib-Sfp12 failed due to its large size, the prediction of the first 4000 aa revealed β-sheet rich clusters and disordered regions (Suppl. Fig. 13e). Arub-Sfp12 was predicted to have disordered segments, interrupted by some smaller clusters of β-sheet-like regions and one long strand of β-sheet-like repeats, though with only low to intermediate confidence (Suppl. Fig. 13f).

**
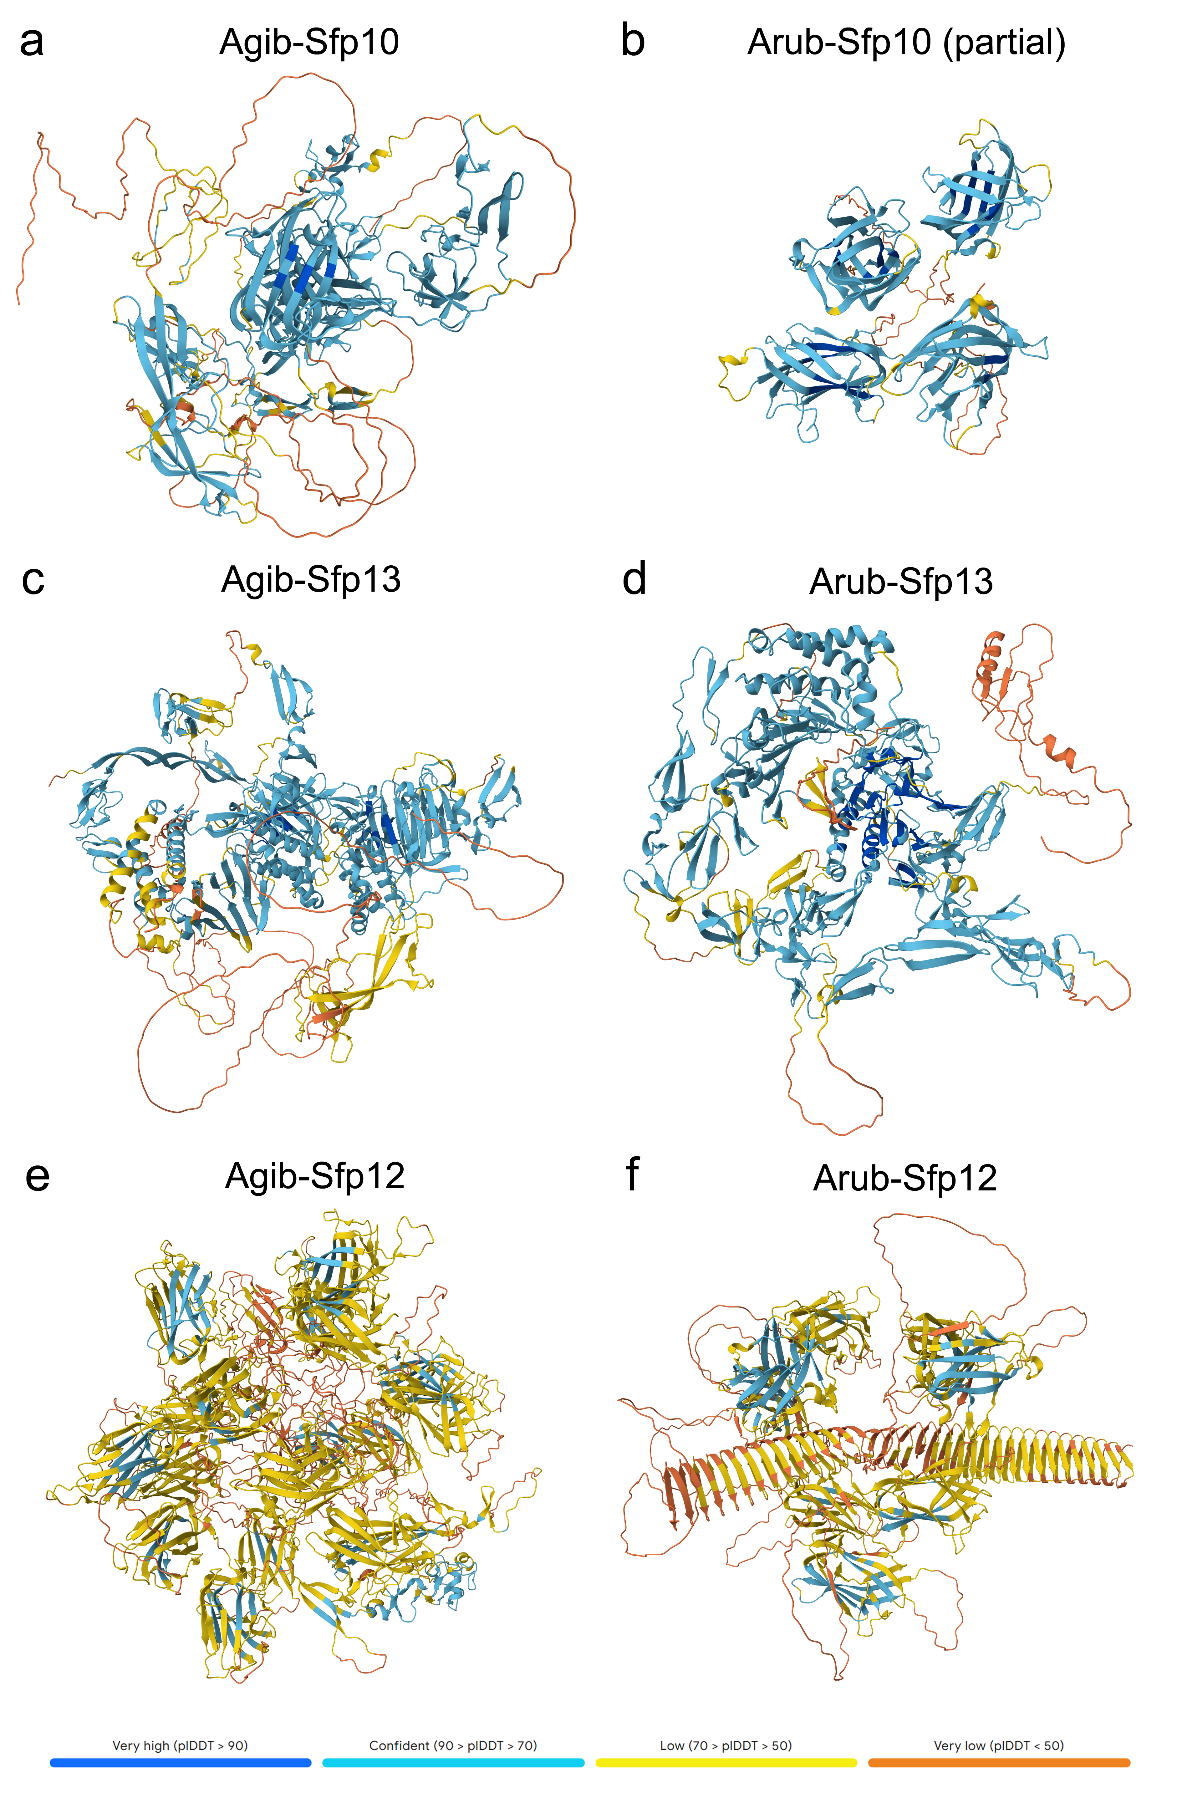
**

**Suppl. Fig. 12: Predicted protein structures of *Asterina gibbosa* and *Asterias rubens* Sfp10, Sfp13 and Sfp12.** AlphaFold structure predictions of (a) Agib-Sfp10, (b) Arub-Sfp10, (c) Agib-Sfp13, (d) Arub-Sfp13, (e) Agib-Sfp12, (f) Arub-Sfp12.

**Other proteins detected in the deposited material**

In addition to the 10 Agib-Sfps, the deposited material analysed by mass spectrometry analyses yielded 24 further protein sequences. Nine corresponded to ubiquitous cytoskeletal proteins (beta-tubulin, alpha-tubulin, actin), which showed the expected widespread ISH signal across tube foot tissues and are unlikely to be adhesive effectors. Three collagen-like sequences were exclusively expressed in the connective tissue and likely reflect minor damage of tube feet tissue during sampling. Six sequences were annotated as mucin-like; one displayed broad expression, one was expressed in the stem and some cells of the disc, two were restricted to stem epidermal cells, and for the remaining two no expression could be resolved. Proteins mediating attachment and release in sea stars are considered to be solely produced by the adhesive and de-adhesives gland cells of the disc epidermis. Therefore, we consider these proteins unlikely to play primary roles in adhesion or detachment. Nonetheless, non-specific components (like extracellular proteins) can be incorporated into footprints and have been reported alongside adhesive cell secretions in sea stars10,15.

| **Name** | **transcript ID draft genome** | ***in situ* FW primer name** | ***in situ* FW primer seq** | ***in situ* RV primer name** | ***in situ* RV primer seq** | **length *in situ* probe** | **notes** |
| --- | --- | --- | --- | --- | --- | --- | --- |
| Agib-Sfp1 | g23502.t1 | FW2_Sfp1_AG_T7 | CATTTAGGTGACACTATAGAAGATCCTCCAGCCTTTGATGTAGC | RV2_Sfp1_AG_Sp6 | GGATCCTAATACGACTCACTATAGGTTACGACGAGGGAGAAGAGAGC | 756 |  |
| Agib-Sfp2 | g17182.t1 | FW_18890_Sp6 | CATTTAGGTGACACTATAGAAGTTGTCCGAGAAGTAGAGCTTGG | RV_18890_T7 | GGATCCTAATACGACTCACTATAGGTTGTCTGAGCTGTTGATGATGG | 780 | reverse primer in 3'UTR |
| Agib-Sfp5 | g22444.t1 | FW_AG_320_Sp6 | CATTTAGGTGACACTATAGAAGCAAAGGTTGTGTGCCCTATTCC | RV_AG_320_T7 | GGATCCTAATACGACTCACTATAGGTGGTGGTGTGACGTCTTTAACC | 743 |  |
| Agib-Sfp7like | g22446.t1 | FW_AG_11422 | GTGTGCTTCGCCAATGTGTAT | RV_AG_11422_T7 | GGATCCTAATACGACTCACTATAGGCCAATTCAAAACCATCTGAACA | 503 |  |
|  |  | FW_11575_Sp6 | CATTTAGGTGACACTATAGAAGCGTTGAAGGTTGGAAGGGTTGG | RV_11575_T7 | GGATCCTAATACGACTCACTATAGGGATACTTTGACGTCACTGCCGC | 802 |  |
|  |  | FW_AG_12267_Sp6 | CATTTAGGTGACACTATAGAAGCTGAGAGGAGGAACGGAAAGG | RV_AG_12267_T7 | GGATCCTAATACGACTCACTATAGGCTTCAAAACAGCCTCCACTTGC | 760 |  |
| Agib-Sfp8like | g22445.t1 | FW_AG_13168_Sp6 | CATTTAGGTGACACTATAGAAGCTACTGTCTTGTCGACCCATGC | RV_AG_13168_T7 | GGATCCTAATACGACTCACTATAGGGATTTCACAGCCGTCTTTGTCC | 757 |  |
|  |  | FW_AG_13167 | GTCGAAAGAGGAGATCCTGTGG | RV_AG_13167_T7 | GGATCCTAATACGACTCACTATAGGGAAACCATTTGCCTCAGGTAGG | 773 |  |
| Agib-Sfp9 | g820.t1 | FW_362_Sp6 | CATTTAGGTGACACTATAGAAGGGCTCCATTCCAATAGAAGTGC | RV_362_T7 | GGATCCTAATACGACTCACTATAGGAATGTCGTCACATCGTTTACGC | 719 |  |
| Agib-Sfp10 | g1515.t1 | FW_AG_CL3687 | GGGATAGCACCACTCAAACCTT | RV_AG_CL3687_T7 | GGATCCTAATACGACTCACTATAGGGGGATTGTCCTGTAGCTTGAATG | 419 |  |
| Agib-Sfp12 | g1518.t1 | FW_AG_17503 | TTTCTCAGTCACCCTTGACAGC | RV_AG_17503_T7 | GGATCCTAATACGACTCACTATAGGCAACTCAAAGGTTGTTGCTTCG | 778 | primers bind 21times |
| Agib-Sfp13 | g1514.t1 | FW_AG_g1514 | GACCCATTTCTACCCACAGACC | RV_AG_g1514_T7 | GGATCCTAATACGACTCACTATAGGGCCAATTCTGTACGAGATGACG | 727 |  |
| Agib-trypsin Sfp | g20573.t1 | FW_AG_23632 | TGATCAAATTGAGTTCGTCTGC | RV_AG_23632_T7 | GGATCCTAATACGACTCACTATAGGAAGGGGTAGCCTTTTTATGAGG | 711 | reverse primer in 3'UTR |
| beta-tubulin | g17281.t1 | FW_AG_CL1338_Sp6 | CATTTAGGTGACACTATAGAAGATCCGTGAAGAGTACCCTGACC | RV_AG_CL1338_T7 | GGATCCTAATACGACTCACTATAGGCGGTATACCAGTGGAGGAAAGC | 736 | ISH probe detects all |
|  | g20790.t1 |
|  | g17282.t1 |
|  | g17279.t1 |
| alpha-tubulin | g23384.t1 | FW_AG_g23384 | GGCTTCACATCTCTGTTGATGG | RV_AG_g23384_T7 | GGATCCTAATACGACTCACTATAGGTCCATACCCTCTCCCACATACC | 800 |  |
| alpha-tubulin | g2072.t1 | FW_AG_293 | AGATTGTGTCCTCCATCACTGC | RV_AG_293_T7 | GGATCCTAATACGACTCACTATAGGATGTGCGCATGTTTAACTGACC | 790 | ISH probe detects b |
|  | g23379.t1 |
| actin | g2207.t1 | FW_actin_AG_Sp6 | CATTTAGGTGACACTATAGAAGAATGTGTGACGACGATGTTGCC | RV_actin_AG_T7 | GGATCCTAATACGACTCACTATAGGTGTATGTGGTCTCGTGGATGCC | 842 | ISH probe detects all |
|  | g2208.t1 |
| mucin-like | g6139.t1 | FW_g6139.t1 | CACCGTCAATGTTGTGGATACC | RV_g6139.t1_T7 | GGATCCTAATACGACTCACTATAGGCGATGCATTGACAAGAATAGGC | 728 |  |
| fibrillin | g8709.t1 | FW_AG_4326 | GATCATGTCCACTGCTGTCC | RV_AG_4326_T7 | GGATCCTAATACGACTCACTATAGGCATACGATGTTCGGCTCTGG | 647 |  |
| nectin-like | g13105.t1 | FW_AG_10669 | CCGTTGAAGGTACTCCAAATCC | RV_AG_10669_T7 | GGATCCTAATACGACTCACTATAGGACAACTCAAATGCGATGTCTGC | 847 |  |
| mucin-like | g2297.t1 | FW_AG_9512_Sp6 | CATTTAGGTGACACTATAGAAGAGAAACAACGCCCACTGAAGC | RV_AG_9512_T7 | GGATCCTAATACGACTCACTATAGGAATTCCGTGTACGAGGAGAACG | 717 |  |
| peptidase | g13062.t1 | FW_AG_9476 | AAGCTAGCCATGAAGTTTCTCG | RV_AG_9476_T7 | GGATCCTAATACGACTCACTATAGGCATACTGTTGACCATGCTGTCC | 750 |  |
| vitellogenin | g18251.t1 | FW_AG_11908 | GTGACCACCAATGACTCAAACC | RV_AG_11908_T7 | GGATCCTAATACGACTCACTATAGGTGCTCCATACCGTTGTACTTGG | 794 |  |
| mucin-like | g8301.t1 | FW_AG_5870 | GGAAGCCTCGACTACAGAAGC | RV_AG_5870_T7 | GGATCCTAATACGACTCACTATAGGAGATTTGAGAGCCATTCTCTGC | 752 |  |
| mucin-like | g13556.t1 | FW_AG_g13556.t1 | CGAGGATTACCCCTGTAAGTGC | RV_AG_g13556.t1_T7 | GGATCCTAATACGACTCACTATAGGAGGAGTGTGGTTGTCTGTGACG | 745 |  |
| collagen-like | g21878.t1 | FW_AG_g21878 | GCAATGAGAAGCAGTGTGAAGC | RV_AG_g21878_T7 | GGATCCTAATACGACTCACTATAGGCAGATGTAGCCGTACTCGTTGC | 743 |  |
| collagen-like | g21876.t1 | FW_AG_g21876 | GCTGTAGTCAAGGAGGGTGTCC | RV_AG_g21876_T7 | GGATCCTAATACGACTCACTATAGGGCGTTCTCCTTTCATGAACTCC | 762 |  |
| collagen-like | g21882.t1 | FW_AG_CL4179 | CATGGACAACAAGGAGATCAGC | RV_AG_CL4179_T7 | GGATCCTAATACGACTCACTATAGGACACAAGTCTATGCGGTTGAGG | 701 |  |
| lectin-like | g12992.t1 | FW_AG_CL1413 | TTTGGCTTTTGACTCAGATTGG | RV_AG_CL1413_T7 | GGATCCTAATACGACTCACTATAGGAGGTTCGTAAACGTTCCAGTCC | 779 |  |
| peroxidase-like | g19869.t1 | FW_AG_29402 | CCAGATTGTACAAGACGGATGG | RV_AG_29402_T7 | GGATCCTAATACGACTCACTATAGGGCATGATTTGCGACTGTTATCC | 761 |  |
| mucin-like | g2294.t1 | FW_AG_g2294 | TATCCCACTGCCTCGTCCTTAT | RV_AG_g2294_T7 | GGATCCTAATACGACTCACTATAGGCGCACAACTTGGTGTAGTCCTC | 792 |  |
| mucin-like | g13555.t1 | FW_AG_g13555.t1 | ACTCAAAGTGTGCGTCATCACC | RV_AG_g13555.t1 | GGATCCTAATACGACTCACTATAGGTTCCATCCTCTCCACAGATAAGC | 710 |  |
|  | g17264.t2 | FW_g17264 | GGCAACCAGAAGTACAAACACG | RV_g17264_T7 | GGATCCTAATACGACTCACTATAGGTGGTACTCATCGCCATTGTAGG | 749 |  |
|  | g7833.t1 | FW_g7833.t1 | CTGTTGTCAACGAGGAGAGTGC | RV_g7833.t1 | GGATCCTAATACGACTCACTATAGGCATCAATGTTAGTGGCGAAACC | 750 | no amplicon |
|  | g12320.t1 | FW_g12320.t1 | GTCTGAATGAGGTGACCAAACG | RV_g12320.t1_T7 | GGATCCTAATACGACTCACTATAGGGGATATCCTGGCGAATAGATGG | 715 |  |
|  | g14405.t1 | FW_AG_g14405.t1 | CTTCATGATGCGAGAGGTGACG | RV_AG_g14405.t1 | GGATCCTAATACGACTCACTATAGGGATTCCCGATTCCTCAGTGTGC | 799 |  |

| **Name** | **transcript ID draft genome** | **transcript ID tubefoot-specific transcriptome** | **FW primer name** | **FW primer seq** | **RV primer name** | **RV primer seq** | **length PCR** | **notes** |
| --- | --- | --- | --- | --- | --- | --- | --- | --- |
| Agib-Sfp5 | g22444.t1 | Unigene320_AG_TF1 | FW_AG_320_Sp6 | CATTTAGGTGACACTATAGAAGCAAAGGTTGTGTGCCCTATTCC | RV_AG_320_T7 | GGATCCTAATACGACTCACTATAGGTGGTGGTGTGACGTCTTTAACC | 743 |  |
| Agib-Sfp7 | g22446.t1 | Unigene11422_AG_TF1 | FW_11575_Sp6 | CATTTAGGTGACACTATAGAAGCGTTGAAGGTTGGAAGGGTTGG | RV_11575_T7 | GGATCCTAATACGACTCACTATAGGGATACTTTGACGTCACTGCCGC | 802 | The g22446.t1 sequence was predicted 1344 bp too long, transcriptome data plus sanger sequencing confirm shorter version. |
|  |  |  | FW_AG_12267_Sp6 | CATTTAGGTGACACTATAGAAGCTGAGAGGAGGAACGGAAAGG | RV_AG_12267_T7 | GGATCCTAATACGACTCACTATAGGCTTCAAAACAGCCTCCACTTGC | 758 |
| Agib-Sfp8 | g22445.t1 | Unigene13168_AG_TF1 | FW_AG_13168 | CTACTGTCTTGTCGACCCATGC | RV3_g22445 | CGGTAGTAGAGTTTGGATTGCC | 1803 |  |
|  |  | Unigene13167_AG_TF1_120 | FW_AG_13167 | GTCGAAAGAGGAGATCCTGTGG | RV_AG_13167_T7 | GGATCCTAATACGACTCACTATAGGGAAACCATTTGCCTCAGGTAGG | 773 |  |
| Agib-Sfp9 | g820.t1 | Unigene11005_AG_TF1 | FW_AG_11005 | CTCACCTACACCCGAGCTTACG | RV_AG_11005 | TGTTGGTTGGTGATTGCAGAGC | 896 | The g820.t1 sequence was predicted too short, Unigene11005 encodes for the end. The end of Agib-Spf9 was confirmed with PCR and sanger sequencing. |
| Agib-Sfp10 | g1515.t1 | CL3687.Contig1_AG_TF1 | FW_AG_g1515 | GACGATGGAACTGGACGAATGC | RV_AG_g1515 | GCAAACAGGGCACGGTATTCAA | 1677 | Sanger sequencing revealed that sequence is 30 bp longer. |
|  |  |  | FW_AG_CL3687 | GGGATAGCACCACTCAAACCTT | RV_AG_CL3687_T7 | GGATCCTAATACGACTCACTATAGGGGGATTGTCCTGTAGCTTGAATG | 419 |
| Agib-Sfp12 | g1518.t1 | Unigene17503_AG_TF1 | FW3_AG_g1518 | ATGGCTTCAAGGGAACAGCC | RV_AG_g1518 | TTCACCACCAGTTACACTTCGG |  | Sanger sequencing revealed different start than predicted in g1518.t1, start codon still missing. |
|  |  |  | FW4_AG_g1518 | ACGACTGCAATCTTGCCCTC | RV_AG_g1518 | TTCACCACCAGTTACACTTCGG |  |
|  |  |  | FW4_AG_g1518 | ACGACTGCAATCTTGCCCTC | RV_AG_17503_T7 | GGATCCTAATACGACTCACTATAGGCAACTCAAAGGTTGTTGCTTCG |  |
|  |  |  | FW3_AG_g1518 | ATGGCTTCAAGGGAACAGCC | RV_AG_17503_T7 | GGATCCTAATACGACTCACTATAGGCAACTCAAAGGTTGTTGCTTCG |  |
| Agib-Sfp13 | g1514.t1 | - | FW_AG_g1514 | GACCCATTTCTACCCACAGACC | RV_AG_g1514_T7 | GGATCCTAATACGACTCACTATAGGGCCAATTCTGTACGAGATGACG | 727 | Sanger sequencing revealed that sequence is 30 bp longer. |
|  |  |  | FW2_AG_g1514 | CCAACTGTGTCTTAAGCTGCGG | RV2_AG_g1514 | TTGCAGTTGTATTCACCGTCGC | 1978 |

| **Protein name** | **aa** | **MW (KDa)** | **pI** | **Amino acid %** | | | | | | | | | | | | | | | | | | | | **N-glyco** | **O-glyco** |
| --- | --- | --- | --- | --- | --- | --- | --- | --- | --- | --- | --- | --- | --- | --- | --- | --- | --- | --- | --- | --- | --- | --- | --- | --- | --- |
| **Acidic** | | **Basic** | | | **Hydrophobic (aromatic)** | | | **Hydrophobic (aliphatic)** | | | | | **Others** | | | | | | |
| **D** | **E** | **R** | **K** | **H** | **F** | **Y** | **W** | **V** | **L** | **I** | **P** | **M** | **C** | **Q** | **N** | **S** | **T** | **G** | **A** |
| Agib-Sfp1 | 3857 | 428 | 5,09 | 7,7 | 6,5 | 5,3 | 5,3 | 2,0 | 4,5 | 3,8 | 1,5 | 7,0 | 4,9 | 5,4 | 4,8 | 2,0 | 5,4 | 3,2 | 4,5 | 6,5 | 5,5 | 8,2 | 6,1 | 1 | 66 |
| Agib-Sfp2 | 3766 | 414 | 5,36 | 6,6 | 6,9 | 4,9 | 5,7 | 2,3 | 3,5 | 3,6 | 1,0 | 6,5 | 5,9 | 4,5 | 5,8 | 2,0 | 5,6 | 4,1 | 4,7 | 6,9 | 6,2 | 8,4 | 5,9 | 4 | 114 |
| Agib-Sfp5 | 3778 | 398 | 3,98 | 10,3 | 5,6 | 1,5 | 4,4 | 0,2 | 3,8 | 2,1 | 0,2 | 8,8 | 2,6 | 4,6 | 8,8 | 1,5 | 5,1 | 2,3 | 5,3 | 8,1 | 12,5 | 5,3 | 7,0 | 9 | 300 |
| Agib-Sfp7 | 2210 | 238 | 9,95 | 3,7 | 6,5 | 7,1 | 15,9 | 0,5 | 2,7 | 1,7 | 1,0 | 5,4 | 3,3 | 3,8 | 6,9 | 0,8 | 4,8 | 2,4 | 3,1 | 10,9 | 3,9 | 12,6 | 3,0 | 1 | 200 |
| Agib-Sfp8 | 2512 | 175 | 9,97 | 3,9 | 6,3 | 6,3 | 16,6 | 1,0 | 3,0 | 1,5 | 0,6 | 4,2 | 3,5 | 3,2 | 7,8 | 0,7 | 4,4 | 2,4 | 6,5 | 13,7 | 2,6 | 8,0 | 3,7 | 21 | 304 |
| Agib-Sfp9 | 1572 | 172 | 5,01 | 6,3 | 7,5 | 4,5 | 4,9 | 2,5 | 4,2 | 4,0 | 0,9 | 8,8 | 6,7 | 6,4 | 6,6 | 3,4 | 1,6 | 3,8 | 3,6 | 6,9 | 4,9 | 6,6 | 5,9 | 3 | 2 |
| Agib-Sfp10 | 1321 | 145 | 4,46 | 7,2 | 9,2 | 4,3 | 4,1 | 1,5 | 2,6 | 2,0 | 0,5 | 5,4 | 6,6 | 3,7 | 6,1 | 1,7 | 8,5 | 3,6 | 3,6 | 7,3 | 12,5 | 6,5 | 3,0 | 7 | 156 |
| Agib-Sfp12 | 19079 | 2055 | 4,34 | 5,9 | 8,7 | 4,8 | 2,5 | 0,4 | 2,3 | 1,5 | 0,1 | 6,7 | 9,6 | 4,5 | 6,8 | 1,1 | 1,2 | 4,8 | 2,1 | 9,5 | 16,4 | 5,8 | 5,2 | 8 | > 1000 |
| Agib-Sfp13 | 1926 | 205 | 4,81 | 6,7 | 7,8 | 4,9 | 4,2 | 2,2 | 3,4 | 2,5 | 0,9 | 6,8 | 3,7 | 7,1 | 4,7 | 1,6 | 8,5 | 4,0 | 2,9 | 6,3 | 8,1 | 8,0 | 5,7 | 2 | 98 |
| trypsin-like Sfp | 261 | 254 | 8,76 | 3,7 | 1,2 | 2,8 | 4,1 | 2,4 | 1,6 | 4,5 | 2,4 | 8,1 | 5,3 | 5,3 | 2,8 | 0,8 | 3,3 | 1,6 | 6,1 | 19,5 | 4,1 | 12,6 | 7,7 | 1 | 1 |

**List of Agib-Sfp protein sequences**

>Agib-Sfp1 (g23502.t1)

MKATGFVALLVVCFLRDAVCSDVPCSCADVKARGSSDSGDYDIDPGNGVISVYCDMSGRDPITIVHHDHEFENREDRRVDNCEEPGSFSARIGYKAAIERVIALADLSDYCEQYISYIAHGSVLRWKPEKQAYGWWEDRWGFKMMNWGGAPSGTDGCGCSVSPGGCKEGWRCNADCNIHDDIEDAGFLRDKSHLPVATLRFGDTGTLDDDEYGFYELGPLRCTGGPVQREIEIPIFETNTEYRYRYTLPALDAGDCRVEFEVNANNDVFLGFSETEGEQSNLIELNMGGWGNSKTVFRQCKQCTPQASWRENGVVTWGERRGFWVDWSDGCFRLGRSGKSHSLSWCPPRVKNWKYVAFTTGYGSSGQFKFNSFYSKVQYTCEHDTAFINCGSNYINILDANYGRSRGDICPDGPITSTECISITSRSIIGKLCHGEHDCRVEVNNGVFGDTCSGTYKYLKVKYQCVPQREEKYFIPEACLEHKCNPRGGECIPVSSSEYRCACKSAFHGEFCEHEYALCRAWGDPHYTQFNGRNFNYQGKCKYILAQPCVEEADRTFKIVGVNVAPDWNKKVSFNRQLEVQIGGVEISLLQKKQVVINNNINNVPCSVGEDVSIDFDGKYVVVSSEKYGMKVMWDGCQVYKIFVDRDLYGENMCGLCGGLKVTEKGVFIMRNGTETSKINHFGDSWTANPFECASCDDCVDLDYCNTDDGLMQNVKDACEPIRDPNGVFAVGHEQFDPQEMYRTCIYDLCSRKSFNDEIRCDMLTEYANRILVENRLRYFQTGNAIIHWRAQLACPIECPTGSIYTICASACQPTCFQRMAPTSCSSNCVEGCEAAPSYVMENGVPIPEWKCGCRYGDLYYNVEQQWLNHDCTLSCICEAGGQTKCHEVKCAEHAMCGSMNQVHGCHCEANYIGEGTSRCLPICPSNMGNEIKLRAFVDEGQHAIIDFSRPIACEGYIRGFTIKRNADSMEPVTLIVWRPHTNEEGKFLIVGSARLNIADDSVDLCQCDSSKIPVRAGDYIGFISSGGTVYYDDENDPEAGEVYVADYFDSTEPMTEVQFAPLGKRTYSINVVLESSEGKHVEAFMFNSYLGVQSRTIPDSAMTASSSHGKYEAHQGRLDNSKYGACSWTAGSADKDQWLQVDLGQETLVIGVVSQGHCGIADKDGSPMGCVKQFHVQYSSDGQTFEYVTDDHGEADIFESRCRCQKHIKNFFRSALMTRFIRVEPVLWKNAISMRVDFIGRDIEVDEPDVAGTDAPVDEAEVDMAVVLKGRPFKRCGFLKGIKYRPFNAESFTVAVVRQIKDSEDTFELIGSTYVTTSGKDRLQRFEVAEENDRIPVKKGDYLCLIFPKAVIGYSASDDPKDVVLTASLGFDEYKAITMNGQINFPNKDGRKYSGVRPIFQVATTKTIPPVMSTGSLGVEEGQVKDEQITASSFCDAHSKAERARLGLKDQQGMTGGWCGRELDQSAFIQVDFKKVRRCGGVVTQGLSSATRFWFVRLYIVQCSLDLTAWEDILDDDGNIMMFDGNSDQDTEKPNFFAEVKNCRALRIRPMVWSGPYPALRFDILGLPDIVSTEPKVGFSCRHRDYRGSGGFTFVMPAKKFDSDGFVTGVRFMAVRRGSFRVIIFRPVDEATMTYKVVGKRHIKVKKADVEVVVNFKRGKKNRKRKKWISVKEGDMLGLSFTRSVLYKSKEGADLTDVVFSRNIDIPKFRKLRCGRVITFNGVAPRSYSVVALFKAKDPSECAPPVDAYKSLGVENGQFPVDSISVSSFHETDNPDQDFGPSSSRLNYVGIHDGAWASAASDTEPWIQVDTGAQSVFTGLITQGRHSLINWWTTKYRVAYSDDGDDWKDVKDCNGRTEFDANKDSDTPVTRFFGSAVSGRYLRIIIVAAMDRPALRFEVLGEFETAATEYGPSCIMREFIDSKNYILLAAGSSFESDGYVTEWRYFPKSDKPFKAGVWRPDPDDPTRYKHIGSSDIPGQTPNELATYRLDSMARIPFRKGDVYGWSFGEPVICYDEGEESVELLYSGNGGNLEPTPVGQYRKFVSSGKQAYSIGASVQIVSTGTVPALACMNGLGMDDDTIPDKSIETSSVLGLAYGNSQSRLNAEATATLKGCWAPAQNKKDEYVQVDLGKPTVVTGVSIQGCNGEERWVTKFKVELSMDKKNWKEARNKQGGTIFYGNSDSDSVVQVFFKKEVKARLFRISVEEWKKDIGLRFDILGCPAACETEWGCKPLVRRWQYSMCDKTFVVNTQHPLTCNSYIKGWRMIPRNKAPVTFYVLKPINLKRGKFKVVGKTFVPRRKKLQKGEVYEILLEPKDWIEARSGHMIGFTSRYRSPIHRDKKAHDRSKHMMTRNKKIKGYKRLDIGDKFHMRNHRHRKAAFSFTAILTQEGMGGGKEVPPVACVGGIGMENGAIPDESILVTSSMDPLNNGGAAARLLGDNAWIASPDDPTPYIQINFGYRAKVTGISTQGDPTIDSWVTSYSVEYSDSCHYLTKEPQNFQWVKFTNTLKDIFAGNSDQNTVETRFFKEVIEAQVVRVWPLDFHNHAAMRLDFLGCSDEDPCSPNPCKNGAICRKTQASFGYTCICPVEWGGKNCDIKAHKCCAYGDPHYCNFEGKKFNFQGHCEYILARTLTTTTLEHFTITADNVKSQRRPSVSTTKEVYVKIGDKKFDFKRNRAVYVNGELITCPYEIDGVTVSDGGNKRVILRTDFGLTVSWDGRSKVDIFLTEDYMNQVEGLCGNYNGDNSDDFILRSTGELTTDREQFGESWGADPTCEKCTDCQETDICRLTERLEEAQDACKLLNNRNGPFTMCIAAIKPVDYFENCLYDFCALYPTQDNLCEDIQKYADECIDAGLQVGNWRRRGFCYVECPVNMVFSQIGTMCPDTCGDMDASKDCTGQAGPMCVCMPGLYLEDGNRCVEDAQCGCTYQGVYHKNGLRFMADDCSEICTCNADHEAECEEVTCNAHATCQVEDGVRGCYCNDGWSGDGMETCEEILEPADVVVCEDDTLTIDCSASGELIDILTAIYSTEPRAECPNTADNAESEEFRYAKAIIRDRCHKHASCTVPVSSLVFGNFGENAPKSLYVRYQCREVVPDSICHPDVELISCQGSDLEIQCGDEKIDIISANFGRRQGDHMCSTDDNEVLTQDCFAPSALNKMVEACHLSPMCTINTIPETFGSDPCPNTNKYLRIHYQCNPSPDPRELEEDKCEPNPCVNGVCEAISIEPKYNCKCNPGFTGQHCDIGTATCKAHGDPHYITFDGKIYSYMGHCKYTLVKNADGDVPDFEVVVYNQAARRNPAMSSTVHVQFNYVGKEVHMYYLGKTFINGIQIEGMDTPEMKISVNYPDVVIETQIGVTLRWDGKYMIEVDVTGEYYGHTEGLCGTYNGNPEDDFLTPFGETLDPLVDGNIDVFGDSWLIPDPAITSCDKCEDCDRLEPCSDAAVKDAAQEICNNILSDSGPFQSCHDTVPPIEYFKNCVVDRCTMPDGLAHCDDYQAYAEACRDAGIIINWRRQDFCFIDCLAKNMVYSPVSPACPATCANPMASSTCNRADREDCVCPSGMIKEGETCIDEEKCGCVDQETGFYYRQGETFMTPDCSRVCSCAAAHDLQCVQFQCPPHEVCGTRDASPACICDEGYFRDTDSNTCEAIPVPQVLLRSQKELECTTITCGKGFIDVLDANFGPRVDEVCLEGDAPTDCNAAESRAIMRNLCQGRGTCQLDPTTVQAFGEPCFGALNYIFVNFACTHKPIAHGEPRSLPFELRVCQDSSLYLACREEEAISIKSVFFGRRANDGYCLDDGSAAPAEEYSDDTAMNRALELCAAQSSSCILRGNDFGDPCKTTKEYLEVSYSCVPKVDGE*

>Agib-Sfp2 (g17182.t1)

MARMKPSGWLALLAMLVAVTRTAASVNMQTKYACEGEILRLDCGDEYIKMWSALYGRANPTICQDDVMAPLSHACRADKSNFETLRHCDGNHTCEIQAENSVFGDVCGSIKKYLQVEFYCRTEKSSECNPRVAPEYKTKYACDNTDLVLECPNPGEVIKILDANYGRQGSNVNCTYRPGIDDVFCDDGTGESFEHVCLECRGKTECTVPVSPQEFKDRCVNTNKYLSVQYVCISTEEEEEEEEEEDERDTPMGSEIGTTQRPERPRPRPERGTTPAPKGPTFIFLPKPGQAASGSIGSASGPSSSKTFTWNGGFAAPQPGSGNAGGSIGTDTEEETPKFFTFPKPGQGKNVIQGSIGESQADGSEGSFTWGGEPFKGFTSLFAPVGAAPGSTEMVMKIIVKTDSNGQKYFTWQSQPTGATPGDNEYLMKIDLTKLSQYTQQFTFAQLIKEFNRGITFYNMYNKPSDVSSPFQFSIGNGLTAFFPSVFQLITEVDATTGKTITAPSSSSSSFQVVLDGGNRQIIEYLMSFTNMNQELRSELLDHNLRIPLRYYDDKTKKIEDIKIPFFINYNGLKELLSTIFNAMPKPTSQFGLKFQVVGEDGRSEMVTLPFTIIEYQGKKMLFLTLSTCAAYKLYGFVDDKEYLIDPDGINKGEQPFVVNCNMEKGETIIDHNREESTVASYPAGQSRLNIDVTYKGASAAQLAALKTVSETCEQELSHECVKTSAHFVGGDAKIWWQSFDGKKRENWGGVETDVKKCHCGTTDTCVIKGSLCNCDNAEGTSDWGAVTDKDTLPVSRVVFEKPAAAQGQDKLKVGALKCSGDQSSNTLKFFITLMQMLARGTGGKVLRTCDEYKNVGYELDGVYLIDPDGKGGETPFTVVCNMEKQEHGVTIVHHQVSNQRTIVSNFKEPGSYSKDIMYGATLRQIENLKQVSGVCEQSVTYECQGSAFRVGGVQYHWWMSFDNEKINPTCLENSNCNCDKNDNVLRKDVDVLKDKDKLPVMQLRFGDTGSNNEFGYYTLGPLRCWDNSGKDVATRADLSSCDAIKKADPAARSGNYYIKVNNILERFLVYCDMSGSDGITLVYPDSVRTLEIDGFYEEPGTWARSIRYGPSDRQLQALTTLSASCKQFISHGCHGSLHHDDETGKMYTWWQSRTGAKMTYWGDTKEGCQCFADKSCQGANKKCNCDVNSQSLTSDEGFLTDKSVLPVSGIRSGDVSDNNGWEYGTARLGPLMCQGAPGGRELDSEPDCEAIITEAGGQFREMAEEQAFADFDFSVKTAGVAILKLAVYSGPDSDYYQIEIEPGSNVNFYHCNHNARGEDCKDKQTQSFTSAPPSTAGESKERKFILKFAVSTLELTEGGETLTFQDKRQPMAVKFFAYKTEGDDGHWLFDSVCTGAVQVICVGMGKLSCTPPLKPYIVKALYGRTEKDVCKIENDPTDYPDCQIDVTQNLRKKHLQNFCINQGSSCLFHASDNSYLAALLQEGCRPKQGYLHLVYSCRKELPEERNLGPCSSNPCQHGGTCTESEDEASYSCLCHPKFSGDNCETEMVTCSALGDPHYKNFAGHRFDFQGNCMYVIARDCNKEFEVLVVNQSPQFNPAVSSTAEVIVLINNIKIHLKRDNEILVDNERIDLLPLVEDNFSIKDRLAHVEVHVPEYSLTVTWNRNDIAKVILPKNDGSRDICGLCGHTRAFQPIGSYKMSTGTIVTDPVIFGNSWQVDTESCVANTDPRNANQLSQTISSGKLEIAQRYCKAISTAEVTQCPNTAATADAVKQACEFDHASGLAEKACNIIKDFQEDCVEEGGSVPQGIIQCGAACASHLSPVECVTPCGTCMAFRLLIGNCNEPCIAGCSCADGKYDDGDACVEEDKCGCAHEGRYYKLGSTFLDDTCTEECTCLPDNVVECGPPSNKLCPVHQTEMHTMCMLNDGVYECVCINGYEPNADKTACQAMQLNDMVFPSGRRRRRRDISEDECNVDLGMASGRIADNEISSSSSKNRKSLAYHARPNLAGWTAKRRDTEQWLMVDIIIPTEITGVRTLGDRHRIGTRYKQAWVGVYKVEVKLDSTDPWIAVTDSSRREQFYGNTDANTPVTNMFSEPVRARFIRIRPVSFYGEISMRLEVIGCKQQCDAEIGSFPVIRHISSDNWFVVNTGEPITCAGHVTAWKVIHAREEPLEAWVLRPLKHIPDGFMLIGNTHIPSGPVDKEVEYELLGDQRISVRSGDVVGFLYERNPLYSSEEGEETTDYKWLHIRDISNYETMKPGSSLRFSAGDGKRAFSAVAVLQQSNGVPVPPVLCAGEMGLSMDKMLIPDEAFTASSHVKGHKPIRARLNTLYSHRGMKSGWTPRRRDRKPYLQVDLGTQQHLSGIITQGRHSKADLETFKKGNRRQRRRMRRRKRRARRRHAWVTAYFVKYSLDCEHWEYIKSPDGLRKRFEGNVNPSSPKTNYLDVPVTAKCIRIYPKKQRGAKIGLRLELLGCSADPCTSNPCEQGGTCKQASGLNPDGYVCQCPEGWTGPRCDMVEGMCRSAGDSHYHTFDGRHYYFPGECTYTLAKDCRNSDEPTFDILTNNDAGGREIYIYTNNMMFEFKQEGVVHVDGEACKLPVKRSGVSVVHNAYTGVLLQTTYGLTVEWDGHHRVVVNLPATYAGGVCGLCGDFNGNEDDDIPQDVSEMQFGETFAPEPENCAVCEKCMLDKPYDRNPSKQIEAQEACRPIKDPLGPFARCHGVVSPEETYDDCLQDVSDSDSLSSIPRCTQFAEYADMCAVNGVVITSWRKKNMCGITCPAGMIYTHCGSACPATCGDPHAPNTCTKPCEETCQCPEGLLKEGDKLCVPPSECGCTDNGCYFERFTTFYRFGCTERGLCGLKGEVTYGKSQCGQDATCGSKDGAYGCFCNDGFSGNGHQCTNVQDDKALLTCESEVLNIDCGSGQFIDIVEAVYGRIEDFEKCPTEKQPKGECKSQSAMSVLIAKCQGKENCRLEVSSEVFGDPCYGVNKYLEVDFECTATPKPKTVSGEVMKRVCQGDSMEIDCGNLLIEVTDAVYGRVTDGQVCPGGHIESVDCMAPTSLAVIQQLCHGETKCTGLQAASHLFGGNPCGRTFKYLEVKYRCSSEVVPKANLPASPCAENPCLHGGQCVTVGTSRGYKCTCPHDWTGPNCEFEEVSCRASGVSHIMDFNEQDFEFLGDSEYDLAKSCLENEHDFRIIIKKARMPTENSVSTIEAVHVHYDGKEIELKQEYKVLMDGKKVSDTMNLNYGKIQLCRVGNYLLLKTDFEMIVAWDCLHRVQVRMPDNVARQTCGLCGTYHGLGNENEGFIDRDGNKVEDINAFGSSWRVASDAPAFVHTNLITTHACTMWSSRAHDAANLCAELKNERGVFRSCFAKVNPDTYYRNCMYDMCATLPSQELVCQAMAEYADICLDEGIVIDNWRSAFRDGQCEMACPKGQVYSACVQSCPNSCGDPHAGKEPLDRCYEGCTCRESGHLQDGDQCLTSDNCGCQRLGIYYQPEERVVNDQCTGQYVCLPGGGWDENPLTCDANAHCGVVDHRQGCVCNDNYAGSGKQCFDAKLVTAKSASQGESLHIDCGDDYVDIISADYSYVDPSSAGATTDSDCRASNVMDVLANHISQDGKVLEAKASAYHFGDTCQQTGNVLTVRYLCSVRPIVREVELGKVVHMRGCQEREISLKCKKGSRIRIMKAEYGRQTGSEVCQSAYNQHIMTTSCRASTKRVEKRVRRRCDNREECRIQIKKRKLRVNPCKETPKYLDVTYKCEDYEPN*

>Agib-Sfp5 (g22444.t1)

MALFGAVDLEGLRDFACHKPGRPLDPKMANLLPWILALSFASLSYSEANDLSCSYRDTDGSGDFTFDDLEITDPEFTIAFKVLANSDVNIILSPLKKEDPAAYVITIGANNNELTTIRRYGGEVLKSYSVTEATPFRESELRCYDSCMNAYYICFENGMIRVGRQGESAPYFSYDVPEGETFNPKNVGFGTGSTKVGLFADFLYDKECKRDCVAVDCTGVTCLFGFKKDARGCDSCECKDSPCETLSCAPCKHGYVKDEFHCDTCECIPGPCDEEPCQNNGYCYGVGTTDYGCICTEGYDGDNCENDVQNPTITCPIDMVTTTDPQSAVATITYEQATGSDNSGVDPSIVCSPNSPTLPVGVKTVQCIATDGSSNTASCTYTITVNDEEDPEFDCPLPMDNTPVDSGQPDAVVNYQIPGVTDNVDEDITVECTPAPGSKFPIGRTDITCTSTDKAGNTKTCPFYIEVVDDEGPTIECPIDMSQPTDSGSPTAVVTYDTPVAVDNNDPNPTVVCDLPSGSKFPVKANEVVCTASDNIGNSEKCTFTITVNESCNFEVTVKDEEKPKIRCPLPMPDVLTDPGKPIAVVPFPDPSSSDNADPDPTVVCNPPANSEFPIGTTRVKCTSTDDAGNFATCPFEITVSDEEKPKPSCREDPLQQNTDPGKDFGTVDYETPSATDNADDSPAVTCQEPSGSEFSLGTTTVTCTAFDNAGNEESCTFDIAVVDEEKPKLECPLNMTEPVDAGEDSAVLDIVAPEASDNADLTPDVVCTPPEGQFDFQLGPNPVTCIATDNSGNFEECTYIVTVEDNEGPTIKCPLPMPQPADLGSTTTAVTYNDPIASDNSDPNPVVSCTSASGSEFGIGETNVTCTATDDAGNSNECSFKVIVTDAEPPSFECPADMIESMEIGKPSAVLTYTLPFAIDNWDSEVAVVCTPASGSTFKGGSTTVVCSASDDSGNKNNCTFTIEVQDTEKPEITCPIDMEEFVDAGKAYATLDFDKPAVTDNAALRPKVSCDKTPEVASAYDIGTTTVTCTAVDDWSNSEECSFTIKVTDNEKPKITCPIPMDSVPTDGGQSSATVTFAPQSVSDNADPAPIVFCEKPSGSEFPIGKSTVQCTATDKYENSQTCQFYIIVKDKEKPKITCPIDMTPATDPGAPDATVTYPAPTVTDNDAVTYTCSKASGSKFSFGPNVVICTAKDTTGNEATCTFQIDVKDEEKPRITCPNSKTMRMDDDQGYSTISYDSPTASDNLDTSPDVLCTPPSSTQIFQIGPTTVTCNAEDDNRNSNQCEFTITVKVGEKTVTCSATDSSTNKESCSFTVTITDDEAPSIDCMKTKISQTTDPGQAYASINYELPTASDNADPSPTVSCDKVPGSQFTPGTYVITCTATDDSQNSASCPITITVTDKEPPKLKDCPVSMLDETDTDQSFATVVYTEPTATDNVDKSPIVSCSPPSNSQFDIGTQMVTCTATDSASNVASCDFNVQVKDKQKPEVMCPIDMSKKADPTKKSTYVSFVDPRGSDNSGLEPSVKCDPPSSSEFFIGDNTVTCTATDAASNHEDCSFTITVTDEEPPTVFCTDNKKRVLDAGKDYASFIFSLPTASDNFDQNLVVTCDLPTESTLKLGLNTIVCRASDTAGNEGTCSFVVRVTDDQPPELECPDAAFMETEPGVSTAAISYTVPTANDNVDGSITASCTPDTGDRLSVGENTITCSASDSAGNTETCLFPITIEDKEQPSFDCPLPMPDVTVDTDKDYATVTYTTPESVEDNVDKDIAALCDKESGAQFPIGTSVVTCSATDAAGNPSSCSFKVGVVDKEDPVVKCPIDMNAKTDPSQDYATVSYPALEATDNTNSNLVITCDKLTGSQFPIGPNAVTCTTEDNAGNVGSCTFNIDVVDEELPTVTCPDKMDGQPTDRRANYGTVDYVIPTGSDNADTSPVVSCDKLPGSKFDVGSNTVTCTVTDKYGNSNQCTFDIEVVDEEKPQITCPLPMPDVTTDDGAATALVGYNYPTATDNVDPSPTVTCTPEPNTQFPIGDTTVRCKAVDSAANKKGCNFIVTVTDDEDPKMTCPVDMGPTTDLDKDFATVNYDIPLATDNVDTNLVVDCQEPSGSEFSLGETTVICSVSDSAGNTVTCPFKITVTDEQQPELDCPHDMTEPVDAGEDFATVTYTTPIAIDNADPAPDVDCQPAAGSQFGVGPNEVTCTADDESGNSNTCKFNIIVEDNEGPTIKCPIPMPEAADLGGTSTTVDYDAPEVSDNTDPNPDVTCTQLSGTVFEIGDNEVTCTATDDAGNSNKCSFSVIVKDAEPPQIECPVDMVSSMDPGESFATVTYDLATAIDNWDANPLVTCFPPPGSVFNAITTTVVCSAVDAAHNKNNCTFSITIEDNEKPKITCPVNMDEFVEPGRNVAVVEFDSPTATDNADPRPTIRCNSKSGAEFEVGTTTVTCRAIDASDNRKVCKFDINVKDNEPPKFKCPASLNSISMDPGKAIATVGYILDTPTDNADPAPTVVCNPAAGSEFPLGTTTVTCTASDVYANSKDCSFQVVVIDDEKPEFDCPVDMDAKTDVGVATGTVTYTTPTANDNVDGEIPVTCTPESGTVFSVGVNIIMCTSTDSNGNTRTCPFNITVKDEEKPKFDCPVDMSNIPVDPNEAFAIVSYPQPDGTDNVDSNIQVYCVPEQKSRFPIGTTEVTCAATDKAKNSERCSFDVTVVDDEGPKFTCPIPMVQKTDPESSTAVVFYDAPIAEDNADGSLPVTCEPASGSTFPFGVTTVQCSVTDSSGNVADSCQVPFTITVEDKEKPKVTCPINMDDIPSAPGDSSATVDYTIQDAQDNVDGIIPLNCNKPPGSKFPIGTTTVLCTATDASTNSASCSFTVQVVDEEKPEFDCPIDMTQNMDKGSSTAKVTYTVPTATDNKDGSVPVECVPASGSAFGIGATTVECTAVDSAGNKKICPFTITVEDKEKPELDCPVDMTDIKVDAGRADARVVYPTPEATDNVGGVFKATCVEPSGSKFPIGNSTVRCSATDQSENSEECTFKIQVKDNELPSFECPVSMTEPTDAGVKDAVVTYPVPTANDNADGSIPVTCMPESGSTFPVGTTSVLCSATDSSGNTHTCPFPITVEDRELPKFDCTDDMHVFTDSGKNYATVDYPEMPVTDNVDSNLEVTCVKPSGSQFGIGDTKVTCSATDSANNKKTCTFTVYVTDKESPEFECPVDMSQPTDAGNPTAAAAYTEPTSTDNVDGIKQAKCLPAPGKVLPVGPNTITCTATDSVGNSATCTFTLTVEDKEPPKVVCPIPMKDVSVDPGQNYATVNYPDPTAEDNVDCSTTFAITCVEPQGSQFPLGESTVTCTTTDMAGNPGSCSFTITVVDDEAPKFTCLDRITQPTDAGMPTASVPYTEPTATDNVDSAVAVSCTPAPSTAFEIGTNTVTCTSQDSSGNKDTCSFEIVVEDKEAPKITCPIDMDNQAPDQGATFATLTYPWPTVTENSPAIPTVTCDVQPGAQFSIGTTTVTCTASDPYGNAADCSFTVEVKDVTPPNVNCPADMTFDTPDDVIFQAKDVTAIDDDGTSRPVTCDNAQIIYSSGANSITCRASDASGNEASCSFNIIIDPPVCAFPTEVNSYNYYAPCATPLKPNHRTKLCFTGSSESYMYVGIWDRQSPMYNVEMLDLMIDGDSLQITLGDNIQMETITGFKTGDTLICVERTADEIILTHDDTPLFTQPTSEPLTQIGFASSLDAYWITQSVFGSPGASRRRRSVDDSDPIRAAVKRRRRRSAADVDLLTRKRR*

>Agib-Sfp7 (short version of g22446.t1)

MATSKFIVLLLAAISATAIAQSDPSNHMCQLYQTEKNTEIQWLPDTLPNPRFQFNFRVIALADVRIVLAESPLPSAKRIIIGLGTARNSKSYILRPSGRQGETRNTPNELKCDRFNEYWLQFEPRSLKVGRVGERFPFIEFDIDPNNPIVPKHVGFGTSPASVGVFSFSDFKEHSPIFHEHVFMTDKGYCYDWTLRPWPISAKVCFQVKTEGIAALALSPEKDPSAGELVYEIELGFSNNQLTVLRRGMHGANIAVESTKDILDCDEFRTFCLEARGPRITLTALGDPKPILDFTDEERPEVIYRYIGFAGGYDFQVWWRWPVDMVPDYEVPKEPEIVPEPQDPCQPNNPCLNGGKCTNLGGGKYSCACINRYSGDNCEVKPDNPSGSDVKVSTAEPPPRPRDPCRPNNPCQNGGICSSSGISQYNCQCMNGYSGTDCEIEPDPCQPNNPCQNGGVCMPAGGMQYNCMCMNGYSGQNCENEPDPCQPNNPCLNGGVCTPTGGMQYACSCSNGYSGENCEIEPDPCEPINPCLNGGSCSSTGGEAYSCECVDGYSGDNCETEPTPTDSITIITEDIDETKFPDIPPLTPDGLYEICIVVNPKKFVFIVIYASREDVGQEPALYDLTFEPGVPAKVESQGQQVGQVVEWSGTLSICIAIGDQIVIYRKDGAPMWTLPKQDVEHIEIGFSSSIETTWTITTEENEEPTEPENPKEPPRDCPQIRCAYPCPKGYKKSEDGCPTCECKGKRNRGGVCRNFEIALPKFAAKLRDCDKRCKADNNCKRPYKCCSTDCGNVCTKACKPVQCRKKCQFGWKTNKRGCEICKCKESPKEIPSPEEPPQEPENPSPEEPENPSPEEPPKGCKPVKCRKKCLFGWKKNKRGCEICKCKEPPKGGEPEAPEPAPPCKPVKCKKKCLFGWKKNKRGCEICKCKEPPKGGEPEVPEPAPPCASPMCIFPCPKGYKKDDNGCDTCDCKGKVEHRGTCPVLEGVAGICSEECAVDNNCQRKEKCCSNGCGHTCMKACRAPKCRRSCEFGFEREDGCETCKCKAGPEPSPPEEQPPREPPAGSEPPKPKPKPEKPRPGPPAGSEPPEPEPEEPTCPELTCDLDCSDGFELGADECEICDCIDIPDETDSGQPEDEVGTFLTTTGGSKEIIITKEVDTTQEQQFTIDKENPVEFVLTSADGELGIVVVKTYVKIVTSSGKTRKTVKLPKWCLGQRDLTFSVSFITTGFKLHIIKTVGGVEEELFLTKYVKTSGRKFTCRAIKLRSKGNKKCTVKYRHRRRRRGRRSRRGKKGKRGLKKSKRKGKKGKKSGSRSKSVGGKRKKGKKSGSRSRSVGGKRRKGKKSGSRSRSVGGKRKKGKKSGSRSKSVGGKRKKGKKSGSRSKSVGGKRKKGKKSGSRSKSVGGKRKKGKKSGSRSKSVGGKRKKGKKSGSRSKSVGGKRKKGKKSGSRSKSVGGKRKKGKKSGSRSKSVGGKRKKGKKSGSRSKSVGGKRKKGKKSGSRSKSVGGKRKKGKKSGSRSKSVGGKRKKGKKSGSRSKSVGGKRKKGKKSGSRSKSVGGKRKKGKKSGSRSKSVGGKRKKGKKSGSRSKSVGGKRKKGKKSGSRSKSVGGKRKKGKKSGSRSKSVGGKRKKGKKSGSRSKSVGGKRKKGKKSGSRSKSVGGKRKKGKKSGSRSKSVGGKRKKGKKSGSRSKSVGGKRKKGKKSGSRSKSVGGKRKKGKKSGSRSKSVGGKRKKGKKSGSRSKSVGGKRKKGKKSGSRSKSVGGKRKKGKKSGSRSKSVGGKRKKGKKSGSRSKSVGGKRKKGKKSGSRSKSVGGKRKKGKKSGSRSKSVGGKRKKGKKSGSRSKSVGGKRKKGKKSGSRSKSVGGKRKKGKKSGSRSKSVGGKRKKGKKSGSRSGSKGGKRKKGKKPAPGKETAIVTKEEAETKVITVRPNTFQKIEGIAGYERSLDFSLDPKQGITFRLAERRNGKGKTLLFVIQNEWSYMQFAGQDLGRKIKTEKGILNSGKKSFWIKLPSSQDSEFWFELGFKGESKAYLRWSVSDTSFRPLYLDVSISVTKIVEETTEVFYPQWNVLSVPVSEQQKFEMESNEVALIALQPGKISKKGQIIAEFGSPSKPGCQFQKCMDKEATECAGKARVCRDNDDTDCVVKRADRSACNFAKKRSIWVQLVGGEYRMGVLGSDDAISSYRVSAALESDSGLKLAVGTRGDGKWRLF*

>Agib-Sfp8-like (g22445.t1)

MATSRLTVLLLAAMAATAIARSVPVFTCPTLQTNQDNDVKWHPSPVPSSHFTLHFKVAAVSDAKIVLAESKSDNCDRIVINIGKNRNSKSSIKRYPQAGKVSESTPGELKCEQFNEYWVQFDPSSVQVGRANQRAPFLKLDLDSGSPINPKVLGYGTSRNSVGLFSFEPFDDHYVDPCLNNPCQNGGKCDSSSGNGYECHCADGYIGEHCEDKPDPICPPGVELAYCLVDPCQYATCDAYPEAQCRSNYCGGCNAEFYDSDGNLVECKSPKNRPGICPTPPENMVGLCFNACEGDSDCPGERKCCSNGCGRVCKEPCKEVLCELFCENGFDVDPETGCEVCSCKPKECKPVLCKMACKNGYKKDEDGCQTCECEAPVTRPGLCPPVQEGMFGACANECGNDVDCPGQTKCCSNGCSHVCREPCSEVMCLMFCENGFDVDPKTGCQTCSCKPKECKGLLTCRMACENGFKKDKDGCEICECEAPVTRPGLCPPVQEGMFGACASDCENDADCPGETKKCCSNGCGHVCREPCAEAMCAMFCENGFQIDDETGCEICKCKPKECSPLACRMACENGLKKDDDGCDICECEVSCPLLKCSQNCASYKTDERGCHTCECEDCPLVRCRMACKNGFKKDENGCDTCECEACSPVLCRLGCKNGFKTNEQGCKICACAEWPEPEPEPEEEEEEEEEEEVFECPGDTKEVTIATEVDPSEPQEFEVEKEEPTDVIFHSGSGEIVTVEVEKTHAYILGVFDVKIKTVELPSWCWKIRSLKLIVRFVTEGFNVFVRSGSEDTPLMEYRKPNRGLFTCGRIGFRSRGKRQSKLYYRRKRRGRKGKKGRKRPRDKKGSRPKKNKSRGSRSSRPRNNKPQKNKPKNRSGSSSGLKPKKKNKPKNRSSNSSRAKPKKNKPKKRSSNSSGAKPKKNKPKKRSSNSSGAKPKKNKPKKRSSNSSRSKPKKNKPKKRSSNSSGAKPKKNKPKKRSSNSSRAKPKKNKPKNRSSNSSRAKPKNKNKPKNRSSNSSGLKPKKKNKPKNRSSNSSGAKPKKNKPKKRSSNSSRAKPKKNKPKKRSSNSSRAKPKKNKPKNRSSNSSRGKPKKNKPKKRSSNSSGAKPKKNKPKKRSSNSSGAKPKKNKPKNRSSNSSRAKPKKNKPKKRSSNSSGGKPKKNKPKKRSSNSSGAKPKKNKPKKRSSNSSGAKPKKNKPKKRSSNSSGAKPKKNKPKNRSSNSSRAKPKKKNKPKNRSSNSSRAKPKKNKPKNRSSNSSGLKPKKNKPKKRSSNSSGAKPKKNKPKNRSSNSSRAKPKKKNKPKNRSSNSSRAKPKKNKPKNRSSNSSGLKPKKNKPKKRSSNSSGAKPKKNKPKNRSSNSSRSKPKKNKPKKRSSNSSGAKPKKNKPKNRSSNSSRAKPKKNKPKKRSSNSSGAKPKKNKPKNRSSNSSGAKPKKNKPKNRSSNSSGAKPKKKNKPKNRSGSSRESNERPQRRPKDDDEDVFECTGGSQEVIIAKEVDSSQPQEFEIEKDDPVDIIFHSQGGERIEIEVEKKYIYILGSTGIKLKTKKLPSFCWGLRTLRLVVRFVTNGFDVFIVSSSGELRISEFREPKQRIFRCGSIGFKGRKSSRLYYKKKGRGGPKKNKPKNKSGSSSGAKPKKNKPKKNKSGSSSGAKPKKKNKPKKNKSGSSSGARPKKNKPKKNKSGSSGGSRQRNKPKGSRGPKISKGGFSSRSHKVPVKPKGKASKKKPRQKGSDSNERPQRRPKDDDEDVFECTGGSQEVIIAKEVDSSQPQEFEIEKDDPVDIVFHSQSGERIEIEVEKKYIYILGSTGIKLKTKKLPSFCWGLRTLRLVVRFVTNGFDVFIVSSSGELRISEFREPKQRIFRCGSIGFKGRKSSRLYYKKKGRGGSKKNKPRNRSGSSSGSKPKKNKPKNRSGSSSGLKPKKKPRISSGLKPKKPKNNSGSSSGSKHKKNKPKNRSGSSSGLKHKKKPRISSGLKPKKPRNKSGSSSGSKPKKKNKPKNRSGSSSGSKPKKKNKPRNRSGSSSGNKKPKKPKTRGSSSSSSNSRKRPGKKPGKKPGKKPGKKPKAPEEDEEFESVPGSEVIITEVVDTSEPQEFVVERGDPVDIVLHSTDGQLLKLEIESRYIYILSISGARLQTADLPSWARKLQSLRIVVRFVTYGFNVFLIRSSGEVEVLEYREPDQRVFVCGTIGFEAKGNKKQKIHYKHKGKGGKKSSSKPRIRVEKTHEQETVIEEHEEVQSQTIGIAADTYQRIEGIASFESSLSFSFDPEDGITFRLSEEQNGDGKSLLFVIQSDWSYMQYNGHDLGDRFQTPAGVLDSGSKSFTIKLPGSSSSEFWFELWFQGESSAYLRQMVSDTSFRPKYIDVAIHVMKVYPNWMDMGAVTDSKYQFKLESAEPGLVSIQSSKSGAGQLVAEFGSPSSKGCKIQKCKDKEATDCTDVAHPDDSTACDGLGTSRSIWVQFADGILHMGTWAGDQFTEICSYDASGWLEGAGSSQKLAIGTRGSGEWQAFG*

>Agib-Sfp9 (g820.t1 + Unigene11005)

MRNSPGVVPVRFCVTLVLFAVVLGVLLPLCSGQQPRGDEPFAPPKESPEIQKVEDQLVDEEAAQEKLKKIRNRAFGAGYLAMAPKILCAGSQEKVFITFVNFSQPVDVMFAVMENEETSLVVTQLKVFKTPCGCVEIDLPVIDKPRMVVSLVMYAKRTLMQCEEFEIVDSIKVYLDACNSETFIETDKPIYKPGQEVQFRVLTLLSDLRPDLSDVSKIWIESPAGIHMAQWLAVKTMDGLIDLSMPMSTDPPMGEWKIKVRHHDREFSQSFTVGEYVLPKFEVLILGPDYVVAPAGKKDVLVCGKYTHGQPVRGSIKLHVSVSTIPDAEIDMFEDTDANGCHVFEVDLAEIPWKTLRYINPSRTKLVIKAEFEEAATRTVIEKTIDDIVITRKPFELKFSVPSTFKPGLPFSGMLLFTDPSGKPLSGESEIIASGGKSEDLYREMVISNEKGIAFFTIEDVPHDVEFINLRAESQGSNSRNSPKAYSNVQPQYSPSKSYIHIDPINERAMINSYQSLTIHMTSQEPEYNGVYLHTVMMARGNILLDVESIIPPEEIDAFRRPGQYGIYPVNTDEMGMKEYTYSMHMVASDVPVHILEKHKVKTTRRRFKISYDMSPSVTVMVYYIRGNGEVVADTVVIPVEEAFQNQVDVNFAEETKQPGEHTTLNILAKPSSLCAYGVVDKSVHLLGGDNRITKEKVFKALEDIQLSAEGGFAEPQSKRCGDGGWGGGGPMPVFGGMRGMPSPSPNLKDASQSFKDLGVVYLTNLQVETAPCPKVHPWLYRRPEVMEDGMVVPLAMPMLEMAEGPPMVAEAEVAVSAVEGGGAPDVRSYFPETWLYDLIRVNSDGSANIPIQVPHTITEWIGHGFCTSTRFGAGVSELTRLTAFQPFFVDMTLPYSVIRNEYVPVTVVVFNYVTKCLVVKLTLQPSDDFEVEEQNRREHICVCGGQSVPSSFYIKASTIGSIPIEVHAVSVEDSDSWCHGQDMDTSQNGFSDAIRKPLLIKPEGVETEQVFSAYFCPDDYEGGKYEEVISLQDLPDNYVNGSERGIVTVTGDMLGPTIDNLDHLLRIPTGCGEQNMIGFVPNIYILHYLKGINKLNPDIEAKAKENMEIGYQRELNYRHPDGSYSAFGDRDPSGSTWLTAFVVRSFSQARHHIYVDQQDLDKSTDWLLRQQRESDGCFESHGRVIHKDMMGSVNDVTTLTAYVVISLIEAEVPYDDPIIQRAVGCLDAKIDISSADMYTLAIAGYAFILSGFPHKDDLMNRLAMLAVDSDDGLRHWEGRPEPVPAGDRRPYLHHQASSQHIEITSYILLTYTRAYAKTQALLYGNPVARWIIGQRNANGGFASTQDTVMALQALAEYGMMAYVGGHQNVKLQIKFSCEPRTHWKYVRDHNRLLLQTLPIPQVPVQVKMSAEGPGCAMTQVIVTYNVIPEEPEEPEEPPFEISFDYDENKDNNPSPCSTYNMHVCARYNGEDEFSNMAVVQVRMVSGFEADSNAIRMLRSLPSPNLKRIEEEGKDIFFYFEQLGHEDTCVDFIARRDIFVKAPRDGVITVFDYYEKALSSSRLYNFKCQGIA*

>Agib-Sfp10like (g1515.t1)

MQRRSVHHYSCGNNNESCDHNHSDVHVHDGRILYGANGRRPSTTQTFRNVLDSSGQPLVQETTLNGDRPVTLILASPVTGIKELRLEILSIGDSNEGSLRVDFLGCKEEVSTTTPAATTTKVVTTTTQTSTSTTAGYCMEPMDGDQGLEGGRSKSPDSEEIRFILSVRDSTTQTFRDVLDSSGQPLVQETTLNGDRPVTLILASPVTGIKELRLEILSIGDSNEGSLRVDFLGCKEEVSTTTPAATTTKVVTTTTQTSTSTTAGYCMEPMDGDQGLEGGRSKSPDSEGQSSDINAEEPWTFKLQDNPEDNRQENPTLDVQFNTRVELHALRLQGNTDDSPEIRFILSVRDSTTQTFRDVLDSSGQPLVQETTLNGDRPVTLILASPVTGIKELRLEILSIGDSNEGSLRVDFLGCKEEVSTTTPAATTTKVVTTTTQTSTSTTAGYCMEPMDGDQGLEGGRSKSPDSEEIRFILSVRDSTTQTFRDVLDSSGQPLVQETTLNGDRPVTLILASPVTGIKELRLEILSIGDSNEGSLRVDFLGCKEEVSTTTPAATTTKVVTTTTQTSTSTTAGYCMEPMDGDQGLEGGRSKSPDSEGRTRPPSTTTPQCEEGTTMELDECRSCDCFNGTYSCYYDCHKRPDSCAVGEQLVSFQNKCCECVSITTTLTSMLTTLECLDPFVVGEPTCCQYMDKCEIDPIFSGAENCNACRTPLVFNGTDCVFPNECLCKDKEGFHKPGDNWENPSKNCSYCTCFRNQIDCHETLCNNKLDCSEDDYIYLPGDCCATCKGEQKITTTKKPLELPCYHEHSGRWYNRGEHFAQGACEECICLDEVICTISKCHLTEDDCAEGEIVMATEDMCCECRAVQTTTVIPTTTLPACTDPYVYRESCECHVMCSTLGEDCTDVKCEKGCFCPEGKLMNDKECIPEHQCPCTDILGIKRQFGEMWSQSDCERCICEEDMAINCTKICTLDCQEDEVLIEPDGSMCCYCEKIPTTTVYPTTMLLPSTSTASPSGCLGCYDEKSETCHEPETSWRDDPCTTCECQYKNEFALTCKETQCGEDLECKEGHVLIKDDGDCCYHCVPDICVGDFNCNSTHCIPNKWQCDGSVDCDNGYDEENCPLPTTPPPPPPSCASSEEVTVCKDCRERACQDFACYEMPQDLCCECKQGTVFNGTTCVKPKECKCLDENGNIRLPFETWETEECEECKCQFNRITCYPAATCQTTTPEPRTMPPQPRYCDETCLCQLDCDGEFVDEKCSFVVPNECNDTCLCGPGSEKDKVTGRSCVIRPTPEECEKTTTAEVSTTTPAATTRRKYFSPFNV*

>Agib-Sfp12like (g1518.t1)

MASREQPVYECDNSTCVPGCICPVGMLEQNTKCVQPEECPCYYNGTFYANEKVWTQDNCTMCKWKDVDNCLVDCHEFCEIKDACGEEMDLVNEDPDDMICCHCVPKERCKHDEDPVDVYRSVGEVWMPNVCEECECSQSGNVICRETVCQDPPCQLGYEPHQVEGECCAQCKHIPQPTTPEPATTTVSLDCPETCYIGEPLSCEQQEAFTSRANTAPFVEQSECSPMFSDMFNVQPNCTCKEAFIRDVTGSEVEEQLGYTFNSGMCILLDPCEEDCEDICHVNCNKSRAEYELFYNTTTCKSEFAKFFNASTFCLCKEGYVKDEEGEAVEQLGFQYNTSMCIEVESCKPDCVHDNHFLYEGESVMQDCQICECRRSSTIPPESTAPSTIAEYSMVCYPLNECTTEYCLEPIDSKSGLLSDITGGGSVSPDKANGYVQLTDLPITSKPGEEPSMLDARFSRAIDIKAIRFRLLSTVSSTTQTSTEEKYTLLTSNLALHGKKRGNEKFSPLLEAGTAQDQIKIFEVTVDTNLPEKLLFPGDDRALQGIEELRIHFRSVTGGESAKLQVDILGCANDYCLEPMDGERGLEPEVKAVGDLTVDSQTSYLTITKLPIDPSSSDIPSVEFLFRQPIKLTAVVLTSRSPQATSAPTGQPAASTTTPISAAGEQTTDVVFSVSTKKPGDENLTPLIDDNTNQPKLITVRLEGSNPEIKYLPIGEATLEGVTEVAVQIQSVSDDEATTFELHILGCTEEYTTQPTTRTTRVTTTVTTTTPPSSTTQGYCLDPMDNDSGLLSDVTGRGSVLTDESRRDIQLTDLPITPGAGQSSTLDSEFNRRVNVRAIRFRLQPTVSSTTPAGAAEEITPLRADLVLSVLKPGDTDFTPVLDGETNQEKVFSVTLDSNLPERLLLPIDDPALQGVEQLRIEFRSVTGGESARLQVDILGCAEEYTTTEMTTKVTTVTTPTTVSEETTSSQTTTSIMSTTPGYCLEPMDGEKGLEPDVKAVGDLTVDSQTSYLTITKLPIDPSSSDIPSVEFLFRQPIKLTAVVLTSRSPQATSAPTGQPAASTTTPISAAGEQTTDVVFSVSTKKPGDENLTPLIDDNTNQPKLITVRLEGSNPEIKYLPIDEATLEGVTEVAVQIQSVSDDEATTFELHILGCTEEYTTQPTTRTTRVTTTVTTTTPPSSTTQGYCLDPMDNDSGLLSDVTGRGSVLTDESRRDIQLTDLPITPGAGQSSTLDSEFNRRVNVRAIRFRLQPTVSSTTPAGAAEEITPLRADLVLSVLKPGDTDFTPVLDGETNQEKVFSVTLDSNLPERLLLPIDDPALQGVEQLRIEFRSVTGGESARLQVDILGCAEEYTTTEMTTKVTTVTTPTTVSEETTSSQTTTSIMSTTPGYCLEPMDGEKGLEPDVKAVGDLTVDSQTSYLTITKLPIDPSSSDIPSVEFLFRQPIKLTAVVLTSRSPQATSAPTGQPAASTTTPISAAGEQTTDVVFSVSTKKPGDENLTPLIDDNTNQPKLITVRLEGSNPEIKYLPIDEATLEGVTEVAVQIQSVSDDEATTFELHILGCTEEYTTQPTTRTTRVTTTVTTTTPPSSTTQGYCLDPMDNDSGLLSDVTGRGSVLTDESRRDIQLTDLPITPGAGQSSTLDSEFNRRVNVRAIRFRLQPTVSSTTPAGAAEEITPLRADLVLSVLKPGDTDFTPVLDGETNQEKVFSVTLDSNLPERLLLPIDDPALQGVEQLRIEFRSVTGGESARLQVDILGCAEEYTTTEMTTKVTTVTTPTTVSEETTSSQTTTSIMSTTPGYCLEPMDGEKGLEPDVKAVGDLTVDSQTSYLTITKLPIDPSSSDIPSVEFLFRQPIKLTAVVLTSRSPQATSAPTGQPAASTTTPISAAGEQTTDVVFSVSTKKPGDENLTPLIDDNTNQPKLITVRLEGSNPEIKYLPIDEATLEGVTEVAVQIQSVSDDEATTFELHILGCTEEYTTQPTTRTTRVTTTVTTTTPPSSTTQGYCLDPMDNDSGLLSDVTGRGSVLTDESRRDIQLTDLPITPGAGQSSTLDSEFNRRVNVRAIRFRLQPTVSSTTPAGAAEEITPLRADLVLSVLKPGDTDFTPVLDGETNQEKVFSVTLDSNLPERLLLPIDDPALQGVEQLRIEFRSVTGGESARLQVDILGCAEEYTTTEMTTKVTTVTTPTTVSEETTSSQTTTSIMSTTPGYCLEPMDGEKGLEPDVKAVGDLTVDSQTSYLTITKLPIDPSSSDIPSVEFLFRQPIKLTAVVLTSRSPQATSAPTGQPAASTTTPISAAGEQTTDVVFSVSTKKPGDENLTPLIDDNTNQPKLITVRLEGSNPEIKYLPIDEATLEGVTEVAVQIQSVSDDEATTFELHILGCTEEYTTQPTTRTTRVTTTVTTTTPPSSTTQGYCLDPMDNDSGLLSDVTGRGSVLTDESRRDIQLTDLPITPGAGQSSTLDSEFNRRVNVRAIRFRLQPTVSSTTPAGAAEEITPLRADLVLSVLKPGDTDFTPVLDGETNQEKVFSVTLDSNLPERLLLPIDDPALQGVEQLRIEFRSVTGGESARLQVDILGCAEEYTTTEMTTKVTTVTTPTTVSEETTSSQTTTSIMSTTPGYCLEPMDGEKGLEPDVKAVGDLTVDSQTSYLTITKLPIDPSSSDIPSVEFLFRQPIKLTAVVLTSRSPQATSAPTGQPAASTTTPISAAGEQTTDVVFSVSTKKPGDENLTPLIDDNTNQPKLITVRLEGSNPEIKYLPIDEATLEGVTEVAVQIQSVSDDEATTFELHILGCTEEYTTQPTTRTTRVTTTVTTTTPPSSTTQGYCLDPMDNDSGLLSDVTGRGSVLTDESRRDIQLTDLPITPGAGQSSTLDSEFNRRVNVRAIRFRLQPTVSSTTPAGAAEEITPLRADLVLSVLKPGDTDFTPVLDGETNQEKVFSVTLDSNLPERLLLPIDDPALQGVEQLRIEFRSVTGGESARLQVDILGCAEEYTTTEMTTKVTTVTTPTTVSEETTSSQTTTSIMSTTPGYCLEPMDGEKGLEPDVKAVGDLTVDSQTSYLTITKLPIDPSSSDIPSVEFLFRQPIKLTAVVLTSRSPQATSAPTGQPAASTTTPISAAGEQTTDVVFSVSTKKPGDENLTPLIDDNTNQPKLITVRLEGSNPEIKYLPIDEATLEGVTEVAVQIQSVSDDEATTFELHILGCTEEYTTQPTTRTTRVTTTVTTTTPPSSTTQGYCLDPMDNDSGLLSDVTGRGSVLTDESRRDIQLTDLPITPGAGQSSTLDSEFNRRVNVRAIRFRLQPTVSSTTPAGAAEEITPLRADLVLSVLKPGDTDFTPVLDGETNQEKVFSVTLDSNLPERLLLPIDDPALQGVEQLRIEFRSVTGGESARLQVDILGCAEEYTTTEMTTKVTTVTTPTTVSEETTSSQTTTSIMSTTPGYCLEPMDGEKGLEPDVKAVGDLTVDSQTSYLTITKLPIDPSSSDIPSVEFLFRQPINVSTKKPGDENLTPLIDDNTNQPKLITVRLEGSNPEIKYLPIDEATLEGVTEVAVQIQSVSDDEATTFELHILGCTEEYTTQPTTRTTRVTTTVTTTTPPSSTTQGYCLDPMDNDSGLLSDVTGRGSVLTDESRRDIQLTDLPITPGAGQSSTLDSEFNRRVNVRAIRFRLQPTVSSTTPAGAAEEITPLRADLVLSVLKPGDTDFTPVLDGETNQEKVFSVTLDSNLPERLLLPIDDPALQGVEQLRIEFRSVTGGESARLQVDILGCAEEYTTTEMTTKVTTVTTPTTVSEETTSSQTTTSIMSTTPGYCLEPMDGEKGLEPDVKAVGDLTVDSQTSYLTITKLPIDPSSSDIPSVEFLFRQPIKLTAVVLTSRSPQATSAPTGQPAASTTTPISAAGEQTTDVVFSVSTKKPGDENLTPLIDDNTNQPKLITVRLEGSNPEIKYLPIDEATLEGVTEVAVQIQSVSDDEATTFELHILGCTEEYTTQPTTRTTRVTTTVTTTTPPSSTTQG

YCLDPMDNDSGLLSDVTGRGSVLTDESRRDIQLTDLPITPGAGQSSTLDSEFNRRVNVRAIRFRLQPTVSSTTPAGAAEEITPLRADLVLSVLKPGDTDFTPVLDGETNQEKVFSVTLDSNLPERLLLPIDDPALQGVEQLRIEFRSVTGGESARLQVDILGCAEEYTTTEMTTKVTTVTTPTTVSEETTSSQTTTSIMSTTPGYCLEPMDGEKGLEPDVKAVGDLTVDSQTSYLTITKLPIDPSSSDIPSVEFLFRQPIKLTAVVLTSRSPQATSAPTGQPAASTTTPISAAGEQTTDVVFSVSTKKPGDENLTPLIDDNTNQPKLITVRLEGSNPEIKYLPIDEATLEGVTEVAVQIQSVSDDEATTFELHILGCTEEYTTQPTTRTTRVTTTVTTTTPPSSTTQGYCLDPMDNDSGLLSDVTGRGSVLTDESRRDIQLTDLPITPGAGQSSTLDSEFNRRVNVRAIRFRLQPTVSSTTPAGAAEEITPLRADLVLSVLKPGDTDFTPVLDGETNQEKVFSVTLDSNLPERLLLPIDDPALQGVEQLRIEFRSVTGGESARLQVDILGCAEEYTTTEMTTKVTTVTTPTTVSEETTSSQTTTSIMSTTPGYCLEPMDGEKGLEPDVKAVGDLTVDSQTSYLTITKLPIDPSSSDIPSVEFLFRQPIKLTAVVLTSRSPQATSAPTGQPAASTTTPISAAGEQTTDVVFSVSTKKPGDENLTPLIDDNTNQPKLITVRLEGSNPEIKYLPIDEATLEGVTEVAVQIQSVSDDEATTFELHILGCTEEYTTQPTTRTTRVTTTVTTTTPPSSTTQGYCLDPMDNDSGLLSDVTGRGSVLTDESRRDIQLTDLPITPGAGQSSTLDSEFNRRVNVRAIRFRLQPTVSSTTPAGAAEEITPLRADLVLSVLKPGDTDFTPVLDGETNQEKVFSVTLDSNLPERLLLPIDDPALQGVEQLRIEFRSVTGGESARLQVDILGCAEEYTTTEMTTKVTTVTTPTTVSEETTSSQTTTSIMSTTPGYCLEPMDGEKGLEPDVKAVGDLTVDSQTSYLTITKLPIDPSSSDIPSVEFLFRQPIKLTAVVLTSRSPQATSAPTGQPAASTTTPISAAGEQTTDVVFSVSTKKPGDENLTPLIDDNTNQPKLITVRLEGSNPEIKYLPIDEATLEGVTEVAVQIQSVSDDEATTFELHILGCTEEYTTQPTTRTTRVTTTVTTTTPPSSTTQGYCLDPMDNDSGLLSDVTGRGSVLTDESRRDIQLTDLPITPGAGQSSTLDSEFNRRVNVRAIRFRLQPTVSSTTPAGAAEEITPLRADLVLSVLKPGDTDFTPVLDGETNQEKVFSVTLDSNLPERLLLPIDDPALQGVEQLRIEFRSVTGGESARLQVDILGCAEEYTTTEMTTKVTTVTTPTTVSEETTSSQTTTSIMSTTPGYCLEPMDGEKGLEPDVKAVGDLTVDSQTSYLTITKLPIDPSSSDIPSVEFLFRQPIKLTAVVLTSRSPQATSAPTGQPAASTTTPISAAGEQTTDVVFSVSTKKPGDENLTPLIDDNTNQPKLITVRLEGSNPEIKYLPIDEATLEGVTEVAVQIQSVSDDEATTFELHILGCTEEYTTQPTTRTTRVTTTVTTTTPPSSTTQGYCLDPMDNDSGLLSDVTGRGSVLTDESRRDIQLTDLPITPGAGQSSTLDSEFNRRVNVRAIRFRLQPTVSSTTPAGAAEEITPLRADLVLSVLKPGDTDFTPVLDGETNQEKVFSVTLDSNLPERLLLPIDDPALQGVEQLRIEFRSVTGGESARLQVDILGCAEEYTTTEMTTKVTTVTTPTTVSEETTSSQTTTSIMSTTPGYCLEPMDGEKGLEPDVKAVGDLTVDSQTSYLTITKLPIDPSSSDIPSVEFLFRQPIKLTAVVLTSRSPQATSAPTGQPAASTTTPISAAGEQTTDVVFSVSTKKPGDENLTPLIDDNTNQPKLITVRLEGSNPEIKYLPIDEATLEGVTEVAVQIQSVSDDEATTFELHILGCTEEYTTQPTTRTTRVTTTVTTTTPPSSTTQGYCLDPMDNDSGLLSDVTGRGSVLTDESRRDIQLTDLPITPGAGQSSTLDSEFNRRVNVRAIRFRLQPTVSSTTPAGAAEEITPLRADLVLSVLKPGDTDFTPVLDGETNQEKVFSVTLDSNLPERLLLPIDDPALQGVEQLRIEFRSVTGGESARLQVDILGCAEEYTTTEMTTKVTTVTTPTTVSEETTSSQTTTSIMSTTPGYCLEPMDGEKGLEPDVKAVGDLTVDSQTSYLTITKLPIDPSSSDIPSVEFLFRQPIKLTAVVLTSRSPQATSAPTGQPAASTTTPISAAGEQTTDVVFSVSTKKPGDENLTPLIDDNTNQPKLITVRLEGSNPEIKYLPIDEATLEGVTEVAVQIQSVSDDEATTFELHILGCTEEYTTQPTTRTTRVTTTVTTTTPPSSTTQGYCLDPMDNDSGLLSDVTGRGSVLTDESRRDIQLTDLPITPGAGQSSTLDSEFNRRVNVRAIRFRLQPTVSSTTPAGAAEEITPLRADLVLSVLKPGDTDFTPVLDGETNQEKVFSVTLDSNLPERLLLPIDDPALQGVEQLRIEFRSVTGGESARLQVDILGCAEEYTTTEMTTKVTTVTTPTTVSEETTSSQTTTSIMSTTPGYCLEPMDGEKGLEPDVKAVGDLTVDSQTSYLTITKLPIDPSSSDIPSVEFLFRQPIKLTAVVLTSRSPQATSAPTGQPAASTTTPISAAGEQTTDVVFSVSTKKPGDENLTPLIDDNTNQPKLITVRLEGSNPEIKYLPIDEATLEGVTEVAVQIQSVSDDEATTFELHILGCTEEYTTQPTTRTTRVTTTVTTTTPPSSTTQGYCLDPMDNDSGLLSDVTGRGSVLTDESRRDIQLTDLPITPGAGQSSTLDSEFNRRVNVRAIRFRLQPTVSSTTPAGAAEEITPLRADLVLSVLKPGDTDFTPVLDGETNQEKVFSVTLDSNLPERLLLPIDDPALQGVEQLRIEFRSVTGGESARLQVDILGCAEEYTTTEMTTKVTTVTTPTTVSEETTSSQTTTSIMSTTPGYCLEPMDGEKGLEPDVKAVGDLTVDSQTSYLTITKLPIDPSSSDIPSVEFLFRQPIKLTAVVLTSRSPQATSAPTGQPAASTTTPISAAGEQTTDVVFSVSTKKPGDENLTPLIDDNTNQPKLITVRLEGSNPEIKYLPIDEATLEGVTEVAVQIQSVSDDEATTFELHILGCTEEYTTQPTTRTTRVTTTVTTTTPPSSTTQGYCLDPMDNDSGLLSDVTGRGSVLTDESRRDIQLTDLPITPGAGQSSTLDSEFNRRVNVRAIRFRLQPTVSSTTPAGAAEEITPLRADLVLSVLKPGDTDFTPVLDGETNQEKVFSVTLDSNLPERLLLPIDDPALQGVEQLRIEFRSVTGGESARLQVDILGCAEEYTTTEMTTKVTTVTTPTTVSEETTSSQTTTSIMSTTPGYCLEPMDGEKGLEPDVKAVGDLTVDSQTSYLTITKLPIDPSSSDIPSVEFLFRQPIKLTAVVLTSRSPQATSAPTGQPAASTTTPISAAGEQTTDVVFSVSTKKPGDENLTPLIDDNTNQPKLITVRLEGSNPEIKYLPIDEATLEGVTEVAVQIQSVSDDEATTFELHILGCTEEYTTQPTTRTTRVTTTVTTTTPPSSTTQGYCLDPMDNDSGLLSDVTGRGSVLTDESRRDIQLTDLPITPGAGQSSTLDSEFNRRVNVRAIRFRLQPTVSSTTPAGAAEEITPLRADLVLSVLKPGDTDFTPVLDGETNQEKVFSVTLDSNLPERLLLPIDDPALQGVEQLRIEFRSVTGGESARLQVDILGCAEEYTTTEMTTKVTTVTTPTTVSEETTSSQTTTSIMSTTPGYCLEPMDGEKGLEPDVKAVGDLTVDSQTSYLTITKLPIDPSSSDIPSVEFLFRQPIKLTAVVLTSRSPQATSAPTGQPAASTTTPISAAGEQTTDVVFSVSTKKPGDENLTPLIDDNTNQPKLITVRLEGSNPEIKYLPIDEATLEGVTEVAVQIQSVSDDEATTFELHILGCTEEYTTQPTTRTTRVTTTVTTTTPPSSTTQGYCLDPMDNDSGLLSDVTGRGSVLTDESRRDIQLTDLPITPGAGQSSTLDSEFNRRVNVRAIRFRLQPTVSSTTPAGAAEEITPLRADLVLSVLKPGDTDFTPVLDGETNQEKVFSVTLDSNLPERLLLPIDDPALQGVEQLRIEFRSVTGGESARLQVDILGCAEEYTTTEMTTKVTTVTTPTTVSEETTSSQTTTSIMSTTPGYCLEPMDGEKGLEPDVKAVGDLTVDSQTSYLTITKLPIDPSSSDIPSVEFLFRQPIKLTAVVLTSRSPQATSAPTGQPAASTTTPISAAGEQTTDVVFSVSTKKPGDENLTPLIDDNTNQPKLITVRLEGSNPEIKYLPIDEATLEGVTEVAVQIQSVSDDEATTFELHILGCTEEYTTQPTTRTTRVTTTVTTTTPPSSTTQGYCLDPMDNDSGLLSDVTGRGSVLTDESRRDIQLTDLPITPGAGQSSTLDSEFNRRVNVRAIRFRLQPTVSSTTPAGAAEEITPLRADLVLSVLKPGDTDFTPVLDGETNQEKVFSVTLDSNLPERLLLPIDDPALQGVEQLRIEFRSVTGGESARLQVDILGCAEEYTTTEMTTKVTTVTTPTTVSEETTSSQTTTSIMSTTPGYCLEPMDGEKGLEPDVKAVGDLTVDSQTSYLTITKLPIDPSSSDIPSVEFLFRQPIKLTAVVLTSRSPQATSAPTGQPAASTTTPISAAGEQTTDVVFSVSTKKPGDENLTPLIDDNTNQPKLITVRLEGSNPEIKYLPIDEATLEGVTEVAVQIQSVSDDEATTFELHILGCTEEYTTQPTTRTTRVTTTVTTTTPPSSTTQGYCLDPMDNDSGLLSDVTGRGSVLTDESRRDIQLTDLPITPGAGQSSTLDSEFNRRVNVRAIRFRLQPTVSSTTPAGAAEEITPLRADLVLSVLKPGDTDFTPVLDGETNQEKVFSVTLDSNLPERLLLPIDDPALQGVEQLRIEFRSVTGGESARLQVDILGCAEEYTTTEMTTKVTTVTTPTTVSEETTSSQTTTSRHPITEPTTRSTTVTTTRMTTTSPAPTTQGYCLETLNSESGLLSNVEPQGLSVLDESLGLLQLQDLPITEGAAESPSLDSTFNRRIIARAISLRLLPTSSTTPAGTGAEPTSRQLSFTVQVKKPGDQEYSPLREASSDQEKLFQANLLEDQSKTVLLPSDDATLQGALQLRIQFRTVSGVGSARLEVHILGCEEEYTTTEMTTTVTTVTTPTTTVAEETTTSRSTTSEISTTPGYCQEEMDGEEGLESEVTADGTLTIDDQTSYVTIPELPISQPSAGSFPSVERKFRRRVRITALRTTLRSSSQAGEGTTTAVPAAGEQPIEITAVVLTKKPGDNSFSPLMDESTNQPKLITITLNGDQPASTPLPEDEDALDDVTEMRLEFRSVLGVDEITFEQHVLGCIKEYTTTEPTTRSTTVTTTRMTTTSPAPTTQGYCLETLNSESGLLSNVEPQGLSVLDESLGLLQLQDLPITEGAAESPSLDSTFNRRIIARAISLRLLPTSSTTPAGTGAEPTSRQLSFTVQVKKPGDQEYSPLREASSDQEKIFQANLLEDQSKTVLLPSDDATLQGALQLRIQFRTVSGVGSARLEVHILGCEEEYTTTEMTTTVTTVTTPTTTVTEETTTSRSTTSEISTTPGYCQEEMDGEEGLESEVTADGTLTIDDQTSYVTIPELPISQSAGSFPSVERKFRRRVRITALRTTLRSSSQAGEGTTTAVPAAGEQPIEITAVVLTKKPGDNSFSPLMDESTNQPKLITITLNGDQPASTPLPEDEDALDDVTEMRLEFRSVLGVDEITFEQHVLGCIKEYTTTEPTTRSTTVTTTRMTTTSPAPTTQGYCLETLNSESGLLSNVEPQGLSVLDESLGLLQLQDLPITEGAAESPSLDSTFNRRIIARAISLRLLPTSSTTPAGTGAEPTSRQLSFTVQVKKPGDQEYSPLREASSDQEKLFQANLLEDQSKTVLLPSDDATLQGALQLRIQFRTVSGVGSARLEVHILGCEEEYTTTEMTTTVTTVTTPTTTVAEETTTSRSTTSEISTTPGYCQEEMDGEEGLESEVTADGTLTIDDQTSYVTIPELPISQPSAGSFPSVERKFRRRVRITALRTTLRSSSQAGEGTTTAVPAAGEQPIEITAVVLTKKPGDNSFSPLMDESTNQPKLITITLNGDQPASTPLPEDEDALDDVTEMRLEFRSVLGVDEITFEQHVLGCIKEYTTTEPTTRSTTVTTTRMTTTSPAPTTQGYCLETLNSESGLLSNVEPQGLSVLDESLGLLQLQDLPITEGAAESPSLDSTFNRRIIARAISLRLLPTSSTTPAGTGAEPTSRQLSFTVQVKKPGDQEYSPLREASSDQEKLFQANLLEDQSKTVLLPSDDATLQGALQLRIQFRTVSGVGSARLEVHILGCEEEYTTTEMTTTVTTVTTPTTTVAEETTTSRSTTSEISTTPGYCQEEMDGEEGLESEVTADGTLTIDDQTSYVTIPELPISQPSAGSFPSVERKFRRRVRITALRTTLRSSSQAGEGTTTAVPAAGEQPIEITAVVLTKKPGDNSFSPLMDESTNQPKLITITLNGDQPASTPLPEDEDALDDVTEMRLEFHSVLGVDEITFEQHVLGCIKEYTTTEPTTRSTTVTTTRMTTTSPAPTTQGYCLETLNSESGLLSNVEPQGLSVLDESLGLLQLQDLPITEGAAESPSLDSTFNRRIIARAISLRLLPTSSTTPAGTGAEPTSRQLSFTVQVKKPGDQEYSPLREASSDQEKIFQANLLEDQSKTVLLPSDDATLQGALQLRIQFRTVSGVGSARLEVHILGCEEEYTTTEMTTTVTTVTTPTTTVTEETTTSRSTTSEISTTPGYCQEEMDGEEGLESEVTADGTLTIDDQTSYVTIPELPISQSAGSFPSVERKFRRRVRITALRTTLRSSSQAGEGTTTAVPAAGEQPIEITAVVLTKKPGDNSFSPLMDESTNQPKLITITLNGDQPASTPLPEDEDALDDVTEMRLEFRSVLGVDEITFEQHVLGCIKEYTTTEPTTRSTTVTTTRMTTTSPAPTTQGYCLETLNSESGLLSNVEPQGLSVLDESLGLLQLQDLPITEGAAESPSLDSTFNRRIIARAISLRLLPTSSTTPAGTGAEPTSRQLSFTVQVKKPGDQEYSPLREASSDQEKIFQANLLEDQSKTVLLPSDDATLQGALQLRIQFRTVSGVGSARLEVHILGCEEEYTTTEMTTTVTTVTTPTTTVTEETTTSRSTTSEISTTPGYCQEEMDGEEGLESEVTADGTLTIDDQTSYVTIPELPISQSAGSFPSVERKFRRRVRITALRTTLRSSSQAGEGTTTAVPAAGEQPIEITAVVLTKKPGDNSFSPLMDESTNQPKLITITLNGDQPASTPLPEDEDALDDVTEMRLEFRSVLGVDEITFEQHVLGCIKEYTTTEPTTRSTTVTTTRMTTTSPAPTTQGYCLETLNSESGLLSNVEPQGLSVLDESLGLLQLQDLPITEGAAESPSLDSTFNRRIIARAISLRLLPTSSTTPAGTGAEPTSRQLSFTVQVKKPGDQEYSPLREASSDQEKIFQANLLEDQSKTVLLPSDDATLQGALQLRIQFRTVSGVGSARLEVHILGCEEEYTTTEMTTTVTTVTTPTTTVTEETTTSRSTTSEISTTPGYCQEEMDGEEGLESEVTADGTLTIDDQTSYVTIPELPISQPSAGSFPSVERKFRRRVRITALRTTLRSSSQAGEGTTTAVPAAGEQPIEITAVVLTKKPGDNSFSPLMDESTNQPKLITITLNGDQPASTPLPEDEDALDDVTEMRLEFRSVLGVDEITFEQHVLGCIKEYTTTEPTTRSTTVTTTRMTTTSPAPTTQGYCLETLNSESGLLSNVEPQGLSVLDESLGLLQLQDLPITEGAAESPSLDSTFNRRIIARAISLRLLPTSSTTPAGTGAEPTSRQLSFTVQVKKPGDQEYSPLREASSDQEKLFQANLLEDQSKTVLLPSDDATLQGALQLRIQFRTVSGVGSARLEVHILGCEEEYTTTEMTTTVTTVTTPTTTVAEETTTSRSTTSEISTTPGYCQEEMDGEEGLESEVTADGTLTIDDQTSYVTIPELPISQSAGSFPSVERKFRRRVRITALRTTLRSSSQAGEGTTTAVPAAGEQPIEITAVVLTKKPGDNSFSPLMDESTNQPKLITITLNGDQPASTPLPEDEDALDDVTEMRLEFRSVLGVDEITFEQHVLGCIKEYTTTEPTTRSTTVTTTRMTTTSPAPTTQGYCLETLNSESGLLSNVEPQGLSVLDESLGLLQLQDLPITEGAAESPSLDSTFNRRIIARAISLRLLPTSSTTPAGTGAEPTSRQLSFTVQVKKPGDQEYSPLREASSDQEKLFQANLLEDQSKTVLLPSDDATLQGALQLRIQFRTVSGVGSARLEVHILGCEEEYTTTEMTTTVTTVTTPTTTVAEETTTSRSTTSEISTTPGYCQEEMDGEEGLESEVTADGTLTIDDQTSYVTIPELPISQSAGSFPSVERKFRRRVRITALRTTLRSSSQAGEGTTTAVPAAGEQPIEITAVVLTKKPGDNSFSPLMDESTNQPKLITITLNGDQPASTPLPEDEDALDDVTEMRLEFRSVLGVDEITFEQHVLGCIKEYTTTEPTTRSTTVTTTRMTTTSPAPTTQGYCLETLNSESGLLSNVEPQGLSVLDESLGLLQLQDLPITEGAAESPSLDSTFNRRIIARAISLRLLPTSSTTPAGTGAEPTSRQLSFTVQVKKPGDQEYSPLREASSDQEKLFQANLLEDQSKTVLLPSDDATLQGALQLRIQFRTVSGVGSARLEVHILGCEEEYTTTEMTTTVTTVTTPTTTVAEETTTSRSTTSEISTTPGYCQEEMDGEEGLESEVTADGTLTIDDQTSYVTIPELPISQSAGSFPSVERKFRRRVRITALRTTLRSSSQAGEGTTTAVPAAGEQPIEITAVVLTKKPGDNSFSPLMDESTNQPKLITITLNGDQPASTPLPEDEDALDDVTEMRLEFRSVLGVDEITFEQHVLGCIKEYTTTEPTTRSTTVTTTRMTTTSPAPTTQGYCLETLNSESGLLSNVEPQGLSVLDESLGLLQLQDLPITEGAAESPSLDSTFNRRIIARAISLRLLPTSSTTPAGTGAEPTSRQLSFTVQVKKPGDQEYSPLREASSDQEKIFQANLLEDQSKTVLLPSDDATLQGALQLRIQFRTVSGVGSARLEVHILGCEEEYTTTEMTTTVTTVTTPTTTVTEETTTSRSTTSEISTTPGYCQEEMDGEEGLESEVTADGTLTIDDQTSYVTIPELPISQSAGSFPSVERKFRRRVRITALRTTLRSSSQAGEGTTTAVPAAGEQPIEITAVVLTKKPGDNSFSPLMDESTNQPKLITITLNGDQPASTPLPEDEDALDDVTEMRLEFRSVLGVDEITFEQHVLGCIKEYTTTEPTTRSTTVTTTRMTTTSPAPTTQGYCLETLNSESGLLSNVEPQGLSVLDESLGLLQLQDLPITEGAAESPSLDSTFNRRIIARAISLRLLPTSSTTPAGTGAEPTSRQLSFTVQVKKPGDQEYSPLREASSDQEKIFQANLLEDQSKTVLLPSDDATLQGALQLRIQFRTVSGVGSARLEVHILGCEEEYTTTEMTTTVTTVTTPTTTVTEETTTSRSTTSEISTTPGYCQEEMDGEEGLESEVTADGTLTIDDQTSYVTIPELPISQSAGSFPSVERKFRRRVRITALRTTLRSSSQAGEGTTTAVPAAGEQPIEITAVVLTKKPGDNSFSPLMDESTNQPKLITITLNGDQPASTPLPEDEDALDDVTEMRLEFRSVLGVDEITFEQHVLGCIKEYTTTEPTTRSTTVTTTRMTTTSPAPTTQGYCLETLNSESGLLSNVEPQGLSVLDESLGLLQLQDLPITEGAAESPSLDSTFNRRIIARAISLRLLPTSSTTPAGTGAEPTSRQLSFTVQVKKPGDQEYSPLREASSDQEKIFQANLLEDQSKTVLLPSDDATLQGALQLRIQFRTVSGVGSARLEVHILGCEEEYTTTEMTTTVTTVTTPTTTVAEETTTSRSTTSEISTTPGYCQEEMDGEEGLESEVTADGTLTIDDQTSYVTIPELPISQSAGSFPSVERKFRRRVRITALRTTLRSSSQAGEGTTTAVPAAGEQPIEITAVVLTKKPGDNSFSPLMDESTNQPKLITITLNGDQPASTPLPEDEDALDDVTEMRLEFRSVLGVDEITFEQHVLGCIKEYTTTEPTTRSTTVTTTRMTTTSPAPTTQGYCLETLNSESGLLSNVEPQGLSVLDESLGLLQLQDLPITEGAAESPSLDSTFNRRIIARAISLRLLPTSSTTPAGTGAEPTSRQLSFTVQVKKPGDQEYSPLREASSDQEKIFQANLLEDQSKTVLLPSDDATLQGALQLRIQFRTVSGVGSARLEVHILGCEEEYTTTEMTTTVTTVTTPTTTVTEETTTSRSTTSEISTTPGYCQEEMDGEEGLESEVTADGTLTIDDQTSYVTIPELPISQSAGSFPSVERKFRRRVRITALRTTLRSSSQAGEGTTTAVPAAGEQPIEITAVVLTKKPGDNSFSPLMDESTNQPKLITITLNGDQPASTPLPEDEDALDDVTEMRLEFRSVLGVDEITFEQHVLGCIKEYTTTEPTTRSTTVTTTRMTTTSPAPTTQGYCLETLNSESGLLSNVEPQGLSVLDESLGLLQLQDLPITEGAAESPSLDSTFNRRIIARAISLRLLPTSSTTPAGTGAEPTSRQLSFTVQVKKPGDQEYSPLREASSDQEKLFQANLLEDQSKTVLLPSDDATLQGALQLRIQFRTVSGVGSARLEVHILGCEEEYTTTEMTTTVTTVTTPTTTVAEETTTSRSTTSEISTTPGYCQEEMDGEEGLESEVTADGTLTIGDQTSYVTIPELPISQSAGSFPSVERKFRRRVRITALRTTLRSSSRAGEGTTTAVPAAGEQPIEITAVVLTKKPGDNSFSPLMDESTNQPKLITIT

LNGDQPASTPLPEDEDALDDVTEMRLEFRSVLGVDEITFEQHVLGCIKEYTTTEPTTRSTTVTTTRMTTTSPAPTTQGYCLETLNSESGLLSNVEPQGLSVLDESLGLLQLQDLPITEGAAESPSLDSTFNRRIIARAISLRLLPTSSTTPAGTGAEPTSRQLSFTVQVKKPGDQEYSPLREASSDQEKLFQANLLEDQSKTVLLPSDDATLQGALQLRIQFRTVSGVGSARLEVHILGCEEEYTTTEMTTTVTTVTTPTTTVAEETTTSRSTTSEISTTPGYCQEEMDGEEGLESEVTADGTLTIDDQTSYVTIPELPISQSAGSFPSVERKFRRRVRITALRTTLRSSSQAGEGTTTAVPAAGEQPIEITAVVLTKKLGDNSFSPLMDESTNQPKLITITLNGDQPASTPLPEDEDALDDVTEMRLEFRSVLGVDEITFEQHVLGCIKEYTTTEPTTRSTTVTTTRMTTTSPAPTTQGYCLETLNSESGLLSNVEPQGLSVLDESLGLLQLQDLPITEGAAESPSLDSTFNRRIIARAISLRLLPTSSTTPAGTGLEPTSRQLSFTVQVKKPGDQEYSPLREASSDQEKLFQANLLEDQSKTVLLPSDDATLQGALQLRIQFRTVSGVGSARLEVHILGCEEEYTTTEMTTTVTTVTTPTTTVTEETTTSRSTTSEISTTPGYCQEEMDGEEGLESEVTADGTLTIDDQTSYVTIPELPISQSAGSFPSVERKFRRRVRITALRTTLRSSSQAGEGTTTAVPAAGEQPIEITAVVLTKKPGDNSFSPLMDESTNQPKLITITLNGDQPASTPLPEDEDALDDVTEMRLEFRSVLGVDEITFEQHVLGCIKEYTTTEPTTRSTTVTTTRMTTTSPAPTTQGYCLETLNSESGLLSNVEPQGLSVLDESLGLLQLQDLPITEGAAESPSLDSTFNRRIIARAISLRLLPTSSTTPAGTGLEPTSRQLSFTVQVKKPGDQEYSPLREASSDQEKLFQANLLEDQSKTVLLPSDDATLQGALQLRIQFRTVSGVGSARLEVHILGCEEEYTTTEMTTTVTTVTTPTTTVTEETTTSRSTTSEISTTPGYCQEEMDGEEGLESEVTADGTLTIDDQTSYVTIPELPISQSAGSFPSVERKFRRRVRITALRTTLRSSSQAGEGTTTAVPAAGEQPIEITAVVLTKKLGDNSFSPLMDESTNQPKLITITLNGDQPASTPLPEDEDALDDVTEMRLEFRSVLGVDEITFEQHVLGCIKEYTTTEPTTRSTTVTTTRMTTTSPAPTTQGYCLETLNSESGLLSNVEPQGLSVLDESLGLLQLQDLPITEGAAESPSLDSTFNRRIIARAISLRLLPTSSTTPAGTGLEPTSRQLSFTVQVKKPGDQEYSPLREASSDQEKLFQANLLEDQSKTVLLPSDDATLQGALQLRIQFRTVSGVGSARLEVHILGCEEEYTTTEMTTTVTTVTTPTTTVTEETTTSRSTTSEISTTPGYCQEEMDGEEGLESEVTADGTLTIDDQTSYVTIPELPISQSAGSFPSVERKFRRRVRITALRTTLRSSSQAGEGTTTAVPAAGEQPIEITAVVLTKKPGDNSFSPLMDESTNQPKLITITLNGDQPASTPLPEDEDALDDVTEMRLEFRSVLGVDEITFEQHVLGCIKEYTTTEPTTRSTTVTTTRMTTTSPAPTTQGYCLETLNSESGLLSNVEPQGLSVLDESLGLLQLQDLPITEGAAESPSLDSTFNRRIIARAISLRLLPTSSTTPAGTGAEPTSRQLSFTVQVKKPGDQEYSPLREASSDQEKLFQANLLEDQSKTVLLPSDDATLQGALQLRIQFRTVSGVGSARLEVHILGCEEEYTTTEMTTTVTTVTTPTTTVAEETTTSRSTTSEISTTPGYCQEEMDGEEGLESEVTADGTLTIDDQTSYVTLPELPISQSAGSFPSVERKFRRRVRITTLRTTLRSSSQAGEGTTTAVPAAGEQPIEITAVVLTKKPGDNSFSPLMDESTNQPKLITITLNGDQPASTPLPEDEDALDDVTEMRLEFRSVLGVDEITFEQHVLGCIKEYTTTEPTTRSTTVTTTRMTTTSPAPTTQGYCLETLNSESGLLSNVEPQGLSVLDESLGLLQLQDLPITEGAAESPSLDSTFNRRIIARAISLRLLPTSSTTPAGTGAEPTSRELSFTVQVKKPGDQEYSPLREGSSDQEKIFQANLLEDKSKTVLLPSDDATLQGALQLRIQFRTVSGVGSARLEVHILGCEEEYTTTEMTTTVTTVTTPTTTVTEETTTSRSTTSEISTTPGYCQEEMDGEEGLESEVTADGTLTIDDQTSYVTIPELPISQSAGSFPSVERKFRRRVRITALRTTLRSSSQAGEGTTTAVPAAGEQPIEITAVVLTKKPGDNSFSPLMDESTNQPKLITITLNGDQPASTPLPEDEDALDDVTEMRLEFRSVLGVDEITFEQHVLGCIKEYTTTEPTTRSTTVTTTRMTTTSPAPTTQGYCLETLNSESGLLSNVEPQGLSVLDESLGLLQLQDLPITEGAAERPSLDSTFNRRIIARAISLRLLPTSSTTPAGTGAEPTSRQLSFTVQVKKPGDQEYSPLREASSDQEKIFQANLLEDQSKTVLLPSDDATLQGALQLRIQFRTVSGVGSARLEVHILGCEEEYTTTEMTTTVTTVTTPTTTVTEETTTSRSTTSEISTTPGYCQEEMDGEEGLESEVTADGTLTIDDQTSYVTIPELPISQSAGSFPSVERKFRGRVRITALRTTFRSSSQTGEGTTTAVPAAGEQLIEITAVVLTKKPGDNSFSPLMDESTNQPKLITITLNGDQPASTPLPEDEDALDDVTEMRLEFRSVLGVDEITFEQHVLGCIKEYTTTEPTTRSTTVTTTRMTTTSPAPTTQGYCLETLNSESGLLSNVEPQGLSVLDESLGLLQLQDLPITEGAAESPSLDSTFNRRIIARAISLRLLPTSSTTPAGTGAEPTSRQLSFTVQVKKPGDQEYSPLREGSSDQEKLFQANLLEDQSKTVLLPSDDATLQGALQLRIQFRTVSGVGSARLEVHILGCEEEYTTTEKTTTVTTVTTPTTTVTEETTTSWSTTSEISTTPGHPITEPTTRSTTVTTTRMTTTSPAPTTQGYCLETLNSESGLLSNVEPQGLSVLDESQGLLQLEDLPITEGAAESPSLDSTFNRRIIARAISLRLLPTSSTTPAGTGAEPTSRELSFTVQVKKQGDQEYSPLREGSSDQEKIFQANLLEDQSKTVLLPSDDATLQGALQLRIQFRTVSGVGSARLEVHVLGCEEEYSTTEMTTTVTTVTTPTTVTEETTTSRSTTSEISTTPGYCQEEMDGEEGLESEVTADGTLTIDDQTSYVTVPELPISQSAGSFPSVERKFRRRVRITALRTTLRSSSQAEEGTTTAVPAAGEQPIEITAVVLTKKPGDNSFSPLMDESTNQPKLITITLNGDQPASTPLPEDEDALDDVTEMRLEFRSVLGVDEITFEQHVLGCIKEYTTTEPTTRSTIVTTTRMTTTSPAPTTQGYCLETLNSESGLLSNVEPQGLSVLDESQGLLQLQDLPITEGAAESPSLDSTFNRRIIARAISLRLLPTSSITPAGTGEEPIPRGLSFTVQVKKPGDQEFSPLREASSDQEKIFQANLVEDQSMTVILPSEDETLQGALQLRIEFRTFTAVGSARLEVHILGCAEEYTTTTVTTSSTTLSTPSTTTEEVTTSAETTTAVTTTTEEITIVKKTTPAKSSTQATESTEKLTTTRTPKPTTTMIPSTAQPTVVTTTPEVTTTTPGECDDDFIQIDQLEVQRQTSSGEILQSGSSWEITSLPLATRPLSTEDADDLESLIVKFSSPVQFSSIVISNQEDDESITEFALKVKESPDSPSEFLMDGGNVQIFTASGTDKTRLPELPQLREIEIVPVKIDSSSDVNNLNLDLFGCAEIGMSRWRWWSNLSKDSFNTWSSVCVLNYSNNFNNTYNIANDYSTTNYHHATEYNIADNSKCSKWF*

>Agib-Sfp13

MANLPPQYILVLLLLTHFYPQTTKCQTTDSHFCPREEAVDVIVQEKYLVEEWQTLDISLQSYKDRLRAGDKIRLVRCDDNSPTCEVQVAESVERTRPRHQTRLKEIKDCCEGWSGDKCNIPVCAPPCQAGECVAPDQCECYPGYAGLTCEKAICKPECVNGVCISPDECQCYPGFSGTSCEKGAVVDKEHKCTLCCGGAFVSFDGFFYTFPTSGLITLASCDDCGIGAFAIKVHASYPCDEQQCHIFNIVVISYRIGDREFEVELLPDNGVRYEDQDVTELPLIVNDFGTVSKDGMHTVFKGFQGNDVTVRVDASGGIDLQVSDLFQGAMTGMCGNFNGDAEDDDVSEEEARGFGMVFDFKESSSTCCQGVDPPMAEAANDLCEEMMTGAEEGFRACPAGVNPAKYRMLCLFTMCHCLRAVGDAAPGPCFYEGRKAILCDVLTQYSRDCLAEGVLPEWRRDDLCPMQCENGQVYTDCGSPCPRTCENLDFQEECEQYCVEGCHCPTATFWDRTKCVPREECPCTRGSDLFPAGHTITSGCQLCTCLGGRWDCTTNECNATCSVSGGHHFRTFDGSNYLFPASSFCEYLLAELSDPQFSILIEFEDCTASLRSCLMVVSVVTPDRSIFELNGQSIKVTNQAGHTTEKLPFRTTFHDNSVLVARQVTSLFTRLTIAEHGIDILLGRDSQLYLTLNPRWQTKVRGLCGTYNNKQIDDFVAQSGLDAKAKINSFGNSWKIGRHCPDVEEDVTLRPCDLHSQRVPLADGICKKLREPPFDRCNKLVAVDKYEEQCREAVCGCHASDFQCQCLAFATYARACAAAGETFLWRSERTCPMVCPTGEIYRMCGSNCVLSCGELSSYQDCQEECVEGCQCPHGKLRDIGSGQCVFVEDCSCEVDGVVYESKQSWKSGCNECFCSAGTYTCTERDCTEYESCAAGMEWLECQECERNCQNAYLPCVQTVCTHGCGCPEGKVLHKGTCIQVDECSCDYNGKSYKVYEKVAIECHECMCNTDHRWICDDDTCPCDCEYTLVEDFCGESEGSFRVLIENIPCGEGGVTCTKAVKFMLYDTTIHLVRGSPYTVTRNPDISVQARFKVEEAGLYLIIKTPDGITLKWDYGTSVHVTLDPLLAGQVCGLCGDFNGDANDDFKSRNREIEALAHVFGHSWRSVQNCAVPKELLHTCETAPHRKPWAENVCGIIKKSVFASCQNLVDPEPYFHACVQDTCACDRGADCECMCTAIAAYAMACNENNVAVAWRSDGYCALQCENGRKYQACGKVCPDQCYPSNADEDYGCETHCVEGCHCPEGQVLFRDRCIERQLCPCFIDSGREEIKHGALVVHDCMQCMCNGGHLECSGTNCTEKAIMATKKPCGHKPPQTCTCAPGFTCCTDKAFCIEDSKFCDGEYNCNDLSDEIHCDCVYKGITYSSGDTWSGERACEVCKCEAGRTTCLKECSLKCDIVKEWPLLQLVVLVAQMLKQRHGRHGRHALVLEALMLKQPHGGHGRHGQLALNFQPLLLRKPQRKPLVQETTLNGDRPVTLILASPVTGIKELRLEILSIGDSNEGSLRVDFLGCKEEVSTTTPAATTTKVVTTTTQTSTSTTAGYCMEPMDGDQGLEGGRSKSPDSEEIRFILSVRDSTTQTFRDVLDSSGQPLVQETTLNGDRPVTLILASPVTGIKELRLEILSIGDSNEGSLRVDFLGCKEEVSTTTPAATTTKVVTTTTQTSTSTTAGYCMEPMDGDQGLEGGRSKSPDSEEIRFILSVRDSTTQTFRDVLDSSGQPLVQETTLNGDRPVTLILASPVTGIKELRLEILSIGDSNEGSLRVDFLGCKEEVSTTTPAATTTKVVTTTTQTSTSTTAGYCMEPMDGDQGLEGGRSKSPDSEEVPTTTPAATRGKL*

>Agib-trypsin Sfp (g20573.t1)

MKVLIFLACLSLACAYHFKGMPADRLIVGGSEVNPPHSRPWQVALFSSSSGGFNSQYCGGTLVHSKWVVSAAHCAGGSVYAGLGFHDLNESGNQIIKGSWIKHSSYNSGTLDNDIALIKLSSSASLNSNVKTIGIASANSDVSSGTSLLVSGWGSTSSGGAYPTKLREVVVKAVSRSSCNSDYGGSITNNMICAAASGKDSCQGDSGGPIVSNYGSVSSTTLSGIVSWGYGCADSRYPGVYTRVANYCSWIASKSSNAVRC*

**List of Agib-Sfp coding DNA sequences**

List of coding DNA sequences of A-gib Sfps, primers are underlined, ISH probes are indicated in blue. PCRs confirmed with Sanger sequencing indicated in **bold**.

>Agib-Sfp1 (g23502.t1)

ATGAAGGCGACAGGGTTTGTCGCGCTGTTGGTCGTGTGCTTCTTACGCGATGCCGTTTGCAGCGATGTCCCTTGCTCCTGTGCTGATGTCAAGGCGAGAGGTTCTTCAGACAGTGGTGACTACGACATCGACCCTGGCAATGGAGTCATATCAGTCTACTGCGACATGTCGGGACGCGATCCGATAACCATCGTCCACCACGATCACGAGTTTGAGAATCGTGAAGATCGCAGGGTGGACAACTGCGAAGAACCCGGCAGCTTCTCCGCTCGAATCGGCTACAAAGCCGCAATAGAACGAGTTATTGCCCTGGCAGACCTTTCCGACTACTGTGAGCAGTACATCAGTTACATTGCCCACGGTAGCGTGCTCCGGTGGAAACCGGAGAAACAGGCCTACGGCTGGTGGGAGGACAGATGGGGATTCAAAATGATGAACTGGGGCGGTGCTCCCTCAGGCACCGATGGATGCGGCTGTAGCGTCAGTCCTGGAGGCTGCAAAGAAGGCTGGCGGTGCAATGCGGATTGCAACATTCACGATGACATTGAGGACGCAGGCTTCTTGAGAGACAAGTCTCATTTGCCTGTGGCGACTCTGCGCTTTGGTGACACCGGTACACTGGATGACGACGAATATGGCTTCTACGAGCTGGGACCACTTAGATGTACAGGAGGGCCGGTTCAACGTGAAATAGAAATCCCTATCTTTGAGACCAACACTGAGTACCGTTACCGCTACACCCTTCCCGCCCTGGATGCTGGCGATTGCCGTGTGGAGTTTGAGGTCAATGCCAACAATGACGTATTCCTGGGATTCTCAGAAACTGAGGGCGAACAGAGCAACTTGATTGAACTGAATATGGGTGGATGGGGCAACAGCAAGACTGTGTTCCGTCAGTGTAAGCAGTGCACCCCACAAGCCTCTTGGCGTGAGAATGGTGTTGTCACCTGGGGTGAAAGAAGAGGATTCTGGGTGGACTGGAGTGATGGTTGTTTCCGCCTTGGCCGTTCTGGCAAAAGCCATTCCCTCTCCTGGTGTCCGCCAAGAGTCAAGAACTGGAAGTATGTGGCTTTCACAACCGGCTACGGCAGTAGTGGGCAGTTCAAATTCAACAGCTTCTACTCCAAAGTTCAATACACCTGTGAGCACGACACTGCCTTCATTAACTGCGGCAGTAACTATATCAACATCCTTGACGCCAACTATGGCCGCAGCCGTGGAGACATCTGCCCCGATGGACCCATCACCTCAACTGAGTGCATCTCCATCACGTCCCGTAGTATCATCGGTAAGCTTTGCCATGGGGAACATGATTGCCGCGTGGAGGTCAACAATGGTGTCTTCGGCGATACTTGCTCTGGAACCTACAAATACTTGAAGGTGAAATACCAGTGTGTGCCACAGCGGGAGGAGAAGTACTTCATCCCTGAGGCCTGCCTGGAGCATAAGTGCAACCCCCGGGGTGGAGAATGCATCCCTGTCAGCAGCTCTGAGTACCGATGCGCATGCAAGTCTGCCTTCCATGGCGAATTCTGTGAACACGAGTATGCCCTGTGCCGTGCTTGGGGAGATCCACATTACACTCAGTTCAACGGCCGCAACTTCAACTACCAGGGCAAGTGCAAGTACATCCTGGCCCAGCCCTGTGTGGAAGAAGCCGACAGGACCTTCAAGATCGTTGGCGTTAACGTGGCCCCTGACTGGAACAAGAAAGTCTCTTTCAACCGACAGCTGGAAGTCCAGATAGGCGGAGTGGAAATTTCCCTCCTGCAAAAGAAACAAGTTGTcatcaacaacaacatcaacaacGTGCCCTGCTCCGTAGGTGAAGATGTCAGTATTGACTTTGACGGCAAATATGTGGTGGTCAGCAGTGAAAAGTACGGCATGAAGGTCATGTGGGACGGATGCCAAGTCTACAAGATCTTTGTGGACCGCGACCTGTACGGCGAGAACATGTGTGGACTCTGTGGTGGCTTAAAAGTCACTGAAAAGGGCGTCTTCATCATGAGGAACGGAACAGAGACGTCCAAAATCAACCACTTTGGTGACTCCTGGACCGCCAACCCATTTGAATGCGCCAGTTGCGACGATTGTGTGGATCTGGACTACTGCAACACTGACGACGGACTCATGCAAAACGTCAAGGATGCTTGCGAGCCTATCCGAGACCCTAATGGTGTATTTGCTGTGGGTCACGAGCAGTTTGACCCTCAGGAGATGTACAGGACTTGCATCTATGACTTGTGCTCCAGGAAGTCCTTTAACGACGAGATCCGCTGCGACATGCTGACAGAGTACGCCAACCGCATCCTGGTGGAGAACAGGCTCCGCTACTTCCAAACGGGAAACGCAATCATCCATTGGAGAGCGCAACTCGCATGCCCAATTGAGTGTCCTACCGGCTCCATCTACACCATCTGTGCCAGTGCTTGCCAGCCTACCTGCTTCCAGCGTATGGCTCCTACAAGCTGTTCCTCCAACTGCGTCGAGGGCTGCGAAGCTGCTCCCTCCTACGTCATGGAGAACGGCGTTCCCATTCCTGAGTGGAAGTGCGGATGTCGCTACGGTGACCTCTACTACAATGTTGAGCAGCAGTGGCTCAACCACGATTGCACATTGTCCTGCATCTGCGAGGCTGGAGGTCAAACCAAATGCCACGAGGTGAAGTGTGCTGAGCATGCCATGTGTGGCTCCATGAACCAGGTCCATGGCTGTCACTGTGAGGCCAACTACATCGGTGAAGGCACCTCCAGATGTCTGCCGATCTGCCCCTCCAACATGGGCAACGAGATCAAGCTGCGAGCCTTTGTGGATGAGGGCCAGCATGCCATCATCGACTTCAGCCGGCCCATCGCCTGCGAGGGCTACATCCGGGGCTTCACCATCAAGCGTAACGCCGACTCCATGGAGCCCGTCACGCTCATCGTCTGGCGCCCTCACACAAACGAGGAGGGCAAGTTCCTCATTGTGGGCAGTGCTCGTCTGAACATCGCTGACGACAGCGTGGACCTGTGCCAGTGTGACAGCTCCAAGATCCCCGTCCGGGCTGGGGACTACATCGGTTTCATCTCCTCCGGCGGCACTGTGTACTACGATGATGAAAATGACCCTGAAGCAGGCGAAGTCTACGTGGCGGATTACTTTGACTCTACCGAGCCCATGACCGAGGTCCAGTTTGCTCCTCTAGGGAAGAGGACGTACTCCATCAATGTCGTTCTAGAATCATCTGAGGGCAAACACGTGGAAGCATTCATGTTCAACAGTTACCTTGGCGTGCAGTCCCGCACTATCCCAGACTCTGCCATGACCGCCTCCTCCTCCCACGGAAAATACGAGGCTCACCAAGGCCGTCTGGACAACAGCAAATACGGCGCTTGCTCCTGGACGGCCGGCTCTGCAGACAAAGACCAGTGGTTGCAGGTGGACCTTGGCCAGGAGACGCTGGTCATTGGTGTGGTCTCCCAGGGGCATTGTGGGATTGCCGACAAGGACGGATCCCCCATGGGCTGCGTCAAGCAGTTCCACGTGCAGTACAGCAGTGACGGCCAGACATTTGAGTACGTAACTGACGACCACGGCGAAGCTGATATCTTTGAGAGCAGATGCAGATGCCAGAAGCACATCAAGAACTTTTTCAGAAGTGCCTTGATGACCCGATTCATTCGAGTTGAGCCCGTGCTCTGGAAAAACGCAATCAGCATGCGAGTGGATTTCATTGGACGAGACATTGAAGTGGACGAACCTGACGTGGCCGGAACTGACGCACCCGTGGACGAAGCAGAAGTGGACATGGCTGTGGTGCTCAAGGGCAGGCCATTCAAGCGCTGTGGTTTCCTGAAGGGAATCAAATACCGACCATTCAATGCCGAGTCCTTCACCGTCGCCGTTGTGCGCCAAATTAAAGACAGTGAAGACACCTTTGAGCTCATTGGAAGCACCTATGTCACTACCTCCGGCAAAGACAGATTGCAACGCTTCGAGGTCGCTGAAGAGAATGACCGCATCCCGGTCAAGAAGGGGGATTACCTGTGCCTGATCTTCCCGAAGGCTGTCATAGGCTACTCCGCTAGTGATGACCCGAAGGACGTTGTCTTGACCGCCTCCCTCGGGTTTGATGAGTACAAGGCCATTACCATGAACGGCCAAATCAATTTCCCCAACAAGGACGGGAGGAAATACAGTGGGGTCAGACCCATCTTCCAAGTTGCCACGACGAAAACCATTCCACCAGTCATGTCGACGGGCAGTCTGGGTGTGGAGGAAGGTCAGGTCAAAGATGAGCAGATCACGGCCTCCAGCTTCTGTGACGCCCACAGCAAGGCAGAGCGTGCCCGTCTGGGCCTGAAGGACCAGCAGGGTATGACTGGCGGATGGTGCGGCAGGGAGCTGGACCAGAGCGCTTTCATCCAGGTTGACTTCAAGAAAGTTCGTCGCTGTGGTGGGGTGGTGACTCAGGGCCTTAGCAGTGCCACCAGATTCTGGTTTGTGCGGCTTTACATCGTCCAGTGCAGCTTAGACCTGACAGCCTGGGAGGATATTTTAGACGACGATGGCAATATCATGATGTTCGATGGAAACTCCGACCAGGATACTGAAAAACCCAACTTCTTTGCTGAAGTTAAGAATTGTCGTGCCCTCCGCATCAGACCTATGGTATGGAGCGGCCCCTACCCAGCCTTGAGATTCGACATTTTGGGCTTGCCAGATATTGTCAGCACTGAACCCAAAGTTGGGTTTTCCTGCAGACATCGAGATTACCGTGGCTCCGGCGGCTTCACCTTTGTCATGCCCGCTAAGAAGTTCGACTCGGACGGCTTTGTGACTGGTGTGCGCTTCATGGCAGTCAGGCGTGGCTCCTTCAGGGTCATCATCTTCCGACCGGTGGACGAGGCAACCATGACCTACAAGGTGGTCGGAAAGAGGCACATCAAAGTCAAGAAGGCTGATGTGGAGGTTGTGGTCAACTTCAAGAGGGGCAAAAAGAACAGGAAACGCAAGAAGTGGATCTCGGTGAAGGAAGGAGACATGCTGGGCCTGTCCTTCACTCGCTCTGTCCTGTACAAGTCCAAGGAAGGCGCAGACCTCACTGACGTTGTCTTCTCCAGGAACATTGACATCCCCAAGTTCCGCAAGCTGAGATGTGGCCGCGTCATCACCTTCAATGGAGTGGCACCTCGCAGCTACTCCGTGGTCGCCCTCTTCAAAGCCAAGGATCCCAGTGAATGTGCCCCACCAGTCGATGCTTACAAATCCCTGGGTGTGGAGAACGGCCAGTTCCCCGTGGATTCCATCAGCGTGTCATCCTTCCACGAAACCGACAACCCCGACCAGGACTTCGGGCCCAGCTCCTCTCGGCTCAACTACGTTGGCATCCACGATGGGGCCTGGGCGTCGGCGGCCAGCGACACCGAGCCCTGGATCCAGGTGGACACCGGTGCCCAGTCAGTCTTCACCGGCCTGATCACCCAGGGACGCCACAGCCTGATCAACTGGTGGACCACCAAGTACCGTGTGGCTTACTCCGACGATGGGGACGACTGGAAGGACGTTAAGGATTGCAATGGCCGAACGGAGTTTGATGCCAACAAGGACAGTGACACTCCAGTGACGAGGTTCTTTGGCAGCGCCGTCAGCGGTCGCTACCTGCGCATCATCATTGTGGCAGCCATGGACCGACCGGCCCTGCGTTTTGAAGTCCTTGGTGAATTCGAGACCGCTGCCACCGAGTACGGCCCCTCATGCATCATGAGGGAATTCATTGACAGCAAGAACTACATCCTGCTAGCGGCTGGATCCTCGTTCGAGAGTGATGGCTACGTCACAGAGTGGAGATATTTCCCGAAGAGCGACAAGCCTTTCAAGGCTGGGGTGTGGCGGCCAGACCCCGATGACCCGACCCGATACAAGCACATCGGAAGCAGTGACATCCCAGGCCAGACCCCCAACGAATTGGCCACCTACAGATTGGACAGCATGGCTCGCATTCCATTCAGGAAAGGCGATGTTTATGGATGGTCCTTCGGCGAACCCGTCATCTGTTACGACGAGGGAGAAGAGAGCGTAGAGCTCCTGTACTCAGGCAATGGCGGCAATCTGGAGCCTACCCCAGTCGGCCAATACAGGAAGTTTGTATCCAGCGGAAAGCAGGCTTACTCCATTGGTGCCTCAGTCCAAATTGTAAGCACGGGGACTGTACCAGCACTTGCTTGCATGAACGGCCTGGGCATGGATGACGACACTATTCCGGACAAGAGCATCGAGACATCCTCTGTCCTGGGGCTAGCTTACGGCAACAGCCAGTCCAGGCTGAACGCTGAGGCTACGGCTACCCTGAAGGGCTGCTGGGCACCAGCACAGAACAAGAAGGACGAGTATGTACAGGTTGACCTGGGCAAGCCCACTGTTGTGACAGGGGTGAGCATTCAAGGCTGCAACGGCGAGGAGAGATGGGTGACCAAGTTCAAGGTGGAACTCAGCATGGACAAGAAGAACTGGAAGGAGGCTAGAAATAAGCAAGGCGGCACGATCTTCTACGGCAACAGTGACTCCGATTCAGTGGTCCAGGTCTTCTTTAAGAAAGAAGTGAAGGCCCGACTGTTCAGGATTTCTGTGGAGGAATGGAAGAAGGACATCGGTCTTCGATTTGACATCCTGGGCTGTCCCGCTGCATGTGAGACTGAGTGGGGTTGCAAGCCGCTGGTCAGGAGATGGCAGTACTCCATGTGTGACAAGACGTTTGTGGTCAACACTCAGCACCCACTGACTTGCAACAGCTACATCAAAGGCTGGAGGATGATCCCCAGGAACAAGGCACCCGTCACTTTCTATGTCCTGAAGCCCATCAACTTGAAGCGGGGCAAATTCAAGGTTGTTGGGAAGACCTTCGTGCCACGGCGCAAGAAACTGCAGAAGGGAGAGGTGTACGAGATTTTGCTGGAGCCCAAGGACTGGATCGAGGCACGCTCTGGTCACATGATCGGCTTCACTTCCCGCTACCGCAGCCCTATCCACAGAGACAAGAAGGCCCACGACAGATCCAAACACATGATGACTCGCAACAAGAAGATCAAAGGTTACAAGAGGTTGGACATTGGTGATAAGTTCCACATGAGGAATCACCGCCACAGAAAGGCAGCGTTCTCCTTCACTGCCATCCTGACCCAAGAAGGAATGGGTGGAGGCAAGGAGGTACCGCCAGTGGCCTGTGTGGGAGGTATAGGCATGGAGAACGGAGCCATCCCAGATGAATCTATCCTGGTCACGAGTTCCATGGATCCACTGAATAACGGAGGCGCAGCTGCTCGCTTGTTGGGCGACAATGCCTGGATAGCCTCACCAGATGACCCCACACCCTACATCCAGATTAACTTTGGCTACAGAGCGAAAGTGACCGGCATTTCCACCCAGGGCGATCCGACCATCGACAGTTGGGTGACCAGCTACTCCGTGGAGTACTCCGACTCCTGCCACTACCTGACCAAAGAACCCCAGAACTTCCAGTGGGTCAAGTTCACCAACACACTCAAAGATATCTTCGCTGGTAACTCTGATCAGAACACCGTTGAGACTCGCTTCTTCAAGGAAGTGATTGAAGCCCAAGTAGTCCGCGTCTGGCCCCTGGACTTCCACAACCATGCTGCCATGAGATTGGACTTCCTAGGTTGTTCAGATGAGGATCCCTGCAGCCCCAACCCGTGCAAGAACGGCGCCATCTGTCGCAAGACTCAGGCCAGCTTTGGCTACACCTGCATCTGTCCAGTGGAATGGGGCGGCAAGAACTGTGACATCAAGGCTCACAAGTGCTGTGCCTACGGTGACCCCCATTACTGCAACTTTGAAGGCAAGAAGTTCAACTTCCAGGGTCACTGCGAGTATATCCTGGCCCGGACCCTGACCACTACCACCCTGGAGCACTTCACTATCACCGCTGATAATGTCAAGAGCCAGCGCCGTCCCTCCGTGTCCACCACTAAAGAAGTCTACGTGAAAATCGGCGACAAGAAATTTGACTTCAAGAGGAATCGGGCCGTGTACGTGAACGGCGAGCTTATCACTTGCCCCTACGAGATTGATGGAGTTACAGTTAGCGATGGTGGCAACAAGCGTGTGATCCTGCGAACCGATTTTGGTCTGACTGTCAGCTGGGATGGTAGAAGCAAGGTGGACATTTTTCTGACTGAGGACTACATGAATCAGGTGGAAGGATTGTGTGGTAACTACAATGGCGATAATTCCGACGATTTCATCCTGAGATCTACAGGAGAACTGACCACTGACCGCGAGCAGTTTGGAGAGAGCTGGGGCGCCGACCCGACCTGCGAGAAATGTACAGACTGTCAGGAGACTGATATCTGTCGCTTGACCGAACGTCTTGAAGAAGCACAGGATGCTTGCAAATTGCTGAATAACCGCAACGGTCCATTCACCATGTGCATCGCTGCCATCAAACCCGTGGATTACTTTGAGAACTGCCTGTACGATTTCTGCGCCCTATACCCGACTCAGGACAACCTGTGTGAAGACATCCAGAAGTATGCCGATGAGTGCATCGACGCCGGGCTACAGGTCGGCAACTGGAGAAGACGCGGTTTCTGCTATGTGGAATGCCCAGTGAACATGGTCTTCTCCCAGATTGGGACCATGTGCCCGGATACCTGTGGTGACATGGACGCATCCAAGGACTGCACAGGACAGGCTGGCCCCATGTGCGTCTGCATGCCAGGCTTGTACTTGGAAGACGGAAATCGGTGTGTGGAAGACGCACAGTGCGGCTGTACCTACCAAGGCGTCTACCACAAGAACGGCCTGCGGTTCATGGCCGACGATTGCAGCGAGATTTGCACTTGTAATGCTGACCACGAAGCCGAGTGTGAAGAGGTCACCTGCAACGCTCACGCAACATGCCAGGTTGAGGATGGGGTCCGTGGCTGCTACTGCAATGATGGATGGTCGGGAGACGGCATGGAGACATGCGAGGAAATCCTGGAGCCAGCGGATGTGGTAGTGTGCGAGGACGACACGCTGACCATTGACTGTTCAGCATCCGGCGAGCTCATCGACATCCTGACAGCCATTTACAGCACAGAGCCACGAGCTGAATGCCCCAACACGGCCGACAACGCTGAATCCGAGGAGTTCCGGTACGCCAAGGCCATCATCCGCGACCGCTGCCACAAGCACGCCAGCTGCACTGTCCCAGTCAGTTCCCTGGTCTTCGGGAATTTCGGCGAGAATGCCCCCAAATCACTCTACGTCCGCTACCAGTGCCGTGAGGTGGTACCGGATTCTATCTGCCACCCCGACGTCGAGCTGATTTCCTGCCAGGGCAGCGACTTGGAGATCCAGTGTGGCGACGAGAAGATTGACATCATCAGCGCCAACTTTGGCCGCCGACAAGGGGATCATATGTGCTCGACCGACGACAACGAGGTTCTGACACAAGACTGCTTCGCACCCTCAGCCTTGAACAAGATGGTGGAAGCCTGCCATCTCAGCCCCATGTGCACAATTAACACCATCCCGGAGACCTTTGGCAGCGACCCTTGCCCAAACACCAACAAGTATCTCAGGATTCACTACCAATGTAACCCGAGTCCCGACCCCAGAGAGTTGGAAGAAGACAAATGTGAACCCAACCCCTGTGTGAACGGAGTCTGTGAAGCCATCAGCATCGAACCCAAGTACAACTGCAAGTGCAACCCAGGTTTCACTGGCCAGCACTGCGACATTGGCACGGCCACATGCAAAGCCCACGGCGATCCCCACTACATCACCTTTGACGGCAAAATTTACAGCTACATGGGCCACTGCAAGTACACCCTGGTCAAGAACGCCGATGGTGACGTGCCCGACTTTGAAGTTGTGGTCTACAATCAGGCGGCGAGGCGCAACCCAGCCATGTCCTCCACTGTGCATGTCCAGTTCAACTACGTTGGCAAAGAGGTGCACATGTATTACCTGGGAAAAACATTCATCAACGGCATCCAGATAGAGGGCATGGACACCCCAGAAATGAAAATCAGTGTGAACTATCCCGACGTGGTAATTGAGACCCAAATTGGTGTCACCCTTCGCTGGGACGGTAAATACATGATAGAAGTGGACGTGACCGGCGAGTACTACGGACACACTGAGGGCTTGTGTGGCACGTACAACGGCAACCCTGAAGATGACTTCCTTACACCCTTCGGAGAAACGTTGGATCCGCTGGTTGACGGCAATATCGATGTCTTTGGAGATTCCTGGCTGATTCCCGACCCGGCCATCACCAGTTGCGATAAGTGTGAGGACTGTGATCGCCTTGAGCCGTGCAGTGATGCTGCAGTCAAGGATGCTGCCCAGGAGATCTGTAACAACATTCTCAGCGATTCTGGTCCTTTCCAATCCTGCCACGACACCGTGCCTCCTATCGAATATTTCAAGAACTGCGTGGTCGATCGCTGCACCATGCCGGACGGCCTGGCTCACTGTGATGACTACCAGGCCTACGCTGAAGCTTGCAGGGATGCGGGTATCATCATCAACTGGAGACGACAGGACTTCTGCTTCATCGACTGTTTGGCCAAGAACATGGTGTACAGCCCAGTGAGTCCAGCTTGTCCCGCAACCTGTGCCAACCCGATGGCCAGCTCTACCTGCAACCGGGCCGATCGGGAGGATTGCGTCTGCCCCTCGGGCATGATCAAGGAAGGCGAGACCTGTATCGATGAGGAGAAATGTGGATGTGTTGACCAGGAAACCGGCTTCTACTACAGGCAAGGGGAAACTTTCATGACTCCAGACTGCTCCAGAGTCTGTTCCTGCGCAGCTGCCCATGATCTCCAATGTGTGCAGTTCCAGTGTCCCCCTCACGAAGTCTGCGGCACCAGAGATGCTTCCCCGGCGTGCATATGCGATGAAGGCTACTTCCGTGACACAGATTCCAACACCTGCGAGGCTATACCCGTTCCACAAGTCTTGCTCCGGTCCCAGAAAGAATTGGAGTGCACTACCATCACCTGCGGGAAGGGCTTCATCGATGTCCTCGATGCCAACTTTGGTCCTCGTGTTGACGAGGTCTGCCTAGAGGGTGATGCCCCTACTGACTGCAATGCTGCTGAATCCAGAGCTATTATGCGCAACCTGTGCCAGGGCCGAGGCACATGCCAACTGGACCCCACTACCGTGCAAGCCTTCGGCGAGCCCTGCTTCGGCGCCCTCAACTACATCTTTGTAAACTTCGCCTGCACCCACAAGCCCATTGCGCACGGCGAGCCACGTTCGCTGCCCTTCGAGCTCCGTGTCTGCCAGGACAGCTCCTTGTATCTGGCATGCAGGGAAGAGGAAGCCATATCCATCAAGAGCGTCTTCTTTGGCCGCCGCGCCAACGACGGCTACTGCCTGGATGATGGCTCAGCAGCCCCAGCTGAAGAGTACTCTGACGATACCGCCATGAACAGAGCTCTGGAGCTTTGCGCAGCCCAGTCATCCTCCTGCATTCTCCGAGGAAACGACTTCGGCGACCCTTGCAAGACAACCAAGGAATACTTGGAAGTGAGCTACAGCTGCGTCCCAAAAGTTGACGGAGAATAA

>Agib-Sfp2 (g17182.t1)

ATGGCCCGTATGAAACCCAGCGGTTGGTTGGCGCTGCTGGCCATGCTGGTTGCCGTTACCCGGACTGCGGCATCCGTCAACATGCAAACCAAGTACGCTTGCGAAGGTGAGATTCTCCGTCTTGACTGCGGAGACGAGTACATCAAGATGTGGAGCGCCCTTTACGGTCGCGCCAATCCAACCATCTGTCAGGATGACGTGATGGCACCCCTCTCTCACGCCTGCCGGGCCGACAAGTCTAACTTCGAGACCCTACGTCACTGTGACGGCAACCACACCTGCGAGATACAGGCGGAGAATTCCGTCTTCGGAGATGTGTGCGGCAGTATCAAGAAGTATCTCCAAGTCGAGTTCTACTGCAGGACTGAGAAATCATCGGAATGTAACCCAAGAGTTGCACCTGAGTACAAAACCAAGTATGCCTGTGACAACACGGACTTGGTTCTGGAATGTCCCAACCCCGGAGAAGTCATCAAAATCCTTGATGCTAACTACGGCCGACAAGGCTCCAATGTCAACTGCACGTATAGGCCCGGCATCGACGACGTTTTCTGTGACGACGGCACCGGGGAGTCCTTTGAGCATGTGTGTTTGGAATGCCGTGGAAAAACCGAGTGTACCGTTCCCGTCAGCCCGCAAGAATTCAAGGATCGCTGTGTGAATACCAACAAGTACCTGTCCGTGCAGTATGTGTGCATCTCAACagaagaagaagaagaagaagaggaagAGGAAGATGAAAGAGACACTCCAATGGGGAGTGAAATAGGAACCACCCAACGGCCAGAGAGACCCCGACCTCGCCCTGAACGAGGGACTACCCCGGCACCGAAAGGCCCAACATTTATATTCCTTCCCAAGCCAGGACAAGCTGCTTCTGGAAGCATTGGATCTGCTTCTGGACCCTCTAGCAGTAAAACATTCACCTGGAATGGAGGATTCGCAGCCCCCCAGCCAGGGTCTGGCAATGCCGGTGGAAGTATAGGAACGGATACAGAGGAAGAAACTCCAAAATTCTTCACCTTCCCCAAACCTGGCCAAGGGAAAAATGTAATCCAGGGCAGCATCGGTGAATCCCAAGCTGATGGTTCTGAGGGAAGCTTCACTTGGGGAGGAGAGCCATTTAAAGGATTCACGTCCCTCTTTGCACCTGTTGGAGCTGCTCCTGGTTCGACTGAGATGGTCATGAAGATCATTGTGAAGACGGACTCCAATGGACAGAAGTACTTCACCTGGCAGTCACAGCCAACAGGAGCAACGCCGGGTGATAATGAATACCTGATGAAGATTGACCTGACCAAGCTGTCACAGTACACACAGCAGTTCACCTTTGCTCAGCTGATCAAAGAGTTCAACAGGGGCATCACGTTCTACAACATGTACAACAAACCATCTGATGTCAGTTCACCCTTCCAGTTCAGCATCGGCAATGGCCTCACAGCCTTCTTCCCATCGGTATTTCAACTGATAACTGAAGTCGATGCCACAACAGGAAAGACAATCACAGctccatcctcctcctcctcctcctTCCAAGTTGTTCTTGATGGAGGCAACAGGCAAATCATCGAGTACCTCATGTCATTCACCAACATGAACCAAGAGTTACGTTCTGAGCTGCTTGATCACAATCTGAGGATACCATTGAGGTACTACGATGACAAGACCAAAAAGATTGAGGACATCAAAATCCCTTTCTTCATTAACTACAATGGCCTGAAGGAATTACTCTCAACTATATTCAACGCAATGCCAAAACCGACAAGCCAGTTTGGACTGAAGTTCCAGGTTGTTGGGGAGGATGGCCGGAGTGAGATGGTCACCTTACCGTTCACCATCATCGAGTACCAAGGAAAGAAGATGCTGTTCTTGACTCTGTCGACCTGTGCTGCCTATAAGTTGTATGGGTTTGTTGATGACAAGGAATATCTCATTGACCCTGATGGTATCAACAAAGGAGAGCAGCCGTTTGTTGTCAACTGTAACATGGAAAAGGGCGAGACAATCATCGACCACAATCGTGAGGAGTCAACGGTGGCCTCCTACCCTGCCGGCCAGAGCAGACTGAACATTGACGTCACATACAAGGGAGCCTCAGCCGCGCAGCTTGCTGCCCTAAAAACCGTCTCAGAAACCTGCGAGCAGGAGCTGTCACATGAATGCGTCAAGACATCAGCCCACTTTGTGGGCGGAGACGCCAAGATCTGGTGGCAGAGCTTTGACGGGAAGAAGAGGGAGAACTGGGGCGGTGTGGAAACGGATGTCAAGAAGTGTCACTGTGGAACCACTGACACATGCGTGATCAAGGGAAGCCTTTGCAATTGTGACAATGCAGAAGGAACAAGTGACTGGGGTGCCGTGACTGATAAAGACACCCTTCCTGTCAGCAGGGTCGTCTTTGAGAAACCTGCTGCTGCACAGGGTCAAGACAAACTCAAAGTTGGTGCTCTGAAATGCAGCGGAGATCAAAGTTCCAATACCTTGAAGTTTTTCATCACGTTGATGCAGATGCTTGCTCGTGGCACTGGAGGTAAAGTTCTGAGAACATGTGATGAATACAAGAATGTGGGTTATGAGCTTGATGGCGTCTACCTGATTGATCCGGATGGCAAAGGGGGCGAGACACCTTTCACTGTTGTCTGCAACATGGAGAAACAGGAACATGGTGTAACCATTGTCCATCATCAGGTCAGCAACCAGCGCACGATTGTCAGCAACTTTAAGGAACCAGGCAGTTACAGTAAGGACATCATGTATGGAGCCACCTTGAGACAAATCGAGAATCTAAAGCAAGTGTCTGGAGTCTGTGAGCAGTCCGTCACCTATGAGTGTCAGGGATCTGCATTCCGCGTTGGTGGTGTCCAGTATCACTGGTGGATGTCGTTTGATAACGAGAAGATAAATCCAACATGTCTGGAAAACTCCAACTGCAATTGTGACAAGAATGACAACGTCTTACGCAAAGATGTTGACGTCTTGAAAGACAAGGACAAACTGCCCGTCATGCAGCTGCGTTTTGGTGACACAGGAAGCAACAATGAGTTTGGCTACTATACACTCGGCCCTCTCAGATGCTGGGATAATTCTGGGAAAGATGTGGCTACCCGTGCGGACCTCAGCTCTTGTGATGCCATCAAGAAGGCTGATCCAGCAGCTCGGAGTGGAAACTATTACATAAAGGTGAACAACATCTTGGAGAGGTTTCTCGTTTACTGTGACATGTCTGGATCCGACGGAATCACCCTTGTGTACCCTGATAGTGTAAGAACGCTAGAAATTGATGGCTTCTACGAAGAGCCCGGTACCTGGGCCCGTTCCATCCGCTATGGACCATCCGATAGACAGCTCCAAGCTTTGACGACACTCTCAGCTTCATGTAAGCAGTTCATCAGCCATGGTTGCCATGGTTCCCTGCACCATGACGATGAGACGGGCAAGATGTACACTTGGTGGCAGTCCAGGACAGGAGCAAAGATGACGTACTGGGGGGATACCAAGGAAGGATGCCAGTGCTTTGCTGATAAATCCTGCCAGGGAGCCAACAAGAAGTGCAACTGTGATGTCAACTCTCAGAGTTTGACTTCTGATGAGGGGTTCTTGACTGACAAGTCTGTGCTGCCAGTGTCTGGCATCCGGTCAGGAGACGTCAGCGACAACAACGGCTGGGAGTATGGAACAGCCAGGCTGGGTCCCTTGATGTGCCAAGGAGCGCCTGGTGGCCGTGAACTGGATTCAGAACCAGATTGTGAGGCCATCATAACAGAGGCCGGAGGACAGTTTCGGGAAATGGCCGAAGAACAGGCATTTGCTGACTTTGATTTCAGCGTGAAAACTGCAGGGGTTGCCATTCTCAAACTGGCTGTGTACAGCGGGCCTGACAGCGACTACTACCAAATCGAAATTGAGCCGGGAAGCAATGTCAACTTCTACCATTGCAACCACAATGCCAGAGGGGAAGATTGCAAGGACAAACAGACACAGTCATTTACATCGGCTCCACCGAGCACCGCCGGGGAATCCAAGGAGCGAAAGTTCATCCTCAAGTTTGCAGTTTCCACACTTGAGTTGACTGAAGGAGGGGAAACTTTGACATTCCAAGACAAAAGACAGCCCATGGCTGTCAAGTTTTTCGCTTACAAGACAGAGGGCGATGATGGGCACTGGTTGTTTGACAGCGTCTGTACAGGAGCTGTTCAAGTTATCTGTGTTGGAATGGGCAAGTTGAGTTGCACTCCGCCGTTGAAGCCTTACATTGTCAAAGCCTTGTATGGTCGGACGGAAAAGGACGTCTGCAAGATAGAGAATGATCCCACAGATTATCCCGACTGCCAGATCGACGTGACACAGAATTTACGGAAGAAGCACTTGCAGAACTTCTGCATCAATCAGGGCAGTTCTTGCTTGTTCCATGCCTCGGACAATTCATACCTCGCTGCTCTGCTCCAGGAAGGGTGCAGGCCCAAGCAGGGATACCTTCACCTTGTGTACTCTTGTCGGAAGGAGTTACCAGAAGAGAGGAATCTGGGACCGTGCAGCTCCAACCCCTGCCAACATGGCGGCACTTGCACAGAGTCAGAAGATGAAGCGTCTTATTCTTGCTTGTGCCACCCAAAGTTTTCTGGAGATAACTGTGAGacagAAATGGTCACCTGCTCTGCCCTCGGCGATCCCCACTACAAGAATTTTGCAGGACACAGGTTTGACTTCCAAGGCAACTGCATGTATGTCATTGCGCGGGACTGCAACAAGGAATTTGAAGTCCTTGTGGTGAATCAGTCTCCGCAGTTTAACCCTGCAGTGTCCAGTACTGCAGAAGTCATTGTACTAATCAACAACATAAAAATCCATCTGAAGAGGGACAATGAAATTCTCGTCGATAACGAGAGGATTGACTTGCTTCCATTGGTAGAAGACAATTTCAGCATCAAGGATCGACTGGCCCATGTGGAGGTGCATGTTCCAGAGTATAGCTTGACAGTGACATGGAACCGCAACGACATTGCCAAAGTTATCCTTCCCAAGAACGATGGTTCCAGGGACATCTGCGGACTTTGTGGACACACCCGGGCATTTCAACCCATCGGTAGCTACAAGATGAGTACAGGAACGATTGTGACAGACCCAGTCATCTTCGGCAATAGCTGGCAAGTGGACACTGAATCCTGTGTGGCCAACACAGATCCCCGTAATGCCAATCAGCTTAGTCAGACTATTAGTAGTGGCAAGCTTGAGATTGCTCAAAGATACTGCAAGGCCATCTCGACTGCTGAGGTCACACAATGCCCAAATACGGCAGCTACTGCTGATGCAGTCAAGCAGGCCTGTGAGTTTGATCATGCAAGTGGCCTCGCAGAAAAGGCCTGTAATATCATCAAGGATTTTCAAGAGGACTGCGTGGAAGAAGGAGGAAGCGTACCGCAAGGAATCATCCAGTGTGGTGCTGCATGTGCAAGCCATCTGAGTCCAGTTGAGTGTGTCACCCCATGTGGCACCTGTATGGCGTTCCGTCTTTTAATTGGCAACTGTAACGAGCCGTGCATCGCGGGATGTTCCTGCGCAGACGGGAAGTACGATGACGGCGATGCTTGTGTGGAGGAAGACAAGTGCGGATGCGCACATGAAGGCAGATACTACAAGCTGGGATCAACTTTCCTGGATGACACCTGCACCGAAGAATGCACCTGTCTACCAGACAATGTTGTAGAATGTGGGCCACCCTCAAACAAGCTGTGTCCAGTGCATCAGACTGAGATGCATACCATGTGTATGCTCAACGACGGTGTCTATGAGTGTGTGTGCATTAATGGGTACGAACCAAACGCTGATAAGACAGCCTGTCAAGCAATGCAGTTGAATGATATGGTGTTTCCATCAGGTCGTCGTCGACGCAGGAGAGACATCAGTGAGGATGAATGCAATGTGGATTTGGGCATGGCCTCTGGCCGCATTGCTGACAACGAGATCTCCTCCTCCTCAAGCAAGAATAGGAAGAGTCTAGCCTACCATGCGCGGCCAAATCTGGCCGGATGGACGGCAAAGCGGAGAGACACTGAGCAGTGGCTCATGGTGGACATCATAATCCCCACAGAGATTACTGGTGTGAGGACCCTTGGTGATCGTCACAGAATCGGGACGAGGTACAAGCAGGCATGGGTAGGTGTCTATAAAGTCGAGGTAAAGCTGGACAGCACGGATCCATGGATTGCAGTGACAGATTCCAGCCGCCGCGAACAGTTTTATGGAAATACTGATGCAAACACTCCAGTCACTAACATGTTTTCTGAGCCGGTACGTGCACGCTTCATACGCATCAGGCCTGTGTCATTCTATGGTGAAATCAGCATGCGGCTGGAGGTGATAGGCTGCAAACAACAATGTGATGCAGAAATTGGCTCCTTCCCTGTCATCCGCCACATCTCCTCTGACAACTGGTTTGTCGTCAACACTGGTGAACCAATCACCTGCGCAGGTCACGTCACGGCTTGGAAAGTAATCCATGCCAGAGAAGAACCTCTTGAGGCTTGGGTCCTTAGACCTTTGAAACACATCCCGGACGGATTCATGCTTATCGGGAACACCCACATACCCTCTGGTCCCGTCGACAAAGAAGTGGAGTACGAACTGCTGGGTGATCAGCGCATATCTGTGCGCTCTGGGGACGTTGTCGGGTTCTTGTACGAGCGGAATCCTCTCTACTCCAGCGAGGAGGGGGAAGAGACGACAGATTACAAGTGGCTTCATATCCGTGACATCAGCAACTATGAAACCATGAAGCCAGGGTCCTCTCTCCGATTCTCTGCTGGAGATGGCAAACGTGCTTTCTCAGCAGTTGCTGTTCTTCAACAATCTAATGGAGTACCAGTTCCCCCAGTCCTGTGTGCTGGTGAAATGGGACTGAGCATGGACAAGATGTTGATACCAGACGAAGCGTTTACTGCAAGTAGCCATGTGAAGGGTCACAAGCCTATACGTGCCCGTCTGAACACACTCTACAGTCACAGGGGGATGAAGAGTGGATGGACTCCAAGACGGAGGGACAGGAAGCCTTACTTACAGGTTGATCTTGGGACTCAGCAGCATCTGTCAGGCATCATCACCCAGGGCAGGCATTCCAAGGCAGACTTGGAGACCTTTAAGAAGGGCAATCGACGACAGAGGAGAAGAATGCGACGACGAAAGAGACGGGCCCGAAGAAGACATGCCTGGGTGACTGCTTACTTTGTGAAATACAGCTTGGATTGTGAGCACTGGGAGTACATCAAGTCACCTGATGGTCTACGCAAGCGATTTGAGGGGAATGTGAACCCAAGCAGTCCCAAGACAAACTACCTGGATGTACCTGTCACAGCAAAATGCATCCGCATTTATCCAAAGAAACAGCGGGGAGCAAAGATTGGATTGAGATTGGAGCTTCTTGGGTGTTCAGCTGATCCATGCACCAGCAACCCTTGTGAACAAGGAGGGACTTGTAAGCAGGCATCGGGCCTGAATCCTGATGGCTACGTCTGCCAGTGTCCTGAAGGATGGACAGGACCCAGATGTGACATGGTTGAGGGGATGTGCCGCAGTGCAGGGGACTCCCACTACCACACCTTTGATGGACGGCATTACTACTTCCCTGGAGAGTGTACTTACACTCTAGCTAAAGATTGCAGGAATAGCGATGAACCAACGTTTGACATCCTCACTAACAATGATGCAGGTGGTCGTGAGATCTACATCTACACTAATAATATGATGTTTGAATTCAAGCAGGAAGGTGTTGTACATGTCGATGGAGAAGCCTGCAAGTTACCAGTCAAACGGAGTGGCGTTTCCGTCGTCCATAATGCCTACACAGGAGTGTTGTTACAAACAACTTACGGCCTGACTGTAGAGTGGGATGGTCACCATCGCGTCGTCGTGAATCTGCCAGCGACTTATGCAGGTGGAGTTTGTGGGCTGTGTGGCGACTTCAACGGTAACGAAGATGATGACATTCCGCAGGATGTCTCTGAGATGCAGTTTGGAGAAACGTTTGCCCCGGAGCCGGAGAACTGCGCAGTCTGTGAGAAGTGTATGCTTGACAAACCATACGACCGCAACCCTAGCAAGCAGATTGAAGCTCAGGAAGCATGCCGTCCCATCAAAGATCCTCTCGGTCCCTTTGCACGCTGCCATGGTGTAGTCAGCCCGGAGGAGACCTACGACGACTGTCTTCAAGATGTCAGCGACTCAGACTCACTGAGCAGTATTCCACGCTGTACCCAGTTTGCTGAGTATGCCGATATGTGTGCAGTGAATGGTGTGGTCATTACATCATGGAGAAAGAAGAATATGTGTGGTATCACATGTCCAGCAGGAATGATTTACACCCACTGTGGAAGTGCCTGCCCTGCAACCTGTGGTGATCCCCATGCTCCAAACACCTGCACCAAACCCTGCGAGGAAACCTGTCAGTGTCCGGAGGGGCTGCTCAAGGAGGGGGACAAGCTTTGTGTGCCACCGTCTGAGTGCGGATGCACAGATAAtggatgttactttgagCGTTTCACCACGTTCTACCGCTTTGGATGCACTGAGAGAGGCTTATGTGGGTTGAAGGGAGAGGTGACCTATGGCAAGAGCCAGTGTGGACAAGACGCGACCTGCGGGTCAAAAGACGGTGCATACGGTTGCTTCTGCAACGATGGATTCTCTGGGAACGGCCACCAGTGCACCAATGTTCAAGATGACAAAGCCTTGCTTACATGTGAAAGTGAAGTCTTGAACATCGACTGCGGGTCAGGACAGTTCATCGATATAGTGGAAGCAGTCTACGGCCGAATAGAGGACTTTGAGAAATGCCCCACCGAGAAACAACCCAAAGGAGAGTGCAAATCACAATCTGCAATGAGTGTTCTCATCGCCAAGTGTCAAGGCAAGGAGAACTGCAGGTTGGAGGTCTCCTCAGAAGTCTTTGGAGATCCTTGCTATGGTGTCAACAAGTATCTAGAGGTGGACTTTGAGTGCACGGCGACTCCCAAGCCTAAGACTGTATCTGGGGAGGTGATGAAGAGGGTGTGTCAGGGTGACTCCATGGAGATTGACTGCGGAAACTTGCTCATAGAGGTCACCGATGCAGTGTATGGACGGGTGACTGATGGTCAAGTCTGTCCTGGTGGCCACATCGAGAGTGTGGACTGTATGGCCCCCACCTCACTAGCGGTCATCCAGCAGTTGTGTCACGGAGAGACTAAATGCACAGGACTTCAAGCAGCTAGTCATCTGTTTGGTGGGAATCCATGTGGCAGGACCTTCAAATATCTGGAGGTGAAGTACAGGTGTAGTTCTGAAGTCGTACCAAAAGCCAATCTACCTGCCAGCCCATGTGCTGAGAATCCCTGTCTGCACGGTGGGCAGTGTGTGACGGTGGGGACCTCCAGGGGCTACAAGTGCACCTGTCCTCATGACTGGACGGGACCAAACTGCGAATTTGAGGAAGTCAGCTGTCGCGCATCAGGAGTCTCCCACATCATGGACTTCAACGAGCAAGACTTTGAGTTCTTAGGTGACTCTGAGTATGACCTAGCCAAGAGTTGCCTCGAGAATGAACACGACTTCCGAATCATAATTAAGAAGGCCAGAATGCCGACTGAGAACAGTGTGTCAACAATTGAAGCTGTTCACGTCCATTATGATGGCAAGGAGATTGAGCTCAAGCAAGAATACAAGGTCCTCATGGATGGCAAGAAGGTGTCGGACACGATGAACCTCAACTATGGAAAGATCCAGTTGTGTCGAGTTGGCAACTACCTGCTCCTTAAAACTGACTTTGAGATGATAGTGGCCTGGGATTGTCTTCACCGTGTGCAAGTGAGGATGCCAGACAATGTGGCCAGACAGACCTGTGGGCTGTGTGGTACCTACCATGGGCTCGGTAACGAAAACGAAGGATTCATCGACAGAGATGGAAACAAGGTTGAGGATATTAATGCCTTTGGCTCCAGCTGGCGCGTTGCTTCTGATGCTCCAGCTTTTGTCCACACTAATCTCATCACCACGCATGCCTGTACAATGTGGTCATCGCGGGCACATGATGCAGCAAACTTGTGCGCAGAACTCAAGAATGAACGAGGTGTATTCAGAAGCTGCTTTGCCAAGGTTAACCCAGACACTTACTACCGCAATTGCATGTATGACATGTGTGCGACACTACCCAGTCAGGAGCTGGTGTGCCAAGCCATGGCTGAATATGCAGATATCTGTCTGGATGAGGGAATCGTCATCGACAACTGGAGGTCTGCTTTCAGAGATGGACAGTGTGAAATGGCGTGCCCCAAAGGACAGGTGTACAGTGCTTGTGTTCAGTCCTGCCCCAATTCCTGTGGTGATCCACATGCTGGAAAGGAACCTTTGGACAGGTGTTATGAAGGGTGTACGTGCCGAGAGAGTGGACACTTACAAGACGGCGACCAGTGCCTGACATCTGACAACTGCGGCTGTCAACGATTGGGTATCTATTACCAGCCTGAGGAGAGGGTCGTCAATGACCAGTGCACCGGGCAGTACGTTTGCCTTCCAGGAGGTGGGTGGGATGAGAATCCGTTGACCTGCGATGCTAACGCTCACTGCGGAGTGGTGGATCACAGACAGGGCTGTGTCTGCAACGACAACTATGCAGGAAGTGGGAAACAGTGCTTTGATGCTAAGCTTGTCACTGCCAAGTCTGCCTCCCAGGGCGAGAGCCTCCACATTGATTGCGGAGATGATTATGTTGACATCATCTCAGCCGACTACAGCTACGTTGATCCAAGCAGTGCTGGTGCCACCACAGATTCTGATTGCCGCGCCTCCAATGTCATGGACGTCTTGGCCAACCACATCTCCCAAGACGGCAAAGTTCTTGAAGCCAAGGCATCCGCCTACCACTTTGGTGACACCTGTCAGCAGACTGGCAACGTCTTGACGGTCAGGTACTTGTGCTCCGTGCGGCCTATTGTCCGAGAAGTAGAGCTTGGCAAGGTGGTGCACATGAGGGGATGCCAAGAAAGGGAGATCTCCTTGAAGTGCAAAAAGGGGTCACGGATAAGGATCATGAAGGCTGAATATGGACGGCAGACTGGGAGCGAGGTGTGCCAGAGTGCTTACAACCAGCATATAATGACCACAAGTTGCCGAGCCTCAACAAAGCGAGTTGAGAAGAGGGTGCGAAGACGTTGTGACAACCGTGAGGAGTGCCGCATACAGATCAAGAAGCGTAAACTGCGAGTGAACCCTTGTAAGGAGACGCCAAAGTATCTTGACGTCACCTACAAGTGTGAGGATTATGAGCCTAACTAA

>Agib-Sfp5 (g22444.t1)

ATGGCTCTGTTCGGAGCGGTTGATCTGGAGGGGCTACGAGATTTTGCGTGCCACAAACCGGGGCGCCCTCTGGACCCCAAGATGGCCAACCTCCTACCATGGATTCTGGCCCTATCCTTCGCCTCGCTATCCTACTCGGAAGCCAATGACTTGAGCTGTTCGTATCGCGACACCGATGGCTCGGGAGATTTCACATTCGATGATCTAGAGATCACAGATCCCGAGTTTACCATCGCCTTCAAGGTGTTGGCCAACAGTGATGTCAACATCATACTCTCCCCCTTGAAGAAGGAGGATCCTGCGGCCTACGTCATCACCATCGGGGCAAACAATAACGAGCTGACCACAATCAGACGTTATGGCGGCGAAGTGCTGAAGTCGTACAGCGTCACTGAGGCCACTCCTTTCCGCGAGAGTGAGCTGCGATGCTACGACAGTTGCATGAACGCCTACTACATCTGCTTCGAGAATGGCATGATCCGGGTCGGACGCCAAGGTGAAAGCGCCCCTTATTTCTCGTACGATGTACCCGAGGGTGAGACCTTCAACCCGAAGAATGTGGGCTTCGGCACCGGCAGCACCAAAGTTGGGCTTTTTGCAGACTTCCTTTACGATAAGGAATGCAAAAGAGATTGTGTGGCTGTCGACTGCACCGGAGTTACTTGCCTCTTCGGCTTCAAGAAGGACGCTCGGGGTTGCGACTCCTGCGAATGCAAAGATTCTCCCTGCGAGACTCTGTCTTGCGCGCCATGCAAGCATGGTTACGTGAAGGACGAATTCCATTGTGACACTTGCGAATGCATACCAGGACCTTGTGATGAAGAACCTTGCCAGAACAACGGATACTGCTATGGTGTGGGCACCACCGACTATGGCTGTATATGCACAGAGGGCTATGACGGGGACAACTGCGAGAATGATGTACAGAACCCGACCATCACCTGCCCGATCGACATGGTAACCACAACAGATCCTCAGTCTGCCGTGGCCACCATCACCTATGAACAAGCTACAGGGTCTGATAACTCTGGCGTGGATCCGTCCATCGTATGCTCACCAAACTCGCCCACGTTGCCAGTAGGCGTCAAAACTGTCCAGTGCATTGCGACAGACGGAAGTAGCAACACTGCCTCTTGTACCTACACGATTACCGTAAACGATGAAGAGGATCCCGAGTTTGACTGTCCGCTCCCCATGGACAACACTCCAGTCGACAGCGGGCAGCCCGACGCAGTAGTCAACTACCAGATTCCGGGAGTTACAGACAACGTGGATGAAGACATCACGGTTGAGTGCACCCCAGCACCAGGCTCCAAGTTTCCGATCGGACGCACGGATATCACTTGCACCTCCACTGACAAAGCCGGCAATACAAAGACCTGTCCGTTTTACATTGAAGTTGTGGATGACGAGGGCCCAACGATTGAGTGCCCTATCGACATGAGCCAGCCAACAGACAGTGGGTCACCTACTGCCGTTGTGACCTATGACACGCCCGTTGCAGTGGACAACAACGACCCCAATCCCACAGTCGTCTGTGATCTTCCATCCGGGTCGAAATTCCCCGTCAAGGCTAACGAGGTCGTCTGCACTGCATCCGACAACATTGGGAATTCGGAGAAATGCACGTTCACTATCACTGTCAACGagtcctgcaactttgaggtgacagtcaaagatgaggaaaagccaaagatcagatgcccgctgcccatgcccgacgtcttgaccgacccgggcaagccgattgccgtggtccccttcccagacccatcatcaagtgataacgccgaccctgacccaacggttgtctgcaacccaccagccaattccgagtttcccatcggcaccactcgagtcaaatgcacatcaacggatgatgccggcaacttcgccacttgcccgtttgaaatcacggtATCAGATGAGGAGAAACCGAAGCCTTCGTGTAGAGAGGATCCTCTGCAGCAAAATActgatcctggcaaggattttggaactgttgactacgagactccatctgccacggataacgcagacgactctccagcggtgacatgccaagaaccatctgggtctgagttttcgctgggcacaaccactgtcacgtgcacggctttcgacaatgcgggcaacgaagagtcctgcacattcgatatcgctgttgtagatgaggaaaagcctaagctggaatgtccactgaacatgaccgagcctgttgacgctggggaagactctgctgtactcgacattgtggcgccggaagcgagcgacaacgccgacctgaccccagatgttgtctgcacacccccagagggacagtttgatttccaattgggcccaaacccagtcacctgcattgccactgataactcaggcaacttcgaagagtgcacatacatagtaaccgtcgaagATAACGAGGGGCCAACCATCAAGTGCCCGCTGCCCATGCCGCAACCAGCCGATCTTGGCTCTACCACAACGGCCGTCACCTACAACGATCCGATTGCCTCGGACAACTCTGACCCTAACCCAGTAGTGTCTTGCACATCAGCGTCTGGGTCTGAATTCGGAATCGGGGAAACCAACGTCACATGCACTGCTACCGACGATGCGGGCAACAGTAACGAGTGCTCCTTCAAAGTCATCGTTACGGATGCTGAACCGCCCAGTTTTGAATGCCCAGCCGACATGATTGAATCCATGGAAATTGGCAAACCGTCGGCTGTCCTAACCTACACTCTCCCTTTTGCCATTGACAACTGGGATTCCGAGGTTGCTGTGGTTTGCACACCAGCGTCTGGCTCAACGTTCAAGGGTGGGTCAACTACCGTCGTCTGTTCGGCCTCGGACGATTCCGGCAACAAAAACAACTGCACGTTCACTATTGAAGTTCAAGATACGGAGAAGCCGGAGATAACATGCCCAATCGACATGGAGGAGTTTGTCGATGCCGGTAAAGCGTACGCCACTCTTGACTTTGATAAGCCTGCTGTGACAGACAACGCCGCCCTTCGACCCAAGGTCTCTTGTGACAAAACCCCAGAGGTCGCGTCCGCGTATGACATCGGGACCACGACAGTGACGTGCACCGCCGTCGATGATTGGAGCAACTCCGAGGAATGCTCCTTCACTATCAAAGTGACTGacaacgaaaaacccaagatcacctgccctatcccaatggattctgttcccactgacggtggacaatcgtccgccactgtcacctttgcccctcagtccgtgtctgataatgccgatcctgccccgatcgtcttctgcgagaaaccctcgggctcagagttcccaattgggaagtccacggtccagtgtacagctactgacaagtacgaaaactctcagacgtgccagttttacatcatcgtcaaagacaaggaaaagcccaagatcacatgccccatcgacatgacccctgcgactgacccgggtgcgccggatgccacggtcacctacccagctcccacagtgaccgataacgacgcggtcacgtacacctgcagcaaggcctctgggtcgaagttctccttcgggccaaatgttgtcatctgcactgccaaggataccaccggcaacgaagcaacgtgtactttccaaattgacgtgaaagATGAGGAGAAGCCACGCATCACTTGCCCAAATAGCAAGACCATGCGAATGGATGACGATCAGGGCTACTCTACCATCTCTTACGACAGTCCAACTGCATCTGATAACCTTGACACTTCACCAGACGTTCTCTGCACTCCACCATCGTCCACACAGATCTTCCAGATTGGGCCGACCACTGTCACGTGCAATGCCGAAGATGACAACAGAAACAGCAACCAGTGCGAATTCACCATTACAGTGAAGGtcggagagaagacagtgacttgctctgctactgacagcagcaccaacaaggaaagctgctcattcactgtgacgatcacagATGATGAAGCGCCCTCTATTGATTGCATGAAGACAAAGATCTCGCAGACCACGGATCCTGGTCAGGCCTACGCATCGATCAACTACGAGTTGCCGACTGCCTCGGACAATGCGGATCCCAGTCCAACTGTTAGCTGTGACAAGGTACCGGGCTCCCAGTTCACGCCCGGCACGTACGTGATTACGTGCACTGCCACAGATGACAGCCAAAACTCAGCGAGTTGCCCAATCACAATCACGGTCACAGataaggagcctcctaagctgaaagactgcccagtgtccatgctggacgaaacagacactgaccagagctttgccaccgttgtgtacactgagccgacagctaccgacaacgtcgacaaatctcccattgtgagctgcagtccgccatccaactcacaatttgacattggcactcagatggtgacatgcacagccaccgactctgccagcaacgtggcctcgtgcgacttcaatgttcaagtcaaagataagcaaaaaccagaggtcatgtgtcccattgacatgtcgaaaaaagccgacccaactaaaaagtctacctatgtgagcttcgtcgacccccgcggcagtgacaactctggcttggagccttcagtcaaatgtgatcccccctccagctccgagtttttcatcggcgataacactgtcacttgtacagcgacggatgcggctagcaaccatgaagattgctcgttcaccattacagtAACTGATGAAGAGCCACCTACTGTCTTTTGCACGGACAACAAGAAGAGAGTTCTGGATGCCGGCAAGGACTATGCCTCTTTCATTTTCTCCCTTCCGACGGCATCCGACAATTTTGACCAGAACCTAGTGGTGACTTGCGATCTCCCGACAGAATCGACTCTGAAATTGGGATTGAACACGATTGTATGCAGAGCCAGCGACACTGCTGGCAATGAAGGAACCTGCTCTTTCGTCGTGAGAGTCACCGatgaccagccacccgagttggaatgcccagacgctgcgttcatggagacagaaccaggggtgtcgacagctgctatctcctacacggtccccactgccaacgataacgtggacggtagcattacagcgtcttgcactccagatacaggtgatcggctgagcgtcggtgagaacaccatcacatgctcagcctccgattctgctgggaacactgagacctgcttgttccctatcacgattgaagacaaggaacagcccagcttcgactgcccccttcccatgcccgatgtgactgtggacacggacaaggactatgcgaccgtcacttacacaacacccgagtcagtggaggacaacgttgacaaggacattgcagcgttgtgtgacaaggaatcgggcgcacaattccccatcggaacttctgtggtgacgtgcagcgctaccgacgctgccggcaacccaagttcatgctcgttcaaagttggagttgtagacaaggaagacccggttgtgaagtgcccaatagacatgaacgccaagacggatcccagccaagactacgccactgtctcctacccggctttagaggccaccgacaataccaacagcaacctggtgataacctgcgataagctcacgggctcacaattcccaatcggacccaatgcggtaacgtgcaccaccgaagacaatgccggcaatgtgggctcgtgcacgttcaacattgacgtAGTCGatgaggaattACCGACAGTCACCTGCCCAGACAAGATGGACGGTCAACCCACGGATCGTCGGGCCAATTATGGCACAGTAGACTATGTGATACCCACAGGAAGTGACAATGCCGACACTAGCCCAGTCGTGTCTTGCGACAAGCTGCCTGGCTCCAAATTTGACGTTGGCAGTAATACAGTCACATGCACGGTCACCGACAAGTACGGCAATAGCAATCAGTGCACCTTTGACATTGAAGTTGTCGATGAAGAGAAGCCACAGATCACATGCCCTCTACCCATGCCCGACGTGACAACTGACGACGGCGCAGCCACAGCACTGGTCGGCTACAATTACCCAACGGCAACTGATAACGTGGACCCCAGTCCGACTGTCACATGCACGCCCGAGCCCAATACGCAGTTCCCCATTGGCGACACTACCGTCAGATGCAAGGCCGTGGACAGTGCCGCCAACAAGAAGGGCTGTAACTTCATCGTGACTGTGACAGatgatgaggatcccaaaatgacatgtccagttgacatgggcccaaccactgacctcgacaaagactttgccactgtcaactacgacattccgcttgccactgacaacgtagacaccaatctggtagtggactgtcaggagccatccggttcggagttttcgttgggcgaaaccactgtcatttgctcagtttccgacagcgcaggcaataccgtgacctgcccgttcaagatcaccgtcacagATGAGCAACAACCAGAGTTGGACTGCCCTCACGATATGACCGAGCCCGTTGATGCTGGGGAAGACTTTGCGACCGTCACTTACACGACGCCGATTGCAATCGACAATGCTGACCCAGCACCGGACGTGGATTGCCAGCCAGCTGCGGGCTCCCAGTTTGGCGTTGGCCCCAACGAGGTCACCTGTACGGCTGATGATGAGTCCGGCAACAGCAACACTTGCAAGTTCAATATCATAGTGGAAGataacgaggggccgacgatcaaatgcccgatccccatgcctgaggccgctgatttgggaggcacctctaccactgtggactacgatgcccccgaggtgtctgacaacaccgatcccaatccggacgtgacttgcacacagctgtccggtacggtgttcgagatcggagacaacgaggtgacatgcacggccaccgacgatgccggcaatagcaacaagtgttccttctcagtcatcgttaaagATGCTGAACCGCCCCAGATAGAATGCCCAGTGGACATGGTGTCGAGTATGGACCCTGGAGAATCGTTTGCCACCGTAACCTACGACCTTGCCACTGCAATTGACAACTGGGATGCCAATCCACTGGTGACGTGCTTCCCGCCCCCGGGCTCGGTATTCAACGCCATTACCACCACCGTGGTTTGCTCGGCCGTCGACGCAGCGCATAACAAGAACAACTGCACCTTCTCCATTACAATCGAAGATAACGAGAAGCCGAAGATTACCTGCCCTGTCAATATGGATGAGTTCGTTGAACCCGGGAGGAACGTGGCCGTCGTGGAATTCGACAGCCCGACTGCGACAGACAACGCAGACCCACGGCCTACCATTCGTTGCAACTCAAAATCGGGTGCTGAGTTTGAGGTTGGGACCACGACTGTCACCTGCAGAGCCATAGATGCTTCTGACAACAGGAAGGTTTGCAAATTTGACATCAATGTCAAAGacaacgagccacccaagttcaagtgcccggcctccctcaacagcatttcaatggatcccggcaaagccattgccactgtgggctacattcttgatactccaactgacaacgccgaccctgcgccgactgtcgtgtgcaacccagcagctggctcagagttcccgctgggaacaacaacggtcacgtgcacagcgagcgatgtcTATGCCAACTCCAAGGATTGCAGTTTCCAAGTTGTGGTCATCGatgacgaaaagcccgagtttgactgcccagttgacatggacgcgaaaactgacgtgggtgtggcaacaggcacggtaacctacaccacgccaacagccaacgataacgtagacggcgagataccagtgacctgcactccagagtccggtaccgtgtttagcgtcggagtgaacatcatcatgtgcacctctactgactccaatgggaatacgcggacatgcccgttcaacatcacagtcaaagATGAGGAAAAACCGAAGTTTGACTGTCCTGTGGACATGAGTAACATACCTGTCGACCCCAATGAGGCCTTCGCTATTGTGTCGTACCCCCAGCCCGATGGGACAGACAACGTGGATTCCAACATCCAAGTGTATTGTGTGCCAGAGCAGAAATCTAGGTTCCCCATTGGCACTACTGAAGTCACTTGTGCCGCCACTGACAAAGCCAAAAACTCTGAGCGTTGTTCCTTCGACGTTACGGTCGTAGATGATGAAGGACCCAAGTTCACGTGCCCCATCCCCATGGTGCAAAAAACCGATCCTGAGTCTTCAACTGCCGTGGTGTTCTACGACGCACCGATAGCGGAGGATAACGCAGATGGGTCCTTACCAGTGACGTGCGAACCAGCAAGTGGCTCTACGTTTCCGTTTGGAGTCACCACTGTCCAGTGCAGTGTCACAGACTCGAGTGGCAATGTCGCTGATTCTTGCCAAGTCCCGTTCACTATCACAGTAGAAGacaaagaaaaacccaaggttacctgcccgatcaacatggatgacattcccagtgcccccggtgacagttctgccactgtggattacaccattcaagacgcacaggacaatgtggatgggatcattcctctcaattgtaacaagcccccaggctcaaagttccccatcggcaccacaacggtactttgtactgcaacagatgcatctaccaactcagcatcttgctcattcactgtTCAAGTCGTGGatgaggaaaaaccggaattcgactgtccaatcgacatgacccaaaacatggacaaggggtcttcgactgccaaggtaacctataccgtacccacagcaaccgacaacaaggatggcagcgtaccagttgaatgtgtcccggcttccggctcggcatttggcatcggggcaaccactgtcgagtgcaccgctgttgattctgccggcaataaaaagatttgcccattcactatcaccgttgaagATAAGGAGAAGCCTGAGCTGGATTGTCCGGTGGACATGACAGACATCAAAGTGGACGCAGGACGGGCAGATGCCAGAGTGGTCTACCCAACACCAGAAGCCACCGACAACGTCGGTGGTGTGTTCAAAGCCACATGCGTCGAGCCATCGGGGTCCAAATTCCCCATCGGCAATTCCACTGTGAGGTGCAGTGCTACCGACCAAAGCGAAAACTCTGAGGAATGCACATTCAAAATCCAAGTCAAGGacaacgagcttccatcatttgaatgcccagtctcaatgactgagcccactgacgccggcgtgaaggatgccgttgtgacgtaccccgtaccaacggccaacgataacgcagatggctctatcccagtgacctgcatgccggagtccggctccacgtttccggtcggaacaacctcggtgttgtgctcagccacggattcatccggcaatacccatacatgcccgttcccaattactgtcgaagatcgcgaactgcccaaatttgattgcactgatgacatgcatgtcttcactgacagcggcaaaaactacgccactgtagactacccagaaatgccggtaaccgacaatgtggacagtaatctggaggtcacttgcgtcaaaccatctggatcgcaatttggcattggagacaccaaggtcacgtgctcagccaccgactctgctaacaacaagaagacatgcaccttcactgtttacgtcacggataaggagtcaccagaatttgaatgtccagtggacatgagccaacccacggatgcaggcaaccccacggccgcggcagcgtacactgaacccacatccacagacaatgttgacggaatcaagcaagccaagtgcctccctgcaccagggaaggttcttcctgtcggccccaacacaatcacttgcacggccactgatagtgtcggcaattcagcaacttgtacattcacgctcactgttgaagataaggagcctccaaaggttgtgtgccctattccgatgaaagatgtctcggt**ggatcccggtcagaactacgccactgtcaactaccccgatccgacagctgaagacaacgttgactgcagcacaaccttcgccatcacctgcgttgagccacaaggctcacagttccctctcggagagagcacggtcacgtgtacaaccactgacatggccggcaacccaggaagctgcagtttcaccatcaccgttgTCGATGATGAAGCACCCAAGTTTACATGTCTGGACAGAATAACTCAACCCACTGATGCTGGTATGCCCACTGCAAGTGTACCCTACACAGAACCCACAGCTACCGATAATGTGGACAGTGCCGTAGCTGTGTCTTGTACTCCGGCGCCCTCAACCGCATTTGAGATCGGAACGAACACTGTCACATGCACTTCTCAAGACTCCAGTGGCAATAAAGACACCTGCTCCTTTGAAATCGTCGTGGAAGacaaggaagcgcccaagatcacctgtcccatcgatatggacaatcaggccccagatcagggggcaacctttgcaaccctcacctacccatggcccacagttacagaaaacagccccgccattcctacagtgacctgcgatgtacagccaggggcccagttctccattggtaccaccaccgtcacgtgcacggcctcagacccttatggaaacgctgcagattgctcattcactgtggaggttaaagACGTCACACCACCA**AATGTCAACTGCCCAGCCGATATGACCTTTGACACGCCAGATGATGTCATATTCCAGGCCAAGGATGTCACTGCCATAGATGACGATGGCACAAGCCGACCAGTCACGTGTGACAACGCCCAGATAATATATTCTAGCGGCGCCAACTCTATCACCTGCCGCGCTTCAGATGCGAGCGGAAATGAAGCCTCGTGCTCATTTAATATCATCATTGACCCGCCAGTGTGTGCATTCCCAACTGAGGTCAACAGCTACAACTACTACGCCCCGTGCGCGACCCCGCTCAAGCCTAACCATCGCACCAAGCTGTGCTTCACTGGGTCCAGTGAGAGCTACATGTACGTGGGCATTTGGGATAGACAGTCTCCAATGTACAACGTTGAAATGCTTGATCTGATGATCGACGGAGACTCGCTCCAGATTACTCTCGGAGACAACATCCAAATGGAAACCATTACTGGTTTCAAAACCGGAGACACCCTAATCTGCGTCGAACGCACTGCCGATGAAATCATTCTGACACACGACGACACCCCGCTCTTCACGCAACCGACCAGCGAACCCTTGACACAAATTGGCTTTGCTTCCAGCTTAGATGCCTACTGGATTACCCAGTCGGTTTTTGGATCACCAGGAGCTAGTCGTCGCCGTCGGTCTGTTGATGATTCTGATCCCATCAGGGCAGCTGTCAAGAGACGTCGCCGACGATCAGCCGCTGACGTTGATCTATTGACCAGGAAACGCCGTTAA

>Agib-Sfp7 (g22446.t1 but 1344 bp shorter)

ATGGCGACATCTAAGTTCATAGTCCTCCTTCTGGCCGCAATATCAGCCACTGCCATCGCTCAGTCTGATCCATCCAACCACATGTGTCAACTGTACCAAACTGAAAAGAACACTGAGATACAGTGGCTGCCGGACACTCTACCAAACCCGCGTTTTCAATTCAACTTCAGAGTGATTGCGCTTGCTGATGTGCGCATTGTGCTGGCGGAGAGCCCACTTCCTAGCGCAAAAAGAATCATTATCGGACTTGGAACGGCCAGGAACAGCAAGTCTTACATTTTGCGTCCTTCCGGTCGCCAGGGTGAGACCAGAAACACTCCGAATGAATTGAAATGTGACCGATTCAATGAGTACTGGTTGCAGTTCGAGCCAAGATCGTTGAAGGTTGGAAGGGTTGGGGAAAGGTTTCCC**TTCATTGAGTTCGACATTGATCCCAACAACCCGATTGTCCCTAAGCACGTGGGCTTCGGTACCAGCCCCGCCAGCGTGGGGGTCTTTAGCTTCAGTGATTTCAAGGAGCACTCACCAATCTTCCACGAACATGTGTTTATGACTGACAAGGGTTACTGCTACGACTGGACTCTGCGCCCGTGGCCTATATCCGCCAAGGTCTGCTTCCAAGTCAAGACTGAGGGGATCGCAGCACTTGCCCTCTCGCCAGAGAAGGATCCATCGGCTGGTGAACTAGTCTACGAAATTGAACTCGGATTCTCGAACAACCAGCTGACCGTTCTCCGCCGAGGAATGCACGGGGCTAACATCGCGGTGGAATCCACTAAAGACATCTTGGACTGCGATGAGTTCCGGACCTTCTGTCTGGAGGCTCGCGGGCCTCGGATAACCCTGACGGCCCTGGGCGATCCCAAACCCATCCTGGACTTCACCGACGAGGAGCGGCCCGAGGTTATTTACCGGTACATCGGCTTCGCTGGCGGGTATGACTTCCAGGTATGGTGGAGATGGCCGGTAGACATGGTGCCAGATTACGAGGTACCCAAAGAACCAGAAATTGTTCCCGAACCACAAGATCCATGCCAACCCAATAACCCGTGTCTGAATGGGGGGAAGTGCACCAATTTGGGAGGTGGGAAGTACTCCTGTGCATGCATAAACAGATACAGCGGGGACAACTGCGAAGTAAAACCAGACAATCCAAGCGGCAGTGACGTCAAAGTATC**GACAGCAGAACCGCCGCCCAGACCACGAGATCCGTGTCGTCCAAATAATCCATGCCAAAATGGAGGAATTTGTAGCAGTTCTGGGATCTCTCAGTACAACTGCCAATGCATGAATGGATACAGCGGAACCGACTGCGAAATAGAACCTGATCCGTGCCAACCCAACAACCCTTGTCAGAATGGCGGCGTTTGCATGCCTGCTGGCGGTATGCAGTACAACTGCATGTGCATGAACGGGTACAGCGGACAGAACTGTGAGAACGAACCAGatccttgccaacccaacaacccatgtctgaatggcggagtttgcacACCTACAGGCGGTATGCAGtacgcctgcagttgctcaaacggatacagtggagaaaactgtgagatcgAGCCAGATCCATGTGAACCCATTAACCCTTGCCTAAATGGTGGAAGCTGCAGCAGTACTGGAGGTGAAGCATACTCCTGTGAATGTGTGGACGGCTACAGTGGAGACAACTGCGAGACAGAGCCAACCCCAACAGACTCGATCACCATCATTACCGAGGACATTGATGAGACCAAGTTCCCGGACATTCCTCCACTTACCCCTGACGGCTTGTACGAAATCTGCATCGTGGTAAACCCTAAAAAATTCGTCTTTATCGTCATCTATGCGTCCAGAGAGGACGTCGGACAGGAGCCTGCGCTCTACGATTTGACGTTTGAGCCAGGAGTACCGGCGAAGGTCGAGTCGCAGGGTCAGCAGGTAGGCCAGGTAGTGGAGTGGAGCGGAACTCTGTCGATCTGCATCGCGATCGGCGACCAAATCGTCATCTACCGAAAGGACGGTGCTCCAATGTGGACACTACCCAAGCAGGACGTCGAGCACATTGAAATCGGCTTCAGCTCCAGTATCGAGACAACGTGGACAATCACCACTGAAGAAAACGAGGAACCAACCGAGCCGGAAAACCCTAAAGAGCCGCCAAGGGATTGTCCTCAAATACGCTGTGCATATCCCTGCCCCAAAGGTTACAAGAAGAGTGAAGATGGATGTCCCACATGCGAATGCAAAGGGAAACGCAACCGTGGTGGGGTCTGCCGAAACTTCGAAATTGCCCTACCCAAATTTGCCGCCAAATTGAGAGACTGCGACAAACGCTGCAAAGCTGACAACAACTGCAAGCGACCGTATAAATGTTGCTCTACCGATTGCGGCAATGTTTGCACGAAAGCCTGCAAACCCGTCCAATGCAGGAAGAAATGCCAATTCGGTTGGAAGACTAATAAGAGAGGGTGTGAAATCTGCAAATGTAAAGAATCGCCGAAGGAGATTCCATCCCCTGAAGAACCACCACAAGagccggaaaacccatctcctgaagagccggaaaacccatctcctgaagagccgCCAAAGGGCTGCAAACCCGTCAAATGTAGGAAGAAATGTCTGTTCGGTTGGAAGAAAAATAAGAGAGGGTGTGAAATCTGCAAATGTAAAGAACCACCAAAAGGAGGTGAGCCAGAAGCGCCCGAACCAGCACCGCCCTGCAAACCCGTCAAATGTAAGAAGAAATGTCTGTTCGGTTGGAAGAAA**AATAAGAGAGGGTGTGAAATCTGCAAATGTAAAGAACCACCAAAAGGAGGTGAGCCTGAAGTGCCCGAACCAGCACCGCCGTGTGCTTCGCCAATGTGTATATTCCCCTGTCCAAAAGGCTACAAGAAGGATGATAATGGTTGTGATACTTGCGACTGCAAAGGCAAAGTTGAACATCGAGGTACAtgcccggtcctcgagggggtagctgggatatgttcagaggag**tgtgccgttgacaacaactgtcagagaaaggaaaaatgttgcagcaacggttgcggccatacttgcatgaaagCATGCAGAGCCCCGAAATGCAGGAGATCCTGCGAATTTGGTTTCGAGAGAGAAGACGGATGTGAAACCTGCAAATGTAAAGCGGGACCTGAGCCGAGTCCCCCAGAGGAACAACCTCCAAGAGAACCACCTGCAGGGAGTGAACCTCCAAAGCCTAAGCCAAAACCAGAGAAACCCAGGCCAGGACCACCAGCAGGAAGTGAACCCCCGGAGCCTGAACCAGAGGAACCTACGTGCCCAGAGCTTACATGTGATCTAGATTGTTCAGATGGTTTTGAATTGGGTGCAGACGAATGTGAGATATGCGACTGCATAGACATCCCGGACGAAACGGACAGCGGGCAACCGGAAGACGAGGTCGGCACGTTTCTGACCACCACTGGGGGCTCTAAGGAGATCATCATCACCAAGGAGGTGGACACCACGCAGGAGCAACAGTTCACCATTGACAAAGAGAACCCAGTGGAGTTCGTGCTGACCTCCGCTGACGGAGAGCTGGGAATTGTTGTGGTCAAGACGTACGTGAAGATCGTCACATCTAGCGGCAAGACACGTAAGACCGTGAAGCTGCCAAAATGGTGTCTTGGGCAACGAGACTTGACGTTCTCCGTCAGTTTCATCACGACCGGCTTCAAGCTGCACATCATCAAGACGGTCGGAGGTGTTGAAGAGGAGCTGTTCTTGACGAAGTATGTCAAGACGAGTGGGAGGAAGTTCACCTGCCGAGCAATCAAGCTGCGATCGAAGGGTAACAAGAAGTGTACGGTCAAGTACAGGCACAGGCGCAGACGCAGAGGACGCAGAAGCAGGCGAGGAAAAAAAGGAAAGCGAGGCTTGAAAAAGAGCAAACGAAAAGGAAAGAAGGgcaagaagtctggaagccgttcaaagagtgtaggaggaaaacgaaagaagggcaagaaatctggaagccgttcaaggagtgttggaggaaaacgaaggaagggcaagaagtctggaagccgttctaggagtgtaggaggaaaacgaaagaagggcaagaagtcaggaagccgttctaagagtgtaggaggaaagcgaaagaagggcaagaagtctggaagccgttctaagagtgtaggaggaaagcgaaagaagggcaagaagtctggaagccgttctaagagtgtaggaggaaagcgaaagaaggGCAAAAAGTCAGGAAGCCGTTCTAAGAGTGTAGGAGGAAAGCGAAAGAAAGGCAAGAAGTCTGGAAGCCGTTCTAAGAGTGTAGGAGGAAAGCGAAAGAAGGGCAAGAAGTCAGGAAGCCGTTCTAAGAGTGTAGGAGGAAAGCGAAAGAAGGgcaaaaagtcaggaagccgttctaagagtgtaggaggaaagcgaaagaaaggcaagaagtctggaagccgttctaagagtgtaggaggaaagcgaaagaagggcaagaagtcaggaagccgttctaagagtgtaggaggaaagcgaaagaagggcaaaaagtcaggaagccgttctaagagtgtaggaggaaagcgaaagaaaggcaagaagtctggaagccgttctaagagtgtaggaggaaagcgaaagaagggcaagaagtctggaagccgttctaagagtgtaggaggaaagcgaaagaagggcaagaagtcaggaagccgttctaagagtgtaggaggaaagcgaaagaagggcaaaaagtcaggaagccgttctaagagtgtaggaggaaagcgaaagaagggcaagaagtcaggaagccgttctaagagtgtaggaggaaagcgaaagaagggcaagaagtctggaagccgttctaagagtgtaggaggaaagcgaaagaagggcaagaagtctggaagccgttctaagagtgtaggaggaaagcgaaagaagggcaagaagtctggaagccgttctaagagtgtaggaggaaagcgaaagaagggcaagaagtcaggaagccgttctaagagtgtaggaggaaagcgaaagaagggcaagaagtctggaagccgttctaagagtgtaggaggaaagcgaaagaagggcaaaaagtcaggaagccgttctaagagtgtaggaggaaagcgaaagaagggcaagaagtctggaagccgttctaagagtgtaggaggaaagcgaaagaagggcaagaagtctggaagccgttctaagagtgtaggaggaaagcgaaagaagggcaagaagtctggaagccgttctaagagtgtaggaggaaagcgaaagaagggcaagaagtctggaagccgttctaagagtgtaggaggaaagcgaaagaagggcaagaagtctggaagccgttctaagagtgtaggaggaaagcgaaagaagggcaagaagtctggaagccgttctaagagtgtaggaggaaagcgaaagaagggcaagaagtctggaagccgttctaagagtgtaggaggaaagcgaaagaagggcaagaagtccggaagccgttctaagagtgtaggaggaaagcgaaagaagggcaagaagtccggaagccgttctaagagtgtaggcggaaaacgaaaaaagggcaagaagtctggaagccgttctaagagtgtaggaggaaagagaaagaagggcaagaagtctggaagccgttctgggagtaaaggaggaaaacgaaagaaggGTAAAAAACCAGCCCCAGGAAAAGAGACCGCGATCGTGACAAAGGAAGAGGCGGAAACCAAAGTCATCACCGTGAGGCCGAACACCTTCCAGAAGATTGAGGGAATCGCAGGTTACGAGAGGAGTTTAGACTTCTCCTTGGATCCCAAACAGGGCATCACTTTCCGCTTA**GCTGAGAGGAGGAACGGAAAGGGCAAGACGCTGCTATTCGTGATACAAAACGAATGGAGTTACATGCAATTTGCCGGACAAGACCTCGGCCGCAAAATCAAGACGGAGAAGGGCATCCTAAACAGCGGCAAGAAGTCGTTCTGGATCAAGCTACCGAGCTCTCAGGACAGTGAGTTCTGGTTCGAGCTCGGCTTCAAGGGCGAGAGCAAGGCCTACCTCCGATGGAGTGTGTCTGACACCAGCTTCCGCCCGCTGTACCTCGATGTGTCCATCAGCGTGACGAAGATTGTTGAAGAAACGACGGAGGTATTCTATCCACAGTGGAATGTTCTCAGTGTACCAGTAAGCGAGCAACAGAAGTTTGAGATGGAATCGAACGAAGTGGCTCTGATAGCTCTGCAGCCTGGGAAAATAAGCAAGAAGGGACAGATCATTGCAGAGTTTGGCAGTCCCAGCAAGCCAGGCTGTCAGTTCCAGAAATGCATGGACAAGGAGGCCACTGAGTGC**GCCGGTAAGGCTCGGGTGTGCCGGGACAACGACGACACGGACTGCGTGGTCAAGCGCGCCGACAGATCCGCCTGCAACTTTGCCAAGAAACGCTCGATTTGGGTACAGCTGGTCGGCGGGGAGTACCGCATGGGCGTGTTGGGCAGTGACGACGCCATCAGCAGCTACCGAGTGAGCGCCGCCTTGGAGAGCGACTCTGGCCTGAAGTTGGCGGTTGGAACGCGAGGGGATGGCAAGTGGAGGCTGTTTTGA

>Agib-Sfp8-like (g22445.t1)

ATGGCGACATCGAGGCTAACGGTCCTCTTGTTGGCCGCAATGGCGGCTACTGCCATCGCCAGATCCGTTCCTGTGTTCACATGTCCAACGCTCCAGACGAACCAGGACAACGACGTGAAGTGGCATCCAAGCCCGGTACCATCGTCACACTTCACGCTCCACTTCAAAGTCGCTGCTGTTTCAGATGCGAAGATTGTACTGGCAGAATCCAAATCTGATAACTGCGATAGAATCGTCATCAACATCGGCAAAAACAGGAACTCCAAGTCTTCCATAAAGCGCTATCCGCAGGCGGGCAAGGTCAGTGAGTCCACTCCAGGTGAACTCAAGTGCGAACAGTTCAACGAGTATTGGGTGCAGTTTGACCCAAGCTCCGTACAAGTTGGACGAGCAAACCAGAGGGCTCCGTTCCTGAAGCTAGACTTGGATTCCGGCAGTCCCATCAACCCCAAAGTCTTGGGGTATGGAACGAGCAGGAACAGCGTGGGCCTTTTCTCCTTTGAACCCTTCGACGATCATTATGTTGATCCTTGCCTCAACAACCCGTGCCAGAATGGCGGCAAATGCGACTCGTCTTCTGGAAACGGTTACGAGTGCCACTGCGCAGACGGGTACATTGGAGAACACTGCGAAGACAAACCTGACCCGATCTGCCCTCCAGGGGTCGAGCTGGCCTACTGTCTTGTCGACCCATGCCAGTACGCTACCTGCGATGCTTACCCAGAGGCACAGTGTAGATCCAACTACT**GCGGCGGCTGCAATGCTGAATTCTACGACAGCGACGGAAATCTCGTTGAATGCAAATCCCCCAAAAATCGGccaggcatatgtccaacgccaccagagaacatggtagggctatgctttaatgcatgtgaaggtgacagtgattgccctggcgaacgcaaatgctgctccaacggctgtggccgcgtctgcaaggaacCTTGTAAAGAGGTTTTGTGTGAACTGTTCTGTGAAAATGGATTTGACGTCGACCCAGAAACCGGATGTGAAGTTTGCTCATGCAAACCAAAAGAATGCAAACCAGTCCTTTGTAAGATGGCATGTAAAAATGGCTACAAGAAGGACGAAGATGGATGTCAGACCTGCGAATGCGAAGCGCCCGTAACTCGCcctggcctgtgcccacctgtgcaagagggcatgtttggggcttgcgctaatgagtgtggcaatgacgttgactgccccggccagaccaaatgctgctccaacggttgcagccacgtctgcagggaacCTTGCAGTGAAGTCATGTGTCTCATGTTCTGTGAAAACGGATTTGATGTCGACCCGAAAACTGGTTGCCAGACTTGCTCATGCAAACCAAAAGAATGTAAAGGACTACTCACTTGTAGGATGGCATGTGAAAATGGCTTCAAGAAGGACAAAGACGGCTGTGAAATCTGCGAATGCGAAGCTCCCGTAACTCGCcctggcctgtgcccacctgtgcaagagggcatgtttggggcttgcgctagtgattgtgaaaatgacgctgactgccccggcgaaaccaagaaatgctgctccaacggttgcggccacgtctgcagggaacCTTGCGCAGAAGCCATGTGTGCCATGTTCTGTGAAAATGGGTTTCAGATCGATGACGAAACCGGATGCGAGATTTGCAAGTGCAAGCCTAAGGAATGCAGTCCACTCGCTTGTAGAATGGCATGTGAGAACGGGCTCAAGAAGGACGATGACGGATGCGACATCTGCGAATGCGAAGTGTCATGCCCATTACTCAAGTGCAGCCAGAATTGTGCTTCTTACAAGACGGACGAGCGTGGGTGCCATACCTGCGAATGTGAAGACTGCCCACTAGTCCGCTGTAGAATGGCTTGCAAGAACGGCTTCAAGAAAGACGAAAACGGTTGTGACACCTGCGAATGTGAAGCTTGCTCACCAGTCCTCTGCCGATTGGGCTGCAAGAATGGCTTTAAGACGAACGAGCAAGGATGCAAGATCTGCGCCTGCGCAGAATGGCCTGAACCCGAGCCAGAACCTgaagaagaagaggaagaagaagaagaggaggaagTCTTTGAGTGCCCGGGAGAC**ACCAAAGAAGTGACAATCGCGACGGAAGTTGACCCCTCTGAACCTCAGGAATTCGAGGTCGAAAAGGAGGAGCCCACAGATGTCATCTTCCATTCTGGAAGCGGGGAGATTGTCACCGTCGAGGTGGAAAAGACACACGCGTACATTCTTGGCGTCTTCGACGTCAAGATCAAGACCGTGGAGCTCCCAAGCTGGTGCTGGAAGATCCGCTCGCTGAAACTGATCGTTCGCTTCGTCACGGAGGGCTTCAACGTCTTCGTGCGGTCTGGCTCAGAGGATACCCCGCTCATGGAGTACAGGAAGCCCAACCGCGGCCTGTTCACCTGCGGCCGTATTGGATTCAGATCCAGGGGCAAGAGGCAATCCAAACTCTACTACCGACGCAAACGGCGCGGAAGAAAGGGCAAAAAAGGTCGCAAGAGGCCAAGAGACAAGAAAGGATCACGGCCTAAGAAAAACAAGTCCAGGGGTTCCAGAAGTTCACGGCCTAGAAATAACAAGCCTCAAAAGAACAAGCCGAAGAACAGGTCCGGGAGTTCCAGTGgtttaaagcctaagaagaagaacaagccgaagaacaggtccagcaattccagtagagcaaagcctaagaagaacaagccaaagaagaggtccagcaattccagtggagcaaagcctaagaagaacaagccaaagaagaggtccagcaattccagtggagcaaagcctaagaagaacaagccaaagaagaggtccagcaattccagtagatcaaagcccaagaagaacaagccaaagaagaggtccagcaattccagtggagcaaagcctaagaagaacaagccaaagaagaggtccagcaattccagtagagcaaagcctaagaagaacaagccaaagaacaggtccagcaattccagtagagcaaagcctaagaacaagaacaagccgaagaacaggtccagcaattccagtggattaaagcctaagaagaagaacaagccgaagaacaggtccagcaattccagtggagcaaagcctaagaagaacaagccaaagaagaggtccagcaattccagtagagcaaagcctaagaagaacaagccaaagaagaggtccagcaattccagtagagcaaagcctaagaagaacaagccaaagaacaggtccagcaattccagtagaggaaagcctaagaagaacaagccaaagaagaggtccagcaattccagtggagcaaagcctaagaagaacaagccaaagaagaggtccagcaattccagtggagcaaagcctaagaagaacaagccgaagaacaggtccagcaattccagtagagcaaagcctaagaagaacaagccaaagaagaggtccagcaattccagtggaggaaagcctaagaagaacaagccaaagaagaggtccagcaattccagtggagcaaagcctaagaagaacaagccaaagaagaggtccagcaattccagtggagcaaagcctaagaagaacaagccaaagaagaggtccagcaattccagtggagcaaagcctaagaagaacaagccgaagaacaggtccagcaattctagcagagcaaagcctaagaagaagaacaagccgaagaacaggtccagcaattccagcagagcaaagcctaagaagaacaagccgaagaacaggtccagcaattccagtggattaaagcctaagaagaacaagccaaagaagaggtccagcaattccagtggagcaaagcctaagaagaacaagccgaagaacaggtccagcaattccagcagagcaaagcctaagaagaagaacaagccgaagaacaggtccagcaattccagcagagcaaagcctaagaagaacaagccgaagaacaggtccagcaattccagtggattaaagcctaagaagaacaagccaaagaagaggtccagcaattccagtggagcaaagcctaagaagaacaagccgaagaacaggtccagcaattccagcagatcaaagcctaagaagaacaagccaaagaagaggtccagcaattccagtggggcaaagcctaagaagaacaagccgaagaacaggtccagcaattccagtagagcaaagcctaagaagaacaaaccaaagaagaggtccagcaattccagtggagcaaagcctaagaagaacaagccgaagaacaggtccagcaattccagtggagcaaagcctaagaagaacaagccgaagaacaggtccagcaattccagtggagcaaagcctaagaagaagaacaagccgaagaacaggtccgggagttccagggAATCCAACGAAAGACCCCAAAGAAGACCAAAGGACGATGATGAGGATGTTTTCGAATGTACCGGAGGCAGCCAGGAGGTGATCATTGCCAAGGAAGTCGACAGCTCTCAACCCCAGGAATTCGAGATTGAAAAGGATGACCCCGTGGACATCATCTTCCATTCCCAGGGTGGAGAAAGGATCGAAATCGAGGTGGAGAAAAAATACATCTACATCCTTGGCTCCACCGGTATCAAACTGAAAACCAAGAAACTGCCGTCCTTCTGCTGGGGACTTCGAACCCTGAGACTGGTGGTGAGATTCGTCACCAACGGCTTCGACGTCTTCATCGTATCTTCCTCCGGAGAACTTCGAATCAGTGAGTTCAGAGAGCCCAAACAACGCATCTTCCGCTGCGGCTCCATCGGATTCAAGGGGAGGAAGAGTTCCAGGCTTTACTACAAAAAAAAGGGACGAGGAGGACCAAAAaagaacaagccgaagaacaagtctgggagttccagtggagcaaagcctaagaagaacaagcctaagaaaaacaagtctgggagttccagtggggcaaagcctaagaagaagaacaagcctaagaagaacaagtccgggagttccagtggagcaaggcctaagaagaacaagcctaagaagaacaagtccgggagttccggtgGCTCTAGACAGAGGAACAAGCCCAAAGGGTCACGTGGACCCAAAATCAGCAAGGGCGGTTTCAGCTCAAGATCTCATAAGGTTCCAGTCAAACCCAAAGGAAAGGCCTCAAAGAAGAAGCCCAGACAAAAAGGCTCAGATTCCAACGAAAGACCCCAAAGAAGACCAAAGGACGATGATGAGGATGTTTTCGAATGTACCGGAGGCAGCCAGGAGGTGATCATCGCCAAGGAAGTCGACAGCTCTCAACCCCAGGAATTCGAGATTGAAAAGGATGATCCCGTGGACATCGTCTTCCATTCCCAGAGTGGAGAAAGGATCGAAATCGAGGTGGAGAAAAAATACATCTACATCCTTGGCTCCACCGGTATCAAACTGAAAACCAAGAAACTGCCGTCCTTCTGCTGGGGACTTCGAACCCTGAGGCTGGTGGTGAGATTCGTCACCAACGGCTTCGACGTCTTCATAGTGTCCTCCTCAGGAGAACTTCGAATCAGTGAGTTCAGAGAGCCCAAGCAACGCATCTTCCGCTGCGGCTCCATCGGATTCAAGGGGAGGAAGAGTTCCAGGCTTTACTACAAAAAAAAGGGACGAGGAGGATCAAAGAAGAACAAGCCGAGGAACAGGTCGGGGAGTTCCAGTGGGTCAAAGCCTAAGAAGAACAAGCCGAAGAACAGGTCCGGGAGTTCCAGTGGACTGAAGCCCAAGAAGAAACCCAGAATTTCAAGTGGACTGAAGCCAAAAAAGCCGAAGAACAATTCGGGGAGTTCTAGTGGATCAAAGCATAAGAAGAACAAGCCGAAGAACAGGTCCGGGAGTTCCAGTGGATTGAAGCACAAGAAGAAACCCAGGATTTCAAGTGGACTGAAGCCAAAAAAGCCGAGGAACAAGTCGGGGAGTTCTAGTGGATCAAAGCCTAAGAAGAAGAACAAACCGAAGAACAGGTCCGGGAGTTCCAGTGGATCAAAGCCTAAGAAGAAGAACAAGCCGAGGAACAGGTCCGGGAGTTCCAGTGGAAATAAGAAACCGAAAAAGCCCAAAACTAGAGGATCATCCAGCAGTTCCAGCAATTCAAGAaagaggcctgggaagaagcctggcaagaaacctggcaagaaacctggcaagaagccGAAAGCTCCAGAAGAAGATGAGGAATTCGAGAGTGTTCCCGGCTCCGAGGTGATCATCACCGAAGTGGTTGACACCAGCGAGCCCCAAGAGTTTGTCGTCGAAAGAGGAGATCCTGTGGATATTGTGCTCCATTCCACAGATGGACAACTTCTCAA**GCTTGAGATTGAAAGCCGCTACATCTACATCCTGAGCATCTCTGGCGCCCGACTACAGACAGCCGATCTCCCGTCCTGGGCACGCAAGCTGCAATCCTTGCGAATCGTCGTCCGCTTTGTCACCTACGGCTTCAACGTCTTCCTGATACGGTCCTCCGGTGAGGTAGAAGTCCTGGAATACAGGGAGCCGGACCAGCGCGTGTTCGTCTGCGGCACCATCGGATTCGAGGCCAAGGGGAACAAGAAACAGAAGATACACTACAAGCACAAAGGAAAGGGAGGCAAGAAGTCAAGTTCTAAGCCCAGAATCCGCGTGGAAAAGACACATGAGCAGGAAACGGTAATTGAGGAACATGAAGAGGTACAGAGTCAGACCATTGGCATCGCAGCAGACACATACCAGAGGATTGAAGGAATCGCTAGCTTTGAGAGCAGTCTGAGTTTCTCCTTCGATCCAGAAGACGGCATCACTTTCCGCTTGTCTGAAGAGCAGAACGGCGATGGCAAGTCGCTGCTGTTCGTCATCCAGAGCGATTGGAGCTACATGCAGTACAACGGCCATGACCTGGGTGACAGATTCCAGACGCCAGCGGGCGTCCTAGACAGCGGCTCGAAATCTTTCACCATCAAGCTGCCGGGCTCCTCCAGCAGTGAGTTCTGGTTTGAGCTCTGGTTCCAAGGAGAGAGCAGCGCCTACCTGAGGCAAATGGTTTC**TGACACATCCTTCCGGCCCAAATACATCGATGTAGCCATCCACGTGATGAAAGTCTACCCAAATTGGATGGATATGGGGGCAGTGACGGACAGTAAGTACCAGTTCAAGCTGGAATCAGCCGAACCAGGTCTGGTGTCTATACAATCGAGCAAATCAGGAGCTGGACAGCTAGTTGCAGAGTTTGGAAGTCCGAGCAGCAAGGGTTGCAAGATCCAGAAATGCAAGGACAAGGAAGCGACTGACTGCACGGACGTGGCGCACCCGGACGACTCGACCGCCTGCGACGGACTCGGCACCTCCCGCTCCATTTGGGTCCAGTTCGCGGACGGGATCCTCCACATGGGTACGTGGGCGGGCGATCAGTTCACCGAGATCTGCAGCTACGACGCCAGCGGATGGTTGGAAGGCGCCGGCAGCTCCCAGAAACTGGCCATCGGAACGCGTGGTAGCGGCGAATGGCAGGCATTCGGATAA

>Sfp9 (g820.t1 + unigene11005)

ATGAGGAACAGCCCGGGCGTGGTCCCGGTGCGTTTTTGCGTCACTCTGGTACTGTTTGCAGTGGTTCTCGGGGTCCTCTTGCCTCTATGTAGTGGTCAGCAACCGCGCGGTGACGAACCGTTTGCCCCTCCAAAGGAATCACCAGAAATCCAGAAAGTGGAAGATCAGTTAGTAGACGAGGAAGCAGCACAGGAAAAACTGAAGAAAATCCGAAATCGTGCCTTTGGTGCCGGCTACCTGGCCATGGCACCCAAGATCTTGTGTGCCGGCAGCCAGGAGAAAGTCTTCATCACATTTGTCAACTTCTCGCAGCCAGTGGACGTCATGTTTGCCGTCATGGAGAATGAAGAGACTTCTCTGGTCGTCACTCAGCTTAAGGTTTTCAAAACTCCTTGTGGCTGTGTAGAGATCGATCTTCCAGTCATTGACAAGCCCAGGATGGTTGTCTCACTGGTCATGTATGCCAAGCGGACCCTGATGCAGTGTGAGGAGTTTGAGATAGTGGACAGTATCAAGGTCTACCTGGATGCCTGCAACTCCGAGACCTTCATTGAGACGGACAAACCCATCTATAAACCAGGACAAGAAGTGCAATTCCGAGTCCTGACATTGCTGTCTGATCTGAGGCCTGACCTGAgtgatGTGTCCAAAATTTGGATTGAGTCTCCAGCTGGTATCCACATGGCCCAGTGGCTAGCGGTCAAGACGATGGACGGTCTGATTGACTTGTCCATGCCCATGTCTACAGACCCACCAATGGGAGAATGGAAGATAAAGGTCCGCCATCACGATCGCGAATTCTCGCAGAGCTTCACGGTTGGAGAATACGTGCTTCCCAAGTTTGAAGTCTTGATCCTAGGACCAGACTATGTGGTGGCCCCTGCTGGAAAGAAAGATGTCCTTGTTTGTGGCAAATACACTCATGGCCAGCCTGTTCGTGGCTCCATCAAGTTGCATGTCTCTGTTTCAACCATTCCAGATGCAGAAATTGATATGTTTGAGGATACAGATGCCAATGGCTGTCATGTCTTTGAGGTTGACTTGGCAGAAATTCCTTGGAAAACACTCCGCTACATCAACCCCAGCAGAACTAAACTGGTCATCAAAGCAGAATTTGAAGAAGCTGCAACACGTACTGTGATTGAGAAAACTATCGATGATATCGTGATTACTAGGAAGCCGTTTGAGCTGAAGTTTTCCGTTCCGTCAACCTTCAAGCCTGGTCTTCCATTCTCAGGAATGCTTCTCTTTACTGACCCTAGTGGTAAGCCGTTGTCTGGAGAGAGTGAGATCATAGCCTCAGGAGGCAAGTCTGAGGATCTGTACAGGGAGATGGTCATTAGTAACGAGAAAGGGATAGCTTTCTTCACCATCGAGGACGTGCCTCATGATGTCGAATTCATCAATCTTAGGGCTGAGTCACAGGGTTCCAACTCAAGAAACAGCCCCAAGGCCTACAGCAACGTTCAGCCTCAATACTCCCCCTCCAAGAGCTACATCCACATTGACCCGATCAACGAGAGAGCAATGATCAATTCCTACCAGAGCCTTACCATCCACATGACCAGTCAGGAGCCTGAATACAACGGGGTCTACCTCCACACTGTGATGATGGCCCGAGGCAATATTCTGCTGGATGTGGAGTCCATAATTCCACCTGAGGAGATTGACGCATTCCGTCGACCTGGCCAGTATGGGATCTATCCTGTCAACACAGACGAAATGGGCATGAAAGAATACACTTACAGCATGCATATGGTCGCCAGCGATGTCCCTGTTCATATCCTGGAGAAACACAAAGTAAAGACGACGCGCCGTCGGTTCAAGATTTCCTACGACATGTCCCCGTCAGTCACGGTGATGGTGTACTACATCAGAGGCAATGGGGAAGTGGTGGCCGATACCGTGGTTATACCCGTAGAGGAGGCCTTCCAAAACCAGGTTGATGTTAACTTTGCTGAGGAAACCAAACAACCTGGTGAGCACACTACTCTCAACATTCTGGCCAAGCCCTCGTCTCTTTGTGCCTACGGGGTCGTGGACAAAAGCGTGCATCTGCTGGGGGGCGATAACCGTATCACAAAAGAAAAGGTTTTCAAGGCTCTTGAAGACATCCAGTTGTCCGCCGAGGGGGGTTTCGCTGAGCCTCAGAGCAAGAGGTGTGGGGATGGGGGTTGGGGTGGTGGTGGACCCATGCCGGTGTTTGGCGGCATGCGAGGGATGCCTAGTCCAAGTCCCAACCTCAAGGATGCCTCGCAGTCTTTCAAGGATCTGGGTGTAGTGTACTTGACAAATCTTCAAGTTGAAACAGCACCTTGCCCAAAAGTGCATCCCTGGCTTTATCGTAGACCTGAAGTGATGGAAGATGGAATGGTGGTTCCCTTGGCAATGCCCATGTTAGAGATGGCGGAGGGACCACCCATGGTTGCTGAGGCTGAAGTGGCAGTGAGTGCTGTGGAGGGGGGCGGGGCACCAGACGTCCGTTCCTACTTCCCAGAAACCTGGTTGTACGACCTGATACGAGTCAACTCTGATGGTTCAGCCAATATACCCATCCAAGTGCCCCACACCATCACCGAGTGGATTGGCCATGGGTTCTGCACCTCCACACGATTCGGTGCTGGGGTCTCAGAGCTGACTAGACTCACTGCATTTCAGCCATTCTTTGTGGATATGACGCTGCCGTACTCAGTCATTCGCAATGAGTACGTACCCGTGACAGTGGTAGTCTTCAACTATGTCACCAAATGCTTAGTGGTAAAACTGACCCTTCAACCGTCCGATGATTTTGAAGTAGAGGAGCAGAATCGCCGAGAACATATCTGTGTGTGTGGCGGCCAGTCGGTCCCATCGTCTTTCTACATCAAAGCTTCAACCATCGGCTCCATTCCAATAGAAGTGCATGCGGTGTCAGTGGAAGACAGTGATAGTTGGTGCCATGGCCAGGACATGGATACCAGTCAAAATGGATTCTCTGATGCCATCCGAAAGCCGCTACTGATCAAGCCAGAAGGAGTTGAGACTGAGCAGGTTTTCAGTGCCTACTTTTGTCCAGATGATTATGAAGGAGGGAAATATGAAGAGGTTATTTCCCTTCAAGACCTACCAGACAACTACGTGAATGGCTCAGAGAGGGGTATCGTTACAGTCACAGGGGACATGTTGGGCCCTACTATTGACAACCTGGATCACCTTCTACGAATCCCAACCGGTTGCGGTGAACAGAATATGATTGGATTTGTGCCCAATATTTACATCCTACACTACCTCAAAGGGATCAACAAGCTTAATCCAGACATTGAGGCTAAGGCCAAAGAGAACATGGAGATTGGCTACCAGCGTGAGCTGAATTATCGCCACCCCGACGGCTCCTACTCAGCCTTTGGTGATCGCGACCCGTCCGGGAGCACTTGGCTGACAGCGTTTGTCGTGCGTTCCTTCTCCCAAGCTCGGCATCACATCTATGTGGATCAGCAGGATTTGGATAAGAGCACGGATTGGCTGCTTAGACAACAGCGGGAATCCGATGGGTGCTTTGAATCTCACGGCAGGGTCATTCACAAGGATATGATGGGCAGCGTAAACGATGTGACGACATTGACTGCGTATGTGGTGATCTCCCTTATTGAGGCAGAAGTGCCATATGATGACCCAATCATTCAGAGAGCTGTTGGATGCCTGGATGCAAAGATTGACATTTCCTCAGCTGACATGTACACATTAGCCATAGCCGGATATGCCTTCATTCTGTCTGGCTTTCCCCACAAAGATGACCTGATGAATAGGCTAGCAATGCTGGCTGTGGATTCGGATGATGGGCTGAGACATTGGGAGGGTCGTCCTGAGCCAGTACCAGCCGGTGACCGCCGCCCATATCTCCATCATCAAGCATCTTCCCAACACATCGAGATCACATCTTACATCCTC**CTCACCTACACCCGAGCTTACGCCAAGACACAGGCCCTGTTGTACGGAAACCCTGTGGCACGGTGGATCATCGGGCAGCGCAACGCCAACGGAGGATTTGCCTCCACACAGGATACAGTAATGGCTCTTCAAGCTCTTGCTGAGTACGGCATGATGGCGTACGTTGGCGGCCATCAAAACGTCAAGCTACAGATCAAGTTCTCCTGTGAGCCCCGTACTCATTGGAAGTATGTCCGTGATCACAACCGTCTCTTGCTGCAGACCCTACCTATACCCCAGGTACCTGTGCAAGTCAAGATGAGTGCTGAGGGTCCAGGGTGTGCCATGACACAGGTGATAGTCACCTACAATGTGATTccagaagagccagaagagccagaagagccaCCATTTGAAATCAGCTTTGACTACGACGAGAATAAAGATAACAACCCATCTCCTTGCTCCACATACAACATGCACGTCTGTGCACGGTACAATGGCGAAGATGAATTTTCCAACATGGCCGTCGTCCAAGTGCGCATGGTGTCAGGCTTTGAGGCTGATTCTAATGCTATCCGTATGCTGAGGTCGTTGCCCTCTCCCAACCTCAAGAGGATCGAGGAAGAAGGCAAAGACATCTTCTTCTACTTTGAACAACTTGGCCATGAGGATACCTGTGTGGATTTTATTGCCAGACGAGACATCTTTGTGAAAGCTCCTCGGGATGGGGTCATCACTGTCTTTGACTACTACGAGAAAGCTTTATCATCCTCCCGTCTGTACAACTTCAAGTGCCAAGGCATTGCCTAG**

>Agib-Sfp10like (g1515.t1, 30 bp longer)

atgcaaagaagaagtgtccaccactactcctgcggcaacaacaacgaaagttgtgaccacaaccactcagacgtccacgtccacgacggcaggatactgtatggagccaatggacggagaccaagcaccactcaaaccttccgtaatgtgctggactcttctggtcagcca**ctggttcaggagacgaccctgaatggtgatcgacctgtgactctcatcttggcctctcccgtgaccggcattaaagaactgcgacttgagatcctgtccattggggacagcaacgagggaagcttgcgtgttgatttcctgggatgcaaagaagaagtgtccaccactactcctgcggcaacaacaacgaaagttgtgaccacaaccactcagacgtccacgtccacgacggcaggatactgtatggagccaatggacggagaccaaggtcttgagggtggccgctctaagagcccagactctgaagaaatccgattcatcctgtcggtacgggatagcaccactcaaaccttccgtgatgtgctggactcttctggtcagccactggttcaggagacgaccctgaatggtgatcgacctgtgactctcatcttggcctctcccgtgaccggcattaaagaactgcgacttgagatcctgtccattggggacagcaacgagggaagcttgcgtgttgatttcctgggatgcaaagaagaagtgtctaccactactcctgcggcaacaacaacgaaagttgtgaccacaaccactcagacgtccacgtccacgacggcaggatactgtatggagccaatggacggagaccaaggtcttgagggtggccgctctaagagcccagactctgaaggtcaatcaagtgatatcaacgccgaagagccctggacattcaagctacaggacaatccc**gaggacaaccgccaagaaaaccccacattggacgtccagttcaatacccgggttgaattgcatgctttgaggctgcagggaaataccgacgacagtccagaaatccgattcatcctgtcggtacgggatagcaccactcaaaccttccgtgatgtgctggactcttctggtcagccactggttcaggagacgaccctgaatggtgatcgacctgtgactctcatcttggcctctcccgtgaccggcattaaagaactgcgacttgagatcctgtccattggggacagcaacgagggaagcttgcgtgttgatttcctgggatgcaaagaagaagtgtctaccactactcctgcggcaacaacaacgaaagttgtgaccacaaccactcagacgtccacgtccacgacggcaggatactgtatggagccaatggacggagaccaaggtcttgagggtggccgctctaagagcccagactctgaagaaatccgattcatcctgtcggtacgggatagcaccactcaaaccttccgtgatgtgctggactcttctggtcagccactggttcaggagacgaccctgaatggtgatcgacctgtgactctcatcttggcctctcccgtgaccggcattaaagaactgcgacttgagatcctgtccattggggacagcaacgagggaagcttgcgtgttgatttcctgggatgcaaagaagaagtgtctaccactactcctgcggcaacaacaacgaaagttgtgaccacaaccactcagacgtccacgtccacgacggcaggatactgtatggagccaatggacggagaccaaggtcttgagggtggccgctctaagagcccagactctgaagGACGTACACGGCCGCCCAGCACAACAACTCCACAATGCGAGGAAGGGAC**GACGATGGAACTGGACGAATGCCGTTCTTGTGACTGCTTCAACGGGACCTACTCTTGCTACTATGATTGCCATAAGCGACCTGATAGCTGTGCAGTGGGTGAACAGTTGGTTTCCTTCCAAAACAAGTGCTGCGAATGCGTGTCGATCACAACAACTCTCACATCGATGTTAACTACCCTTGAATGCTTGGATCCATTCGTGGTTGGTGAGCCTACCTGCTGTCAGTACATGGACAAGTGTGAGATTGACCCCATATTTTCTGGAGCCGAGAACTGCAACGCCTGTAGGACACCGCTCGTGTTCAACGGTACCGACTGCGTGTTCCCGAATGAATGCCTATGCAAAGACAAAGAGGGCTTCCATAAGCCTGGAGACAATTGGGAAAACCCGAGCAAAAATTGCAGCTACTGTACCTGCTTCCGCAACCAAATCGACTGTCACGAGACGCTATGTAACAACAAGCTAGACTGTTCTGAGGATGACTACATTTACCTCCCTGGAGATTGTTGCGCAACGTGCAAAGGTGAACAGAAAATAACAACTACCAAGAAGCCACTGGAGCTGCCCTGCTACCATGAGCACTCTGGCAGGTGGTATAATCGGGGAGAACATTTCGCGCAGGGGGCATGTGAAGAATGTATATGTCTTGACGAAGTTATTTGCACCATCAGCAAATGCCATCTGACCGAAGACGATTGTGCGGAAGGTGAAATCGTGATGGCTACCGAGGACATGTGTTGCGAATGCAGAGCAGTGCAGACAACCACAGTAATTCCAACTACAACTCTACCAGCTTGTACTGATCCCTACGTCTACCGTGAGAGCTGCGAGTGTCATGTCATGTGCTCCACACTGGGAGAGGACTGCACGGATGTTAAATGCGAAAAGGGGTGCTTCTGTCCAGAAGGCAAGCTGATGAACGATAAAGAATGCATTCCAGAACACCAGTGCCCATGCACAGATATACTTGGAATCAAGAGACAGTTTGGCGAAATGTGGTCCCAAAGCGACTGTGAGAGATGTATTTGCGAAGAAGACATGGCCATCAACTGCACAAAGATTTGCACTTTGGACTGCCAGGAGGATGAAGTCCTGATCGAGCCTGATGGAAGCATGTGTTGCTACTGTGAGAAAATCCCAACAACTACTGTTTACCCAACGACGATGCTTCTTCCAAGCACAAGTACTGCCTCCCCAAGCGGATGTCTTGGTTGCTATGACGAGAAATCGGAGACGTGTCACGAGCCCGAAACGTCTTGGCGGGATGACCCTTGCACCACCTGTGAATGTCAGTACAAGAATGAGTTCGCCTTGACCTGCAAGGAAACCCAGTGCGGGGAGGACTTGGAGTGCAAAGAGGGGCATGTCCTGATCAAAGACGACGGCGACTGCTGCTACCACTGCGTGCCCGATATCTGCGTGGGGGATTTCAACTGCAACTCCACCCACTGCATCCCTAATAAGTGGCAGTGCGATGGTTCCGTGGATTGTGACAATGGATATGACGAAGAAAATTGTCCTCTGCCGACGACACCGCCTCCGCCTCCTCCATCTTGTGCTTCGTCCGAGGAAGTAACAGTGTGCAAAGACTGTCGGGAAAGAGCGTGTCAGGACTTCGCATGCTACGAGATGCCACAAGACCTGTGTTGTGAATGCAAACAGGGCACGGTATTCAA**TGGCACGACATGTGTCAAACCAAAAGAGTGCAAGTGCCTCGACGAGAATGGCAATATTCGCTTGCCGTTTGAAACTTGGGAAACTGAAGAATGCGAAGAGTGTAAGTGCCAGTTCAATAGAATTACTTGCTACCCGGCTGCTACATGTCAAACAACAACGCCTGAGCCCAGGACTATGCCTCCTCAACCTCGATACTGTGATGAGACGTGTCTATGTCAGCTTGACTGTGACGGAGAGTTTGTAGATGAAAAGTGCTCGTTCGTTGTTCCCAATGAGTGCAACGACACGTGCCTATGCGGACCGGGATCTGAGAAAGACAAAGTGACAGGGCGGTCGTGTGTAATTCGACCAACACCAGAGGAATGTGAGAAAACTACTACAGCTGAAGTTTCAACCACTACTCCAGCAGCAACAACCAGACGTAAATATTTCTCCCCTTTTAACGTTTAG

**>Agib-Sfp12** (g1518.t1 modified) – orange part according to sanger seq

**AGGAGGAGTCCGGAAGTCTGCGTGTTGATTTCCTGGGTTGCNTGGAAGAGATTACAACCTCNACTGCAGCGNCAACGACAACTGGAGAGATGTGCAATGGCTCTATGGTTTGGACTGACTGTGCCTGTGAGATCAATTGCCAAGCTATGGCTTCAAGGGAACAGCCAGTCTACGAATGTGACAACTCGACCTGCGTGCCCGGATGCATCTGCCCCGTCGGGATGCTGGAACAGAATACGAAATGTGTCCAGCCTGAGGAGTGTCCATGCTACTACAATGGGACTTTCTATGCGTACGGTGACACAGTGGTTATCAACGACTGCTACATTGGCATCTGCGAAAAGACAACAGAAAGAGTGGAAGACCCTCTCAGCATTATTCCTAACTGCAACATTGAAGAATGCTCAGAAGGAACAATGCTTCGAGATGTTCCCGGAGAGTGTTGCTCCTGTGTGCCAGAATGCCAAGACGGAATGGAGTACAACGAATGTGCATGCAATCGTAGCTGTGAGTACCCCGAGATGACATGCTCAGACAACTGCGTGCCTGGGTGCAGCTGTTCCGAAAACATGTTTTGGAATGGAACCCAGTGCGTCGACCACTGCCCTTGTCTGTACATGGATCGCCTGAATGAGAAAGTTTGGACACAGGATAACTGTACAATGTGCAAGTGGAAGGACGTTGATAACTGTCTGGTGGACTGCCATGAATTTTGTGAAATCAAAGATGCTTGTGGCGAAGAGATGGACCTAGTCAACGAGGACCCTGACGATATGATTTGCTGCCACTGCGTTCCAAAAGAACGGTGCAAGCACGACGAAGATCCCGTCGATGTATACAGATCCGTTGGGGAGGTCTGGATGCCCAATGTGTGCGAGGAATGTGAGTGTTCACAAAGTGGCAATGTCATTTGTCGGGAGACTGTGTGTCAAGATCCACCTTGCCAACTTGGATACGAGCCACACCAGGTCGAGGGCGAATGCTGTGCTCAGTGTAAACACATTCCGCAGCCAACAACTCCGGAACCAGCAACGACAACTGTATCACTTGACTGCCCAGAAACGTGCTACATAGGTGAACCGCTGTCCTGTGAGCAACAAGAGGCCTTCACCAGTAGAGCCAACACTGCACCATTTGTGGAGCAGTCCGAGTGCAGTCCAATGTTTAGTGACATGTTCAATGTGCAGCCAAACTGCACCTGCAAGGAGGCATTCATCAGAGATGTCACAGGAAGCGAGGTGGAGGAACAACTTGGCTACACATTCAATTCCGGAATGTGCATTCTACTGGACCCTTGTGAAGAAG**ACTGTGAGGACATATGTCACGTGAACTGCAACAAGTCACGAGCAGAATATGAACTGTTCTACAATACAACCACATGCAAGTCTGAATTTGCCAAGTTCTTCAATGCTTCCACCTTCTGCCTGTGCAAGGAAGGTTATGTGAAGGACGAAGAGGGTGAAGCTGTTGAACAGCTAGGATTCCAGTACAATACCTCCATGTGCATCGAAGTAGAGAGCTGCAAACCAGACTGTGTGCACGATAACCACTTCTTATACGAGGGGGAATCAGTAATGCAAGATTGTCAAATATGCGAGTGTCGGAGAAGTTCAACCATACCACCAGAGAGTACTGCTCCTTCAACAATTGCTGAATACAGCATGGTTTGCTATCCTCTCAATGAGTGCACAACAGAGTACTGTTTGGAGCCCATCGACAGCAAATCTGGACTCCTCTCCGATATCACAGGCGGCGGCTCAGTTTCACCAGACAAGGCCAATGGTTATGTTCAACTGACAGACCTACCCATTACTTCAAAACCAGGAGAGGAGCCTTCCATGCTGGACGCTAGATTTAGCAGAGCGATTGATATCAAAGCCATCAGGTTCAGGCTACTGTCAACAGTATCTTCCACCACTCAAACAAGCACTGAAGAGAAATACACACTTCTTACAAGCAATCTTGCCTTACATGGTAAGAAACGAGGAAATGAGAAGTTTTCACCCCTTCTGGAAGCAGGCACAGCACAAGACCAAATAAAGATTTTTGAAGTCACCGTAGACACCAATTTGCCTGAAAAGCTGCTGTTTCCGGGTGATGACAGAGCTCTGCAGGGCATTGAGGAGTTGCGTATCCACTTCCGAAGTGTAACTGGTGGTGAATCAGCAAAACTGCAAGTGGACATTCTAGGATGTGCCAATGATtactgtttagagccaatggacggtgaaaggggacttgaACCTGAAGTAAAGGCAGTCGGAGACCTCACAGTCGATAGTCAGACCTCGTACTTGACCATCACCAAGTTGCCGATCGACCCAAGCTCAAGTGATATCCCCAGCGTAGAGTTCCTGTTCCGTCAGCCAATCAAGTTGACGGCAGTAGTCCTGACCTCGCGTTCTCCTCAAGCAACAAGTGCACCCACTGGCCAGCCAGCGGCTAGCACAACCACACCCATATCTGCTGCAGGGGAGCAAACGACTGATGTCGTTTTCAGTGTGTCTACCAAGAAACCTGGCGATGAGAACCTCACACCACTGATAGACGACAACACCAACCAGCCCAAGTTGATAACTGTCCGTCTGGAAGGAAGCAACCCGGAAATCAAATACTTGCCGATAGGTGAAGCTACACTTGAAGGGGTTACTGAAGTGGCCGTACAAATCCAGTCCGTCAGTGATGACGAAGCAACAACCTTTGAGTTGCACATCCTGGGTTGCACGGAAGAATACACGACTCAGCCGACGACAAGAACCACCAGAGTCACCACCACTGTGACAACCACGACTCCTCCCTCTTCAACAACTCAAGGGTACTGTCTGGATCCCATGGACAACGACTCCGGACTGCTGTCCGATGTCACTGGCAGAGGTTCCGTGTTGACCGACGAATCCAGACGTGACATCCAACTGACAGACCTACCCATCACTCCGGGAGCAGGCCAGTCTTCCACTCTGGACAGTGAATTCAACAGACGGGTTAATGTCAGAGCTATCAGGTTCAGGTTGCAGCCCACAGTATCTTCCACCACTCCGGCGGGCGCTGCTGAAGAAATCACTCCTCTTCGAGCTGATCTGGTCTTGTCGGTTTTGAAACCGGGAGACACTGACTTCACGCCCGTTTTGGATGGGGAAACTAACCAAGAGAAGGTTTTCTCAGTCACCCTTGACAGCAACTTGCCCGAAAGACTGCTGCTTCCGATCGACGACCCAGCTCTGCAGGGCGTTGAGCAGTTGCGTATCGAGTTCCGAAGTGTAACTGGTGGTGAATCAGCAAGACTGCAAGTGGACATTCTGGGATGTGCCGAAGAGTACACAACAACTGAAATGACCACCAAAGTCACCACAGTTACAACACCGACGACTGTCAGCGAAGAAACAACAAGCTCGCAAACCACGACGTCAATCATGTCGACTACACCAGgttactgcctagagccaatggacggtgaaaagggacttgaACCTGATGTAAAGGCAGTCGGAGACCTCACAGTCGATAGTCAGACCTCGTACTTGACCATCACCAAGTTGCCGATCGACCCAAGCTCAAGTGATATCCCCAGCGTAGAGTTCCTGTTCCGTCAGCCAATCAAGTTGACGGCAGTAGTCCTGACCTCGCGTTCTCCTCAAGCAACAAGTGCACCCACTGGCCAGCCAGCGGCTAGCACAACCACACCCATATCTGCTGCAGGGGAGCAAACGACTGATGTCGTTTTCAGTGTGTCTACCAAGAAACCTGGCGATGAGAACCTCACACCACTGATAGACGACAACACCAACCAGCCCAAGTTGATAACTGTCCGTCTGGAAGGAAGCAACCCGGAAATCAAATACTTGCCGATAGATGAAGCTACACTTGAAGGGGTTACTGAAGTGGCCGTACAAATCCAGTCCGTCAGTGATGACGAAGCAACAACCTTTGAGTTGCACATCCTGGGTTGCACGGAAGAATACACGACTCAGCCGACGACAAGAACCACCAGAGTCACCACCACTGTGACAACCACGACTCCTCCCTCTTCAACAACTCAAGGGTACTGTCTGGATCCCATGGACAACGACTCCGGACTGCTGTCCGATGTCACTGGCAGAGGTTCCGTGTTGACCGACGAATCCAGACGTGACATCCAACTGACAGACCTACCCATCACTCCGGGAGCAGGCCAGTCTTCCACTCTGGACAGTGAATTCAACAGACGGGTTAATGTCAGAGCTATCAGGTTCAGGTTGCAGCCCACAGTATCTTCCACCACTCCGGCGGGCGCTGCTGAAGAAATCACTCCTCTTCGAGCTGATCTGGTCTTGTCGGTTTTGAAACCGGGAGACACTGACTTCACGCCCGTTTTGGATGGGGAAACTAACCAAGAGAAGGTTTTCTCAGTCACCCTTGACAGCAACTTGCCCGAAAGACTGCTGCTTCCGATCGACGACCCAGCTCTGCAGGGCGTTGAGCAGTTGCGTATCGAGTTCCGAAGTGTAACTGGTGGTGAATCAGCAAGACTGCAAGTGGACATTCTGGGATGTGCCGAAGAGTACACAACAACTGAAATGACCACCAAAGTCACCACAGTTACAACACCGACGACTGTCAGCGAAGAAACAACAAGCTCGCAAACCACGACGTCAATCATGTCGACTACACCAGgttactgcctagagccaatggacggtgaaaagggacttgaACCTGATGTAAAGGCAGTCGGAGACCTCACAGTCGATAGTCAGACCTCGTACTTGACCATCACCAAGTTGCCGATCGACCCAAGCTCAAGTGATATCCCCAGCGTAGAGTTCCTGTTCCGTCAGCCAATCAAGTTGACGGCAGTAGTCCTGACCTCGCGTTCTCCTCAAGCAACAAGTGCACCCACTGGCCAGCCAGCGGCTAGCACAACCACACCCATATCTGCTGCAGGGGAGCAAACGACTGATGTCGTTTTCAGTGTGTCTACCAAGAAACCTGGCGATGAGAACCTCACACCACTGATAGACGACAACACCAACCAGCCCAAGTTGATAACTGTCCGTCTGGAAGGAAGCAACCCGGAAATCAAATACTTGCCGATAGATGAAGCTACACTTGAAGGGGTTACTGAAGTGGCCGTACAAATCCAGTCCGTCAGTGATGACGAAGCAACAACCTTTGAGTTGCACATCCTGGGTTGCACGGAAGAATACACGACTCAGCCGACGACAAGAACCACCAGAGTCACCACCACTGTGACAACCACGACTCCTCCCTCTTCAACAACTCAAGGGTACTGTCTGGATCCCATGGACAACGACTCCGGACTGCTGTCCGATGTCACTGGCAGAGGTTCCGTGTTGACCGACGAATCCAGACGTGACATCCAACTGACAGACCTACCCATCACTCCGGGAGCAGGCCAGTCTTCCACTCTGGACAGTGAATTCAACAGACGGGTTAATGTCAGAGCTATCAGGTTCAGGTTGCAGCCCACAGTATCTTCCACCACTCCGGCGGGCGCTGCTGAAGAAATCACTCCTCTTCGAGCTGATCTGGTCTTGTCGGTTTTGAAACCGGGAGACACTGACTTCACGCCCGTTTTGGATGGGGAAACTAACCAAGAGAAGGTTTTCTCAGTCACCCTTGACAGCAACTTGCCCGAAAGACTGCTGCTTCCGATCGACGACCCAGCTCTGCAGGGCGTTGAGCAGTTGCGTATCGAGTTCCGAAGTGTAACTGGTGGTGAATCAGCAAGACTGCAAGTGGACATTCTGGGATGTGCCGAAGAGTACACAACAACTGAAATGACCACCAAAGTCACCACAGTTACAACACCGACGACTGTCAGCGAAGAAACAACAAGCTCGCAAACCACGACGTCAATCATGTCGACTACACCAGgttactgcctagagccaatggacggtgaaaagggacttgaACCTGATGTAAAGGCAGTCGGAGACCTCACAGTCGATAGTCAGACCTCGTACTTGACCATCACCAAGTTGCCGATCGACCCAAGCTCAAGTGATATCCCCAGCGTAGAGTTCCTGTTCCGTCAGCCAATCAAGTTGACGGCAGTAGTCCTGACCTCGCGTTCTCCTCAAGCAACAAGTGCACCCACTGGCCAGCCAGCGGCTAGCACAACCACACCCATATCTGCTGCAGGGGAGCAAACGACTGATGTCGTTTTCAGTGTGTCTACCAAGAAACCTGGCGATGAGAACCTCACACCACTGATAGACGACAACACCAACCAGCCCAAGTTGATAACTGTCCGTCTGGAAGGAAGCAACCCGGAAATCAAATACTTGCCGATAGATGAAGCTACACTTGAAGGGGTTACTGAAGTGGCCGTACAAATCCAGTCCGTCAGTGATGACGAAGCAACAACCTTTGAGTTGCACATCCTGGGTTGCACGGAAGAATACACGACTCAGCCGACGACAAGAACCACCAGAGTCACCACCACTGTGACAACCACGACTCCTCCCTCTTCAACAACTCAAGGGTACTGTCTGGATCCCATGGACAACGACTCCGGACTGCTGTCCGATGTCACTGGCAGAGGTTCCGTGTTGACCGACGAATCCAGACGTGACATCCAACTGACAGACCTACCCATCACTCCGGGAGCAGGCCAGTCTTCCACTCTGGACAGTGAATTCAACAGACGGGTTAATGTCAGAGCTATCAGGTTCAGGTTGCAGCCCACAGTATCTTCCACCACTCCGGCGGGCGCTGCTGAAGAAATCACTCCTCTTCGAGCTGATCTGGTCTTGTCGGTTTTGAAACCGGGAGACACTGACTTCACGCCCGTTTTGGATGGGGAAACTAACCAAGAGAAGGTTTTCTCAGTCACCCTTGACAGCAACTTGCCCGAAAGACTGCTGCTTCCGATCGACGACCCAGCTCTGCAGGGCGTTGAGCAGTTGCGTATCGAGTTCCGAAGTGTAACTGGTGGTGAATCAGCAAGACTGCAAGTGGACATTCTGGGATGTGCCGAAGAGTACACAACAACTGAAATGACCACCAAAGTCACCACAGTTACAACACCGACGACTGTCAGCGAAGAAACAACAAGCTCGCAAACCACGACGTCAATCATGTCGACTACACCAGgttactgcctagagccaatggacggtgaaaagggacttgaACCTGATGTAAAGGCAGTCGGAGACCTCACAGTCGATAGTCAGACCTCGTACTTGACCATCACCAAGTTGCCGATCGACCCAAGCTCAAGTGATATCCCCAGCGTAGAGTTCCTGTTCCGTCAGCCAATCAAGTTGACGGCAGTAGTCCTGACCTCGCGTTCTCCTCAAGCAACAAGTGCACCCACTGGCCAGCCAGCGGCTAGCACAACCACACCCATATCTGCTGCAGGGGAGCAAACGACTGATGTCGTTTTCAGTGTGTCTACCAAGAAACCTGGCGATGAGAACCTCACACCACTGATAGACGACAACACCAACCAGCCCAAGTTGATAACTGTCCGTCTGGAAGGAAGCAACCCGGAAATCAAATACTTGCCGATAGATGAAGCTACACTTGAAGGGGTTACTGAAGTGGCCGTACAAATCCAGTCCGTCAGTGATGACGAAGCAACAACCTTTGAGTTGCACATCCTGGGTTGCACGGAAGAATACACGACTCAGCCGACGACAAGAACCACCAGAGTCACCACCACTGTGACAACCACGACTCCTCCCTCTTCAACAACTCAAGGGTACTGTCTGGATCCCATGGACAACGACTCCGGACTGCTGTCCGATGTCACTGGCAGAGGTTCCGTGTTGACCGACGAATCCAGACGTGACATCCAACTGACAGACCTACCCATCACTCCGGGAGCAGGCCAGTCTTCCACTCTGGACAGTGAATTCAACAGACGGGTTAATGTCAGAGCTATCAGGTTCAGGTTGCAGCCCACAGTATCTTCCACCACTCCGGCGGGCGCTGCTGAAGAAATCACTCCTCTTCGAGCTGATCTGGTCTTGTCGGTTTTGAAACCGGGAGACACTGACTTCACGCCCGTTTTGGATGGGGAAACTAACCAAGAGAAGGTTTTCTCAGTCACCCTTGACAGCAACTTGCCCGAAAGACTGCTGCTTCCGATCGACGACCCAGCTCTGCAGGGCGTTGAGCAGTTGCGTATCGAGTTCCGAAGTGTAACTGGTGGTGAATCAGCAAGACTGCAAGTGGACATTCTGGGATGTGCCGAAGAGTACACAACAACTGAAATGACCACCAAAGTCACCACAGTTACAACACCGACGACTGTCAGCGAAGAAACAACAAGCTCGCAAACCACGACGTCAATCATGTCGACTACACCAGgttactgcctagagccaatggacggtgaaaagggacttgaACCTGATGTAAAGGCAGTCGGAGACCTCACAGTCGATAGTCAGACCTCGTACTTGACCATCACCAAGTTGCCGATCGACCCAAGCTCAAGTGATATCCCCAGCGTAGAGTTCCTGTTCCGTCAGCCAATCAAGTTGACGGCAGTAGTCCTGACCTCGCGTTCTCCTCAAGCAACAAGTGCACCCACTGGCCAGCCAGCGGCTAGCACAACCACACCCATATCTGCTGCAGGGGAGCAAACGACTGATGTCGTTTTCAGTGTGTCTACCAAGAAACCTGGCGATGAGAACCTCACACCACTGATAGACGACAACACCAACCAGCCCAAGTTGATAACTGTCCGTCTGGAAGGAAGCAACCCGGAAATCAAATACTTGCCGATAGATGAAGCTACACTTGAAGGGGTTACTGAAGTGGCCGTACAAATCCAGTCCGTCAGTGATGACGAAGCAACAACCTTTGAGTTGCACATCCTGGGTTGCACGGAAGAATACACGACTCAGCCGACGACAAGAACCACCAGAGTCACCACCACTGTGACAACCACGACTCCTCCCTCTTCAACAACTCAAGGGTACTGTCTGGATCCCATGGACAACGACTCCGGACTGCTGTCCGATGTCACTGGCAGAGGTTCCGTGTTGACCGACGAATCCAGACGTGACATCCAACTGACAGACCTACCCATCACTCCGGGAGCAGGCCAGTCTTCCACTCTGGACAGTGAATTCAACAGACGGGTTAATGTCAGAGCTATCAGGTTCAGGTTGCAGCCCACAGTATCTTCCACCACTCCGGCGGGCGCTGCTGAAGAAATCACTCCTCTTCGAGCTGATCTGGTCTTGTCGGTTTTGAAACCGGGAGACACTGACTTCACGCCCGTTTTGGATGGGGAAACTAACCAAGAGAAGGTTTTCTCAGTCACCCTTGACAGCAACTTGCCCGAAAGACTGCTGCTTCCGATCGACGACCCAGCTCTGCAGGGCGTTGAGCAGTTGCGTATCGAGTTCCGAAGTGTAACTGGTGGTGAATCAGCAAGACTGCAAGTGGACATTCTGGGATGTGCCGAAGAGTACACAACAACTGAAATGACCACCAAAGTCACCACAGTTACAACACCGACGACTGTCAGCGAAGAAACAACAAGCTCGCAAACCACGACGTCAATCATGTCGACTACACCAGgttactgcctagagccaatggacggtgaaaagggacttgaACCTGATGTAAAGGCAGTCGGAGACCTCACAGTCGATAGTCAGACCTCGTACTTGACCATCACCAAGTTGCCGATCGACCCAAGCTCAAGTGATATCCCCAGCGTAGAGTTCCTGTTCCGTCAGCCAATCAAGTTGACGGCAGTAGTCCTGACCTCGCGTTCTCCTCAAGCAACAAGTGCACCCACTGGCCAGCCAGCGGCTAGCACAACCACACCCATATCTGCTGCAGGGGAGCAAACGACTGATGTCGTTTTCAGTGTGTCTACCAAGAAACCTGGCGATGAGAACCTCACACCACTGATAGACGACAACACCAACCAGCCCAAGTTGATAACTGTCCGTCTGGAAGGAAGCAACCCGGAAATCAAATACTTGCCGATAGATGAAGCTACACTTGAAGGGGTTACTGAAGTGGCCGTACAAATCCAGTCCGTCAGTGATGACGAAGCAACAACCTTTGAGTTGCACATCCTGGGTTGCACGGAAGAATACACGACTCAGCCGACGACAAGAACCACCAGAGTCACCACCACTGTGACAACCACGACTCCTCCCTCTTCAACAACTCAAGGGTACTGTCTGGATCCCATGGACAACGACTCCGGACTGCTGTCCGATGTCACTGGCAGAGGTTCCGTGTTGACCGACGAATCCAGACGTGACATCCAACTGACAGACCTACCCATCACTCCGGGAGCAGGCCAGTCTTCCACTCTGGACAGTGAATTCAACAGACGGGTTAATGTCAGAGCTATCAGGTTCAGGTTGCAGCCCACAGTATCTTCCACCACTCCGGCGGGCGCTGCTGAAGAAATCACTCCTCTTCGAGCTGATCTGGTCTTGTCGGTTTTGAAACCGGGAGACACTGACTTCACGCCCGTTTTGGATGGGGAAACTAACCAAGAGAAGGTTTTCTCAGTCACCCTTGACAGCAACTTGCCCGAAAGACTGCTGCTTCCGATCGACGACCCAGCTCTGCAGGGCGTTGAGCAGTTGCGTATCGAGTTCCGAAGTGTAACTGGTGGTGAATCAGCAAGACTGCAAGTGGACATTCTGGGATGTGCCGAAGAGTACACAACAACTGAAATGACCACCAAAGTCACCACAGTTACAACACCGACGACTGTCAGCGAAGAAACAACAAGCTCGCAAACCACGACGTCAATCATGTCGACTACACCAGgttactgcctagagccaatggacggtgaaaagggacttgaACCTGATGTAAAGGCAGTCGGAGACCTCACAGTCGATAGTCAGACCTCGTACTTGACCATCACCAAGTTGCCGATCGACCCAAGCTCAAGTGATATCCCCAGCGTAGAGTTCCTGTTCCGTCAGCCAATCAATGTGTCTACCAAGAAACCTGGCGATGAGAACCTCACACCACTGATAGACGACAACACCAACCAGCCCAAGTTGATAACTGTCCGTCTGGAAGGAAGCAACCCGGAAATCAAATACTTGCCGATAGATGAAGCTACACTTGAAGGGGTTACTGAAGTGGCCGTACAAATCCAGTCCGTCAGTGATGACGAAGCAACAACCTTTGAGTTGCACATCCTGGGTTGCACGGAAGAATACACGACTCAGCCGACGACAAGAACCACCAGAGTCACCACCACTGTGACAACCACGACTCCTCCCTCTTCAACAACTCAAGGGTACTGTCTGGATCCCATGGACAACGACTCCGGACTGCTGTCCGATGTCACTGGCAGAGGTTCCGTGTTGACCGACGAATCCAGACGTGACATCCAACTGACAGACCTACCCATCACTCCGGGAGCAGGCCAGTCTTCCACTCTGGACAGTGAATTCAACAGACGGGTTAATGTCAGAGCTATCAGGTTCAGGTTGCAGCCCACAGTATCTTCCACCACTCCGGCGGGCGCTGCTGAAGAAATCACTCCTCTTCGAGCTGATCTGGTCTTGTCGGTTTTGAAACCGGGAGACACTGACTTCACGCCCGTTTTGGATGGGGAAACTAACCAAGAGAAGGTTTTCTCAGTCACCCTTGACAGCAACTTGCCCGAAAGACTGCTGCTTCCGATCGACGACCCAGCTCTGCAGGGCGTTGAGCAGTTGCGTATCGAGTTCCGAAGTGTAACTGGTGGTGAATCAGCAAGACTGCAAGTGGACATTCTGGGATGTGCCGAAGAGTACACAACAACTGAAATGACCACCAAAGTCACCACAGTTACAACACCGACGACTGTCAGCGAAGAAACAACAAGCTCGCAAACCACGACGTCAATCATGTCGACTACACCAGgttactgcctagagccaatggacggtgaaaagggacttgaACCTGATGTAAAGGCAGTCGGAGACCTCACAGTCGATAGTCAGACCTCGTACTTGACCATCACCAAGTTGCCGATCGACCCAAGCTCAAGTGATATCCCCAGCGTAGAGTTCCTGTTCCGTCAGCCAATCAAGTTGACGGCAGTAGTCCTGACCTCGCGTTCTCCTCAAGCAACAAGTGCACCCACTGGCCAGCCAGCGGCTAGCACAACCACACCCATATCTGCTGCAGGGGAGCAAACGACTGATGTCGTTTTCAGTGTGTCTACCAAGAAACCTGGCGATGAGAACCTCACACCACTGATAGACGACAACACCAACCAGCCCAAGTTGATAACTGTCCGTCTGGAAGGAAGCAACCCGGAAATCAAATACTTGCCGATAGATGAAGCTACACTTGAAGGGGTTACTGAAGTGGCCGTACAAATCCAGTCCGTCAGTGATGACGAAGCAACAACCTTTGAGTTGCACATCCTGGGTTGCACGGAAGAATACACGACTCAGCCGACGACAAGAACCACCAGAGTCACCACCACTGTGACAACCACGACTCCTCCCTCTTCAACAACTCAAGGGTACTGTCTGGATCCCATGGACAACGACTCCGGACTGCTGTCCGATGTCACTGGCAGAGGTTCCGTGTTGACCGACGAATCCAGACGTGACATCCAACTGACAGACCTACCCATCACTCCGGGAGCAGGCCAGTCTTCCACTCTGGACAGTGAATTCAACAGACGGGTTAATGTCAGAGCTATCAGGTTCAGGTTGCAGCCCACAGTATCTTCCACCACTCCGGCGGGCGCTGCTGAAGAAATCACTCCTCTTCGAGCTGATCTGGTCTTGTCGGTTTTGAAACCGGGAGACACTGACTTCACGCCCGTTTTGGATGGGGAAACTAACCAAGAGAAGGTTTTCTCAGTCACCCTTGACAGCAACTTGCCCGAAAGACTGCTGCTTCCGATCGACGACCCAGCTCTGCAGGGCGTTGAGCAGTTGCGTATCGAGTTCCGAAGTGTAACTGGTGGTGAATCAGCAAGACTGCAAGTGGACATTCTGGGATGTGCCGAAGAGTACACAACAACTGAAATGACCACCAAAGTCACCACAGTTACAACACCGACGACTGTCAGCGAAGAAACAACAAGCTCGCAAACCACGACGTCAATCATGTCGACTACACCAGgttactgcctagagccaatggacggtgaaaagggacttgaACCTGATGTAAAGGCAGTCGGAGACCTCACAGTCGATAGTCAGACCTCGTACTTGACCATCACCAAGTTGCCGATCGACCCAAGCTCAAGTGATATCCCCAGCGTAGAGTTCCTGTTCCGTCAGCCAATCAAGTTGACGGCAGTAGTCCTGACCTCGCGTTCTCCTCAAGCAACAAGTGCACCCACTGGCCAGCCAGCGGCTAGCACAACCACACCCATATCTGCTGCAGGGGAGCAAACGACTGATGTCGTTTTCAGTGTGTCTACCAAGAAACCTGGCGATGAGAACCTCACACCACTGATAGACGACAACACCAACCAGCCCAAGTTGATAACTGTCCGTCTGGAAGGAAGCAACCCGGAAATCAAATACTTGCCGATAGATGAAGCTACACTTGAAGGGGTTACTGAAGTGGCCGTACAAATCCAGTCCGTCAGTGATGACGAAGCAACAACCTTTGAGTTGCACATCCTGGGTTGCACGGAAGAATACACGACTCAGCCGACGACAAGAACCACCAGAGTCACCACCACTGTGACAACCACGACTCCTCCCTCTTCAACAACTCAAGGGTACTGTCTGGATCCCATGGACAACGACTCCGGACTGCTGTCCGATGTCACTGGCAGAGGTTCCGTGTTGACCGACGAATCCAGACGTGACATCCAACTGACAGACCTACCCATCACTCCGGGAGCAGGCCAGTCTTCCACTCTGGACAGTGAATTCAACAGACGGGTTAATGTCAGAGCTATCAGGTTCAGGTTGCAGCCCACAGTATCTTCCACCACTCCGGCGGGCGCTGCTGAAGAAATCACTCCTCTTCGAGCTGATCTGGTCTTGTCGGTTTTGAAACCGGGAGACACTGACTTCACGCCCGTTTTGGATGGGGAAACTAACCAAGAGAAGGTTTTCTCAGTCACCCTTGACAGCAACTTGCCCGAAAGACTGCTGCTTCCGATCGACGACCCAGCTCTGCAGGGCGTTGAGCAGTTGCGTATCGAGTTCCGAAGTGTAACTGGTGGTGAATCAGCAAGACTGCAAGTGGACATTCTGGGATGTGCCGAAGAGTACACAACAACTGAAATGACCACCAAAGTCACCACAGTTACAACACCGACGACTGTCAGCGAAGAAACAACAAGCTCGCAAACCACGACGTCAATCATGTCGACTACACCAGgttactgcctagagccaatggacggtgaaaagggacttgaACCTGATGTAAAGGCAGTCGGAGACCTCACAGTCGATAGTCAGACCTCGTACTTGACCATCACCAAGTTGCCGATCGACCCAAGCTCAAGTGATATCCCCAGCGTAGAGTTCCTGTTCCGTCAGCCAATCAAGTTGACGGCAGTAGTCCTGACCTCGCGTTCTCCTCAAGCAACAAGTGCACCCACTGGCCAGCCAGCGGCTAGCACAACCACACCCATATCTGCTGCAGGGGAGCAAACGACTGATGTCGTTTTCAGTGTGTCTACCAAGAAACCTGGCGATGAGAACCTCACACCACTGATAGACGACAACACCAACCAGCCCAAGTTGATAACTGTCCGTCTGGAAGGAAGCAACCCGGAAATCAAATACTTGCCGATAGATGAAGCTACACTTGAAGGGGTTACTGAAGTGGCCGTACAAATCCAGTCCGTCAGTGATGACGAAGCAACAACCTTTGAGTTGCACATCCTGGGTTGCACGGAAGAATACACGACTCAGCCGACGACAAGAACCACCAGAGTCACCACCACTGTGACAACCACGACTCCTCCCTCTTCAACAACTCAAGGGTACTGTCTGGATCCCATGGACAACGACTCCGGACTGCTGTCCGATGTCACTGGCAGAGGTTCCGTGTTGACCGACGAATCCAGACGTGACATCCAACTGACAGACCTACCCATCACTCCGGGAGCAGGCCAGTCTTCCACTCTGGACAGTGAATTCAACAGACGGGTTAATGTCAGAGCTATCAGGTTCAGGTTGCAGCCCACAGTATCTTCCACCACTCCGGCGGGCGCTGCTGAAGAAATCACTCCTCTTCGAGCTGATCTGGTCTTGTCGGTTTTGAAACCGGGAGACACTGACTTCACGCCCGTTTTGGATGGGGAAACTAACCAAGAGAAGGTTTTCTCAGTCACCCTTGACAGCAACTTGCCCGAAAGACTGCTGCTTCCGATCGACGACCCAGCTCTGCAGGGCGTTGAGCAGTTGCGTATCGAGTTCCGAAGTGTAACTGGTGGTGAATCAGCAAGACTGCAAGTGGACATTCTGGGATGTGCCGAAGAGTACACAACAACTGAAATGACCACCAAAGTCACCACAGTTACAACACCGACGACTGTCAGCGAAGAAACAACAAGCTCGCAAACCACGACGTCAATCATGTCGACTACACCAGgttactgcctagagccaatggacggtgaaaagggacttgaACCTGATGTAAAGGCAGTCGGAGACCTCACAGTCGATAGTCAGACCTCGTACTTGACCATCACCAAGTTGCCGATCGACCCAAGCTCAAGTGATATCCCCAGCGTAGAGTTCCTGTTCCGTCAGCCAATCAAGTTGACGGCAGTAGTCCTGACCTCGCGTTCTCCTCAAGCAACAAGTGCACCCACTGGCCAGCCAGCGGCTAGCACAACCACACCCATATCTGCTGCAGGGGAGCAAACGACTGATGTCGTTTTCAGTGTGTCTACCAAGAAACCTGGCGATGAGAACCTCACACCACTGATAGACGACAACACCAACCAGCCCAAGTTGATAACTGTCCGTCTGGAAGGAAGCAACCCGGAAATCAAATACTTGCCGATAGATGAAGCTACACTTGAAGGGGTTACTGAAGTGGCCGTACAAATCCAGTCCGTCAGTGATGACGAAGCAACAACCTTTGAGTTGCACATCCTGGGTTGCACGGAAGAATACACGACTCAGCCGACGACAAGAACCACCAGAGTCACCACCACTGTGACAACCACGACTCCTCCCTCTTCAACAACTCAAGGGTACTGTCTGGATCCCATGGACAACGACTCCGGACTGCTGTCCGATGTCACTGGCAGAGGTTCCGTGTTGACCGACGAATCCAGACGTGACATCCAACTGACAGACCTACCCATCACTCCGGGAGCAGGCCAGTCTTCCACTCTGGACAGTGAATTCAACAGACGGGTTAATGTCAGAGCTATCAGGTTCAGGTTGCAGCCCACAGTATCTTCCACCACTCCGGCGGGCGCTGCTGAAGAAATCACTCCTCTTCGAGCTGATCTGGTCTTGTCGGTTTTGAAACCGGGAGACACTGACTTCACGCCCGTTTTGGATGGGGAAACTAACCAAGAGAAGGTTTTCTCAGTCACCCTTGACAGCAACTTGCCCGAAAGACTGCTGCTTCCGATCGACGACCCAGCTCTGCAGGGCGTTGAGCAGTTGCGTATCGAGTTCCGAAGTGTAACTGGTGGTGAATCAGCAAGACTGCAAGTGGACATTCTGGGATGTGCCGAAGAGTACACAACAACTGAAATGACCACCAAAGTCACCACAGTTACAACACCGACGACTGTCAGCGAAGAAACAACAAGCTCGCAAACCACGACGTCAATCATGTCGACTACACCAGgttactgcctagagccaatggacggtgaaaagggacttgaACCTGATGTAAAGGCAGTCGGAGACCTCACAGTCGATAGTCAGACCTCGTACTTGACCATCACCAAGTTGCCGATCGACCCAAGCTCAAGTGATATCCCCAGCGTAGAGTTCCTGTTCCGTCAGCCAATCAAGTTGACGGCAGTAGTCCTGACCTCGCGTTCTCCTCAAGCAACAAGTGCACCCACTGGCCAGCCAGCGGCTAGCACAACCACACCCATATCTGCTGCAGGGGAGCAAACGACTGATGTCGTTTTCAGTGTGTCTACCAAGAAACCTGGCGATGAGAACCTCACACCACTGATAGACGACAACACCAACCAGCCCAAGTTGATAACTGTCCGTCTGGAAGGAAGCAACCCGGAAATCAAATACTTGCCGATAGATGAAGCTACACTTGAAGGGGTTACTGAAGTGGCCGTACAAATCCAGTCCGTCAGTGATGACGAAGCAACAACCTTTGAGTTGCACATCCTGGGTTGCACGGAAGAATACACGACTCAGCCGACGACAAGAACCACCAGAGTCACCACCACTGTGACAACCACGACTCCTCCCTCTTCAACAACTCAAGGGTACTGTCTGGATCCCATGGACAACGACTCCGGACTGCTGTCCGATGTCACTGGCAGAGGTTCCGTGTTGACCGACGAATCCAGACGTGACATCCAACTGACAGACCTACCCATCACTCCGGGAGCAGGCCAGTCTTCCACTCTGGACAGTGAATTCAACAGACGGGTTAATGTCAGAGCTATCAGGTTCAGGTTGCAGCCCACAGTATCTTCCACCACTCCGGCGGGCGCTGCTGAAGAAATCACTCCTCTTCGAGCTGATCTGGTCTTGTCGGTTTTGAAACCGGGAGACACTGACTTCACGCCCGTTTTGGATGGGGAAACTAACCAAGAGAAGGTTTTCTCAGTCACCCTTGACAGCAACTTGCCCGAAAGACTGCTGCTTCCGATCGACGACCCAGCTCTGCAGGGCGTTGAGCAGTTGCGTATCGAGTTCCGAAGTGTAACTGGTGGTGAATCAGCAAGACTGCAAGTGGACATTCTGGGATGTGCCGAAGAGTACACAACAACTGAAATGACCACCAAAGTCACCACAGTTACAACACCGACGACTGTCAGCGAAGAAACAACAAGCTCGCAAACCACGACGTCAATCATGTCGACTACACCAGgttactgcctagagccaatggacggtgaaaagggacttgaACCTGATGTAAAGGCAGTCGGAGACCTCACAGTCGATAGTCAGACCTCGTACTTGACCATCACCAAGTTGCCGATCGACCCAAGCTCAAGTGATATCCCCAGCGTAGAGTTCCTGTTCCGTCAGCCAATCAAGTTGACGGCAGTAGTCCTGACCTCGCGTTCTCCTCAAGCAACAAGTGCACCCACTGGCCAGCCAGCGGCTAGCACAACCACACCCATATCTGCTGCAGGGGAGCAAACGACTGATGTCGTTTTCAGTGTGTCTACCAAGAAACCTGGCGATGAGAACCTCACACCACTGATAGACGACAACACCAACCAGCCCAAGTTGATAACTGTCCGTCTGGAAGGAAGCAACCCGGAAATCAAATACTTGCCGATAGATGAAGCTACACTTGAAGGGGTTACTGAAGTGGCCGTACAAATCCAGTCCGTCAGTGATGACGAAGCAACAACCTTTGAGTTGCACATCCTGGGTTGCACGGAAGAATACACGACTCAGCCGACGACAAGAACCACCAGAGTCACCACCACTGTGACAACCACGACTCCTCCCTCTTCAACAACTCAAGGGTACTGTCTGGATCCCATGGACAACGACTCCGGACTGCTGTCCGATGTCACTGGCAGAGGTTCCGTGTTGACCGACGAATCCAGACGTGACATCCAACTGACAGACCTACCCATCACTCCGGGAGCAGGCCAGTCTTCCACTCTGGACAGTGAATTCAACAGACGGGTTAATGTCAGAGCTATCAGGTTCAGGTTGCAGCCCACAGTATCTTCCACCACTCCGGCGGGCGCTGCTGAAGAAATCACTCCTCTTCGAGCTGATCTGGTCTTGTCGGTTTTGAAACCGGGAGACACTGACTTCACGCCCGTTTTGGATGGGGAAACTAACCAAGAGAAGGTTTTCTCAGTCACCCTTGACAGCAACTTGCCCGAAAGACTGCTGCTTCCGATCGACGACCCAGCTCTGCAGGGCGTTGAGCAGTTGCGTATCGAGTTCCGAAGTGTAACTGGTGGTGAATCAGCAAGACTGCAAGTGGACATTCTGGGATGTGCCGAAGAGTACACAACAACTGAAATGACCACCAAAGTCACCACAGTTACAACACCGACGACTGTCAGCGAAGAAACAACAAGCTCGCAAACCACGACGTCAATCATGTCGACTACACCAGgttactgcctagagccaatggacggtgaaaagggacttgaACCTGATGTAAAGGCAGTCGGAGACCTCACAGTCGATAGTCAGACCTCGTACTTGACCATCACCAAGTTGCCGATCGACCCAAGCTCAAGTGATATCCCCAGCGTAGAGTTCCTGTTCCGTCAGCCAATCAAGTTGACGGCAGTAGTCCTGACCTCGCGTTCTCCTCAAGCAACAAGTGCACCCACTGGCCAGCCAGCGGCTAGCACAACCACACCCATATCTGCTGCAGGGGAGCAAACGACTGATGTCGTTTTCAGTGTGTCTACCAAGAAACCTGGCGATGAGAACCTCACACCACTGATAGACGACAACACCAACCAGCCCAAGTTGATAACTGTCCGTCTGGAAGGAAGCAACCCGGAAATCAAATACTTGCCGATAGATGAAGCTACACTTGAAGGGGTTACTGAAGTGGCCGTACAAATCCAGTCCGTCAGTGATGACGAAGCAACAACCTTTGAGTTGCACATCCTGGGTTGCACGGAAGAATACACGACTCAGCCGACGACAAGAACCACCAGAGTCACCACCACTGTGACAACCACGACTCCTCCCTCTTCAACAACTCAAGGGTACTGTCTGGATCCCATGGACAACGACTCCGGACTGCTGTCCGATGTCACTGGCAGAGGTTCCGTGTTGACCGACGAATCCAGACGTGACATCCAACTGACAGACCTACCCATCACTCCGGGAGCAGGCCAGTCTTCCACTCTGGACAGTGAATTCAACAGACGGGTTAATGTCAGAGCTATCAGGTTCAGGTTGCAGCCCACAGTATCTTCCACCACTCCGGCGGGCGCTGCTGAAGAAATCACTCCTCTTCGAGCTGATCTGGTCTTGTCGGTTTTGAAACCGGGAGACACTGACTTCACGCCCGTTTTGGATGGGGAAACTAACCAAGAGAAGGTTTTCTCAGTCACCCTTGACAGCAACTTGCCCGAAAGACTGCTGCTTCCGATCGACGACCCAGCTCTGCAGGGCGTTGAGCAGTTGCGTATCGAGTTCCGAAGTGTAACTGGTGGTGAATCAGCAAGACTGCAAGTGGACATTCTGGGATGTGCCGAAGAGTACACAACAACTGAAATGACCACCAAAGTCACCACAGTTACAACACCGACGACTGTCAGCGAAGAAACAACAAGCTCGCAAACCACGACGTCAATCATGTCGACTACACCAGgttactgcctagagccaatggacggtgaaaagggacttgaACCTGATGTAAAGGCAGTCGGAGACCTCACAGTCGATAGTCAGACCTCGTACTTGACCATCACCAAGTTGCCGATCGACCCAAGCTCAAGTGATATCCCCAGCGTAGAGTTCCTGTTCCGTCAGCCAATCAAGTTGACGGCAGTAGTCCTGACCTCGCGTTCTCCTCAAGCAACAAGTGCACCCACTGGCCAGCCAGCGGCTAGCACAACCACACCCATATCTGCTGCAGGGGAGCAAACGACTGATGTCGTTTTCAGTGTGTCTACCAAGAAACCTGGCGATGAGAACCTCACACCACTGATAGACGACAACACCAACCAGCCCAAGTTGATAACTGTCCGTCTGGAAGGAAGCAACCCGGAAATCAAATACTTGCCGATAGATGAAGCTACACTTGAAGGGGTTACTGAAGTGGCCGTACAAATCCAGTCCGTCAGTGATGACGAAGCAACAACCTTTGAGTTGCACATCCTGGGTTGCACGGAAGAATACACGACTCAGCCGACGACAAGAACCACCAGAGTCACCACCACTGTGACAACCACGACTCCTCCCTCTTCAACAACTCAAGGGTACTGTCTGGATCCCATGGACAACGACTCCGGACTGCTGTCCGATGTCACTGGCAGAGGTTCCGTGTTGACCGACGAATCCAGACGTGACATCCAACTGACAGACCTACCCATCACTCCGGGAGCAGGCCAGTCTTCCACTCTGGACAGTGAATTCAACAGACGGGTTAATGTCAGAGCTATCAGGTTCAGGTTGCAGCCCACAGTATCTTCCACCACTCCGGCGGGCGCTGCTGAAGAAATCACTCCTCTTCGAGCTGATCTGGTCTTGTCGGTTTTGAAACCGGGAGACACTGACTTCACGCCCGTTTTGGATGGGGAAACTAACCAAGAGAAGGTTTTCTCAGTCACCCTTGACAGCAACTTGCCCGAAAGACTGCTGCTTCCGATCGACGACCCAGCTCTGCAGGGCGTTGAGCAGTTGCGTATCGAGTTCCGAAGTGTAACTGGTGGTGAATCAGCAAGACTGCAAGTGGACATTCTGGGATGTGCCGAAGAGTACACAACAACTGAAATGACCACCAAAGTCACCACAGTTACAACACCGACGACTGTCAGCGAAGAAACAACAAGCTCGCAAACCACGACGTCAATCATGTCGACTACACCAGgttactgcctagagccaatggacggtgaaaagggacttgaACCTGATGTAAAGGCAGTCGGAGACCTCACAGTCGATAGTCAGACCTCGTACTTGACCATCACCAAGTTGCCGATCGACCCAAGCTCAAGTGATATCCCCAGCGTAGAGTTCCTGTTCCGTCAGCCAATCAAGTTGACGGCAGTAGTCCTGACCTCGCGTTCTCCTCAAGCAACAAGTGCACCCACTGGCCAGCCAGCGGCTAGCACAACCACACCCATATCTGCTGCAGGGGAGCAAACGACTGATGTCGTTTTCAGTGTGTCTACCAAGAAACCTGGCGATGAGAACCTCACACCACTGATAGACGACAACACCAACCAGCCCAAGTTGATAACTGTCCGTCTGGAAGGAAGCAACCCGGAAATCAAATACTTGCCGATAGATGAAGCTACACTTGAAGGGGTTACTGAAGTGGCCGTACAAATCCAGTCCGTCAGTGATGACGAAGCAACAACCTTTGAGTTGCACATCCTGGGTTGCACGGAAGAATACACGACTCAGCCGACGACAAGAACCACCAGAGTCACCACCACTGTGACAACCACGACTCCTCCCTCTTCAACAACTCAAGGGTACTGTCTGGATCCCATGGACAACGACTCCGGACTGCTGTCCGATGTCACTGGCAGAGGTTCCGTGTTGACCGACGAATCCAGACGTGACATCCAACTGACAGACCTACCCATCACTCCGGGAGCAGGCCAGTCTTCCACTCTGGACAGTGAATTCAACAGACGGGTTAATGTCAGAGCTATCAGGTTCAGGTTGCAGCCCACAGTATCTTCCACCACTCCGGCGGGCGCTGCTGAAGAAATCACTCCTCTTCGAGCTGATCTGGTCTTGTCGGTTTTGAAACCGGGAGACACTGACTTCACGCCCGTTTTGGATGGGGAAACTAACCAAGAGAAGGTTTTCTCAGTCACCCTTGACAGCAACTTGCCCGAAAGACTGCTGCTTCCGATCGACGACCCAGCTCTGCAGGGCGTTGAGCAGTTGCGTATCGAGTTCCGAAGTGTAACTGGTGGTGAATCAGCAAGACTGCAAGTGGACATTCTGGGATGTGCCGAAGAGTACACAACAACTGAAATGACCACCAAAGTCACCACAGTTACAACACCGACGACTGTCAGCGAAGAAACAACAAGCTCGCAAACCACGACGTCAATCATGTCGACTACACCAGgttactgcctagagccaatggacggtgaaaagggacttgaACCTGATGTAAAGGCAGTCGGAGACCTCACAGTCGATAGTCAGACCTCGTACTTGACCATCACCAAGTTGCCGATCGACCCAAGCTCAAGTGATATCCCCAGCGTAGAGTTCCTGTTCCGTCAGCCAATCAAGTTGACGGCAGTAGTCCTGACCTCGCGTTCTCCTCAAGCAACAAGTGCACCCACTGGCCAGCCAGCGGCTAGCACAACCACACCCATATCTGCTGCAGGGGAGCAAACGACTGATGTCGTTTTCAGTGTGTCTACCAAGAAACCTGGCGATGAGAACCTCACACCACTGATAGACGACAACACCAACCAGCCCAAGTTGATAACTGTCCGTCTGGAAGGAAGCAACCCGGAAATCAAATACTTGCCGATAGATGAAGCTACACTTGAAGGGGTTACTGAAGTGGCCGTACAAATCCAGTCCGTCAGTGATGACGAAGCAACAACCTTTGAGTTGCACATCCTGGGTTGCACGGAAGAATACACGACTCAGCCGACGACAAGAACCACCAGAGTCACCACCACTGTGACAACCACGACTCCTCCCTCTTCAACAACTCAAGGGTACTGTCTGGATCCCATGGACAACGACTCCGGACTGCTGTCCGATGTCACTGGCAGAGGTTCCGTGTTGACCGACGAATCCAGACGTGACATCCAACTGACAGACCTACCCATCACTCCGGGAGCAGGCCAGTCTTCCACTCTGGACAGTGAATTCAACAGACGGGTTAATGTCAGAGCTATCAGGTTCAGGTTGCAGCCCACAGTATCTTCCACCACTCCGGCGGGCGCTGCTGAAGAAATCACTCCTCTTCGAGCTGATCTGGTCTTGTCGGTTTTGAAACCGGGAGACACTGACTTCACGCCCGTTTTGGATGGGGAAACTAACCAAGAGAAGGTTTTCTCAGTCACCCTTGACAGCAACTTGCCCGAAAGACTGCTGCTTCCGATCGACGACCCAGCTCTGCAGGGCGTTGAGCAGTTGCGTATCGAGTTCCGAAGTGTAACTGGTGGTGAATCAGCAAGACTGCAAGTGGACATTCTGGGATGTGCCGAAGAGTACACAACAACTGAAATGACCACCAAAGTCACCACAGTTACAACACCGACGACTGTCAGCGAAGAAACAACAAGCTCGCAAACCACGACGTCAATCATGTCGACTACACCAGgttactgcctagagccaatggacggtgaaaagggacttgaACCTGATGTAAAGGCAGTCGGAGACCTCACAGTCGATAGTCAGACCTCGTACTTGACCATCACCAAGTTGCCGATCGACCCAAGCTCAAGTGATATCCCCAGCGTAGAGTTCCTGTTCCGTCAGCCAATCAAGTTGACGGCAGTAGTCCTGACCTCGCGTTCTCCTCAAGCAACAAGTGCACCCACTGGCCAGCCAGCGGCTAGCACAACCACACCCATATCTGCTGCAGGGGAGCAAACGACTGATGTCGTTTTCAGTGTGTCTACCAAGAAACCTGGCGATGAGAACCTCACACCACTGATAGACGACAACACCAACCAGCCCAAGTTGATAACTGTCCGTCTGGAAGGAAGCAACCCGGAAATCAAATACTTGCCGATAGATGAAGCTACACTTGAAGGGGTTACTGAAGTGGCCGTACAAATCCAGTCCGTCAGTGATGACGAAGCAACAACCTTTGAGTTGCACATCCTGGGTTGCACGGAAGAATACACGACTCAGCCGACGACAAGAACCACCAGAGTCACCACCACTGTGACAACCACGACTCCTCCCTCTTCAACAACTCAAGGGTACTGTCTGGATCCCATGGACAACGACTCCGGACTGCTGTCCGATGTCACTGGCAGAGGTTCCGTGTTGACCGACGAATCCAGACGTGACATCCAACTGACAGACCTACCCATCACTCCGGGAGCAGGCCAGTCTTCCACTCTGGACAGTGAATTCAACAGACGGGTTAATGTCAGAGCTATCAGGTTCAGGTTGCAGCCCACAGTATCTTCCACCACTCCGGCGGGCGCTGCTGAAGAAATCACTCCTCTTCGAGCTGATCTGGTCTTGTCGGTTTTGAAACCGGGAGACACTGACTTCACGCCCGTTTTGGATGGGGAAACTAACCAAGAGAAGGTTTTCTCAGTCACCCTTGACAGCAACTTGCCCGAAAGACTGCTGCTTCCGATCGACGACCCAGCTCTGCAGGGCGTTGAGCAGTTGCGTATCGAGTTCCGAAGTGTAACTGGTGGTGAATCAGCAAGACTGCAAGTGGACATTCTGGGATGTGCCGAAGAGTACACAACAACTGAAATGACCACCAAAGTCACCACAGTTACAACACCGACGACTGTCAGCGAAGAAACAACAAGCTCGCAAACCACGACGTCAATCATGTCGACTACACCAGgttactgcctagagccaatggacggtgaaaagggacttgaACCTGATGTAAAGGCAGTCGGAGACCTCACAGTCGATAGTCAGACCTCGTACTTGACCATCACCAAGTTGCCGATCGACCCAAGCTCAAGTGATATCCCCAGCGTAGAGTTCCTGTTCCGTCAGCCAATCAAGTTGACGGCAGTAGTCCTGACCTCGCGTTCTCCTCAAGCAACAAGTGCACCCACTGGCCAGCCAGCGGCTAGCACAACCACACCCATATCTGCTGCAGGGGAGCAAACGACTGATGTCGTTTTCAGTGTGTCTACCAAGAAACCTGGCGATGAGAACCTCACACCACTGATAGACGACAACACCAACCAGCCCAAGTTGATAACTGTCCGTCTGGAAGGAAGCAACCCGGAAATCAAATACTTGCCGATAGATGAAGCTACACTTGAAGGGGTTACTGAAGTGGCCGTACAAATCCAGTCCGTCAGTGATGACGAAGCAACAACCTTTGAGTTGCACATCCTGGGTTGCACGGAAGAATACACGACTCAGCCGACGACAAGAACCACCAGAGTCACCACCACTGTGACAACCACGACTCCTCCCTCTTCAACAACTCAAGGGTACTGTCTGGATCCCATGGACAACGACTCCGGACTGCTGTCCGATGTCACTGGCAGAGGTTCCGTGTTGACCGACGAATCCAGACGTGACATCCAACTGACAGACCTACCCATCACTCCGGGAGCAGGCCAGTCTTCCACTCTGGACAGTGAATTCAACAGACGGGTTAATGTCAGAGCTATCAGGTTCAGGTTGCAGCCCACAGTATCTTCCACCACTCCGGCGGGCGCTGCTGAAGAAATCACTCCTCTTCGAGCTGATCTGGTCTTGTCGGTTTTGAAACCGGGAGACACTGACTTCACGCCCGTTTTGGATGGGGAAACTAACCAAGAGAAGGTTTTCTCAGTCACCCTTGACAGCAACTTGCCCGAAAGACTGCTGCTTCCGATCGACGACCCAGCTCTGCAGGGCGTTGAGCAGTTGCGTATCGAGTTCCGAAGTGTAACTGGTGGTGAATCAGCAAGACTGCAAGTGGACATTCTGGGATGTGCCGAAGAGTACACAACAACTGAAATGACCACCAAAGTCACCACAGTTACAACACCGACGACTGTCAGCGAAGAAACAACAAGCTCGCAAACCACGACGTCAATCATGTCGACTACACCAGgttactgcctagagccaatggacggtgaaaagggacttgaACCTGATGTAAAGGCAGTCGGAGACCTCACAGTCGATAGTCAGACCTCGTACTTGACCATCACCAAGTTGCCGATCGACCCAAGCTCAAGTGATATCCCCAGCGTAGAGTTCCTGTTCCGTCAGCCAATCAAGTTGACGGCAGTAGTCCTGACCTCGCGTTCTCCTCAAGCAACAAGTGCACCCACTGGCCAGCCAGCGGCTAGCACAACCACACCCATATCTGCTGCAGGGGAGCAAACGACTGATGTCGTTTTCAGTGTGTCTACCAAGAAACCTGGCGATGAGAACCTCACACCACTGATAGACGACAACACCAACCAGCCCAAGTTGATAACTGTCCGTCTGGAAGGAAGCAACCCGGAAATCAAATACTTGCCGATAGATGAAGCTACACTTGAAGGGGTTACTGAAGTGGCCGTACAAATCCAGTCCGTCAGTGATGACGAAGCAACAACCTTTGAGTTGCACATCCTGGGTTGCACGGAAGAATACACGACTCAGCCGACGACAAGAACCACCAGAGTCACCACCACTGTGACAACCACGACTCCTCCCTCTTCAACAACTCAAGGGTACTGTCTGGATCCCATGGACAACGACTCCGGACTGCTGTCCGATGTCACTGGCAGAGGTTCCGTGTTGACCGACGAATCCAGACGTGACATCCAACTGACAGACCTACCCATCACTCCGGGAGCAGGCCAGTCTTCCACTCTGGACAGTGAATTCAACAGACGGGTTAATGTCAGAGCTATCAGGTTCAGGTTGCAGCCCACAGTATCTTCCACCACTCCGGCGGGCGCTGCTGAAGAAATCACTCCTCTTCGAGCTGATCTGGTCTTGTCGGTTTTGAAACCGGGAGACACTGACTTCACGCCCGTTTTGGATGGGGAAACTAACCAAGAGAAGGTTTTCTCAGTCACCCTTGACAGCAACTTGCCCGAAAGACTGCTGCTTCCGATCGACGACCCAGCTCTGCAGGGCGTTGAGCAGTTGCGTATCGAGTTCCGAAGTGTAACTGGTGGTGAATCAGCAAGACTGCAAGTGGACATTCTGGGATGTGCCGAAGAGTACACAACAACTGAAATGACCACCAAAGTCACCACAGTTACAACACCGACGACTGTCAGCGAAGAAACAACAAGCTCGCAAACCACGACGTCCAGACACCCTATAACTGAGCCAACCACAAGAAGCACTACTGTCACGACAACCCGCATGACCACGACTTCTCCGGCACCAACAACCCAAGGCTACTGTTTGGAAACTTTGAACAGTGAATCCGGACTTCTGTCAAATGTAGAACCCCAGGGCTTGTCAGTGCTAGACGAAAGTCTGGGACTCCTCCAATTGCAAGATCTTCCCATCACCGAGGGAGCAGCAGAGAGCCCTAGCCTAGACAGTACATTCAACAGACGTATCATTGCCAGAGCTATCAGCCTGAGGTTGTTGCCAACTTCCTCCACAACTCCGGCGGGTACTGGTGCAGAGCCGACATCACGTCAACTTAGCTTCACTGTACAGGTCAAGAAACCGGGAGACCAAGAATATTCGCCTTTGCGAGAAGCATCCTCAGATCAAGAAAAGCTCTTCCAGGCCAACCTTCTGGAGGACCAGTCTAAGACAGTGCTGCTTCCAAGTGACGATGCAACTCTCCAAGGTGCACTGCAGCTCCGCATTCAGTTCCGAACTGTGTCCGGTGTTGGATCGGCAAGATTGGAAGTGCACATCCTTGGATGCGAAGAAGAATACACCACAACTGAGATGACAACGACAGTCACTACTGTAACCACACCAACAACAACTGTCGCCGAAGAAACAACCACCTCACGGTCCACAACATCTGAGATTTCAACCACTCCAGGATACTGCCAAGAGGAAATGGACGGCGAAGAGGGTCTTGAGTCTGAAGTGACGGCAGATGGAACACTCACAATTGACGATCAGACCTCCTACGTGACCATACCCGAATTGCCAATCAGCCAGCCAAGCGCAGGCAGTTTCCCAAGTGTGGAGCGCAAATTCCGCCGACGGGTCAGGATCACAGCACTGCGCACCACATTGCGTTCGTCTAGTCAGGCGGGAGAGGGCACAACCACAGCAGTGCCTGCTGCAGGAGAGCAACCCATTGAAATCACTGCCGTAGTGCTGACAAAGAAGCCGGGAGACAACAGCTTTTCTCCACTGATGGACGAATCCACCAACCAGCCCAAGTTGATAACCATTACTCTGAATGGAGATCAACCAGCATCAACTCCCTTGCCCGAAGACGAAGATGCTTTGGATGACGTTACCGAGATGCGCTTGGAGTTCCGCAGTGTCCTCGGTGTTGATGAAATAACGTTTGAGCAACACGTACTGGGTTGTATCAAAGAATACACTACAACTGAGCCAACCACAAGAAGCACTACTGTCACGACAACCCGCATGACCACGACTTCTCCGGCACCAACAACCCAAGGCTACTGTTTGGAAACTTTGAACAGTGAATCCGGACTTCTGTCAAATGTAGAACCCCAGGGCTTGTCAGTGCTAGACGAAAGTCTGGGACTCCTCCAATTGCAAGATCTTCCCATCACCGAGGGAGCAGCAGAGAGCCCTAGCCTAGACAGTACATTCAACAGACGTATCATTGCCAGAGCTATCAGCCTGAGGTTGTTGCCAACTTCCTCCACAACTCCGGCGGGTACTGGTGCAGAGCCGACATCACGTCAACTTAGCTTCACTGTACAGGTCAAGAAACCGGGAGACCAAGAATATTCGCCTTTGCGAGAAGCATCCTCAGATCAAGAAAAGATCTTCCAGGCCAACCTTCTGGAGGACCAGTCTAAGACAGTGCTGCTTCCAAGTGACGATGCAACTCTCCAAGGTGCACTGCAGCTCCGCATTCAGTTCCGAACTGTGTCCGGTGTTGGATCGGCAAGATTGGAAGTGCACATCCTTGGATGCGAAGAAGAATACACCACAACTGAGATGACAACGACAGTCACTACTGTAACCACACCAACAACAACTGTCACCGAAGAAACAACCACCTCACGGTCCACAACATCTGAGATTTCAACCACTCCAGGATACTGCCAAGAGGAAATGGACGGCGAAGAGGGTCTTGAGTCTGAAGTGACGGCAGATGGAACACTCACAATTGACGATCAGACCTCCTACGTGACCATACCCGAATTGCCAATCAGCCAGAGCGCAGGCAGTTTCCCAAGTGTGGAGCGCAAATTCCGCCGACGGGTCAGGATCACAGCACTGCGCACCACATTGCGTTCGTCTAGTCAGGCGGGAGAGGGCACAACCACAGCAGTGCCTGCTGCAGGAGAGCAACCCATTGAAATCACTGCCGTAGTGCTGACAAAGAAGCCGGGAGACAACAGCTTTTCTCCACTGATGGACGAATCCACCAACCAGCCCAAGTTGATAACCATTACTCTGAATGGAGATCAACCAGCATCAACTCCCTTGCCCGAAGACGAAGATGCTTTGGATGACGTTACCGAGATGCGCTTGGAGTTCCGCAGTGTCCTCGGTGTTGATGAAATAACGTTTGAGCAACACGTACTGGGTTGTATCAAAGAATACACTACAACTGAGCCAACCACAAGAAGCACTACTGTCACGACAACCCGCATGACCACGACTTCTCCGGCACCAACAACCCAAGGCTACTGTTTGGAAACTTTGAACAGTGAATCCGGACTTCTGTCAAATGTAGAACCCCAGGGCTTGTCAGTGCTAGACGAAAGTCTGGGACTCCTCCAATTGCAAGATCTTCCCATCACCGAGGGAGCAGCAGAGAGCCCTAGCCTAGACAGTACATTCAACAGACGTATCATTGCCAGAGCTATCAGCCTGAGGTTGTTGCCAACTTCCTCCACAACTCCGGCGGGTACTGGTGCAGAGCCGACATCACGTCAACTTAGCTTCACTGTACAGGTCAAGAAACCGGGAGACCAAGAATATTCGCCTTTGCGAGAAGCATCCTCAGATCAAGAAAAGCTCTTCCAGGCCAACCTTCTGGAGGACCAGTCTAAGACAGTGCTGCTTCCAAGTGACGATGCAACTCTCCAAGGTGCACTGCAGCTCCGCATTCAGTTCCGAACTGTGTCCGGTGTTGGATCGGCAAGATTGGAAGTGCACATCCTTGGATGCGAAGAAGAATACACCACAACTGAGATGACAACGACAGTCACTACTGTAACCACACCAACAACAACTGTCGCCGAAGAAACAACCACCTCACGGTCCACAACATCTGAGATTTCAACCACTCCAGGATACTGCCAAGAGGAAATGGACGGCGAAGAGGGTCTTGAGTCTGAAGTGACGGCAGATGGAACACTCACAATTGACGATCAGACCTCCTACGTGACCATACCCGAATTGCCAATCAGCCAGCCAAGCGCAGGCAGTTTCCCAAGTGTGGAGCGCAAATTCCGCCGACGGGTCAGGATCACAGCACTGCGCACCACATTGCGTTCGTCTAGTCAGGCGGGAGAGGGCACAACCACAGCAGTGCCTGCTGCAGGAGAGCAACCCATTGAAATCACTGCCGTAGTGCTGACAAAGAAGCCGGGAGACAACAGCTTTTCTCCACTGATGGACGAATCCACCAACCAGCCCAAGTTGATAACCATTACTCTGAATGGAGATCAACCAGCATCAACTCCCTTGCCCGAAGACGAAGATGCTTTGGATGACGTTACCGAGATGCGCTTGGAGTTCCGCAGTGTCCTCGGTGTTGATGAAATAACGTTTGAGCAACACGTACTGGGTTGTATCAAAGAATACACTACAACTGAGCCAACCACAAGAAGCACTACTGTCACGACAACCCGCATGACCACGACTTCTCCGGCACCAACAACCCAAGGCTACTGTTTGGAAACTTTGAACAGTGAATCCGGACTTCTGTCAAATGTAGAACCCCAGGGCTTGTCAGTGCTAGACGAAAGTCTGGGACTCCTCCAATTGCAAGATCTTCCCATCACCGAGGGAGCAGCAGAGAGCCCTAGCCTAGACAGTACATTCAACAGACGTATCATTGCCAGAGCTATCAGCCTGAGGTTGTTGCCAACTTCCTCCACAACTCCGGCGGGTACTGGTGCAGAGCCGACATCACGTCAACTTAGCTTCACTGTACAGGTCAAGAAACCGGGAGACCAAGAATATTCGCCTTTGCGAGAAGCATCCTCAGATCAAGAAAAGCTCTTCCAGGCCAACCTTCTGGAGGACCAGTCTAAGACAGTGCTGCTTCCAAGTGACGATGCAACTCTCCAAGGTGCACTGCAGCTCCGCATTCAGTTCCGAACTGTGTCCGGTGTTGGATCGGCAAGATTGGAAGTGCACATCCTTGGATGCGAAGAAGAATACACCACAACTGAGATGACAACGACAGTCACTACTGTAACCACACCAACAACAACTGTCGCCGAAGAAACAACCACCTCACGGTCCACAACATCTGAGATTTCAACCACTCCAGGATACTGCCAAGAGGAAATGGACGGCGAAGAGGGTCTTGAGTCTGAAGTGACGGCAGATGGAACACTCACAATTGACGATCAGACCTCCTACGTGACCATACCCGAATTGCCAATCAGCCAGCCAAGCGCAGGCAGTTTCCCAAGTGTGGAGCGCAAATTCCGCCGACGGGTCAGGATCACAGCACTGCGCACCACATTGCGTTCGTCTAGTCAGGCGGGAGAGGGCACAACCACAGCAGTGCCTGCTGCAGGAGAGCAACCCATTGAAATCACTGCCGTAGTGCTGACAAAGAAGCCGGGAGACAACAGCTTTTCTCCACTGATGGACGAATCCACCAACCAGCCCAAGTTGATAACCATTACTCTGAATGGAGATCAACCAGCATCAACTCCCTTGCCCGAAGACGAAGATGCTTTGGATGACGTTACCGAGATGCGCTTGGAGTTCCACAGTGTCCTCGGTGTTGATGAAATAACGTTTGAGCAACACGTACTGGGTTGTATCAAAGAATACACTACAACTGAGCCAACCACAAGAAGCACTACTGTCACGACAACCCGCATGACCACGACTTCTCCGGCACCAACAACCCAAGGCTACTGTTTGGAAACTTTGAACAGTGAATCCGGACTTCTGTCAAATGTAGAACCCCAGGGCTTGTCAGTGCTAGACGAAAGTCTGGGACTCCTCCAATTGCAAGATCTTCCCATCACCGAGGGAGCAGCAGAGAGCCCTAGCCTAGACAGTACATTCAACAGACGTATCATTGCCAGAGCTATCAGCCTGAGGTTGTTGCCAACTTCCTCCACAACTCCGGCGGGTACTGGTGCAGAGCCGACATCACGTCAACTTAGCTTCACTGTACAGGTCAAGAAACCGGGAGACCAAGAATATTCGCCTTTGCGAGAAGCATCCTCAGATCAAGAAAAGATCTTCCAGGCCAACCTTCTGGAGGACCAGTCTAAGACAGTGCTGCTTCCAAGTGACGATGCAACTCTCCAAGGTGCACTGCAGCTCCGCATTCAGTTCCGAACTGTGTCCGGTGTTGGATCGGCAAGATTGGAAGTGCACATCCTTGGATGCGAAGAAGAATACACCACAACTGAGATGACAACGACAGTCACTACTGTAACCACACCAACAACAACTGTCACCGAAGAAACAACCACCTCACGGTCCACAACATCTGAGATTTCAACCACTCCAGGATATTGCCAAGAGGAAATGGACGGCGAAGAGGGTCTTGAGTCTGAAGTGACGGCAGATGGAACACTCACAATTGACGATCAGACCTCCTACGTGACCATACCCGAATTGCCAATCAGCCAGAGCGCAGGCAGTTTCCCAAGTGTGGAGCGCAAATTCCGCCGACGGGTCAGGATCACAGCACTGCGCACCACATTGCGTTCGTCTAGTCAGGCGGGAGAGGGCACAACCACAGCAGTGCCTGCTGCAGGAGAGCAACCCATTGAAATCACTGCCGTAGTGCTGACAAAGAAGCCGGGAGACAACAGCTTTTCTCCACTGATGGACGAATCCACCAACCAGCCCAAGTTGATAACCATTACTCTGAATGGAGATCAACCAGCATCAACTCCCTTGCCCGAAGACGAAGATGCTTTGGATGACGTTACCGAGATGCGCTTGGAGTTCCGCAGTGTCCTCGGTGTTGATGAAATAACGTTTGAGCAACACGTACTGGGTTGTATCAAAGAATACACTACAACTGAGCCAACCACAAGAAGCACTACTGTCACGACAACCCGCATGACCACGACTTCTCCGGCACCAACAACCCAAGGCTACTGTTTGGAAACTTTGAACAGTGAATCCGGACTTCTGTCAAATGTAGAACCCCAGGGCTTGTCAGTGCTAGACGAAAGTCTGGGACTCCTCCAATTGCAAGATCTTCCCATCACCGAGGGAGCAGCAGAGAGCCCTAGCCTAGACAGTACATTCAACAGACGTATCATTGCCAGAGCTATCAGCCTGAGGTTGTTGCCAACTTCCTCCACAACTCCGGCGGGTACTGGTGCAGAGCCGACATCACGTCAACTTAGCTTCACTGTACAGGTCAAGAAACCGGGAGACCAAGAATATTCGCCTTTGCGAGAAGCATCCTCAGATCAAGAAAAGATCTTCCAGGCCAACCTTCTGGAGGACCAGTCTAAGACAGTGCTGCTTCCAAGTGACGATGCAACTCTCCAAGGTGCACTGCAGCTCCGCATTCAGTTCCGAACTGTGTCCGGTGTTGGATCGGCAAGATTGGAAGTGCACATCCTTGGATGCGAAGAAGAATACACCACAACTGAGATGACAACGACAGTCACTACTGTAACCACACCAACAACAACTGTCACCGAAGAAACAACCACCTCACGGTCCACAACATCTGAGATTTCAACCACTCCAGGATACTGCCAAGAGGAAATGGACGGCGAAGAGGGTCTTGAGTCTGAAGTGACGGCAGATGGAACACTCACAATTGACGATCAGACCTCCTACGTGACCATACCCGAATTGCCAATCAGCCAGAGCGCAGGCAGTTTCCCAAGTGTGGAGCGCAAATTCCGCCGACGGGTCAGGATCACAGCACTGCGCACCACATTGCGTTCGTCTAGTCAGGCGGGAGAGGGCACAACCACAGCAGTGCCTGCTGCAGGAGAGCAACCCATTGAAATCACTGCCGTAGTGCTGACAAAGAAGCCGGGAGACAACAGCTTTTCTCCACTGATGGACGAATCCACCAACCAGCCCAAGTTGATAACCATTACTCTGAATGGAGATCAACCAGCATCAACTCCCTTGCCCGAAGACGAAGATGCTTTGGATGACGTTACCGAGATGCGCTTGGAGTTCCGCAGTGTCCTCGGTGTTGATGAAATAACGTTTGAGCAACACGTACTGGGTTGTATCAAAGAATACACTACAACTGAGCCAACCACAAGAAGCACTACTGTCACGACAACCCGCATGACCACGACTTCTCCGGCACCAACAACCCAAGGCTACTGTTTGGAAACTTTGAACAGTGAATCCGGACTTCTGTCAAATGTAGAACCCCAGGGCTTGTCAGTGCTAGACGAAAGTCTGGGACTCCTCCAATTGCAAGATCTTCCCATCACCGAGGGAGCAGCAGAGAGCCCCAGCCTAGACAGTACATTCAACAGACGTATCATTGCCAGAGCTATCAGCCTGAGGTTGTTGCCAACTTCCTCCACAACTCCGGCGGGTACTGGTGCAGAGCCGACATCACGTCAACTTAGCTTCACTGTACAGGTCAAGAAACCGGGAGACCAAGAATATTCGCCTTTGCGAGAAGCATCCTCAGATCAAGAAAAGATCTTCCAGGCCAACCTTCTGGAGGACCAGTCTAAGACAGTGCTGCTTCCAAGTGACGATGCAACTCTCCAAGGTGCACTGCAGCTCCGCATTCAGTTCCGAACTGTGTCCGGTGTTGGATCGGCAAGATTGGAAGTGCACATCCTTGGATGCGAAGAAGAATACACCACAACTGAGATGACAACGACAGTCACTACTGTAACCACACCAACAACAACTGTCACCGAAGAAACAACCACCTCACGGTCCACAACATCTGAGATTTCAACCACTCCAGGATACTGCCAAGAGGAAATGGACGGCGAAGAGGGTCTTGAGTCTGAAGTGACGGCAGATGGAACACTCACAATTGACGATCAGACCTCCTACGTGACCATACCCGAATTGCCAATCAGCCAGCCAAGCGCAGGCAGTTTCCCAAGTGTGGAGCGCAAATTCCGCCGACGGGTCAGGATCACAGCACTGCGCACCACATTGCGTTCGTCTAGTCAGGCGGGAGAGGGCACAACCACAGCAGTGCCTGCTGCAGGAGAGCAACCCATTGAAATCACTGCCGTAGTGCTGACAAAGAAGCCGGGAGACAACAGCTTTTCTCCACTGATGGACGAATCCACCAACCAGCCCAAGTTGATAACCATTACTCTGAATGGAGATCAACCAGCATCAACTCCCTTGCCCGAAGACGAAGATGCTTTGGATGACGTTACCGAGATGCGCTTGGAGTTCCGCAGTGTCCTCGGTGTTGATGAAATAACGTTTGAGCAACACGTACTGGGTTGTATCAAAGAATACACTACAACTGAGCCAACCACAAGAAGCACTACTGTCACGACAACCCGCATGACCACGACTTCTCCGGCACCAACAACCCAAGGCTACTGTTTGGAAACTTTGAACAGTGAATCCGGACTTCTGTCAAATGTAGAACCCCAGGGCTTGTCAGTGCTAGACGAAAGTCTGGGACTCCTCCAATTGCAAGATCTTCCCATCACCGAGGGAGCAGCAGAGAGCCCTAGCCTAGACAGTACATTCAACAGACGTATCATTGCCAGAGCTATCAGCCTGAGGTTGTTGCCAACTTCCTCCACAACTCCGGCGGGTACTGGTGCAGAGCCGACATCACGTCAACTTAGCTTCACTGTACAGGTCAAGAAACCGGGAGACCAAGAATATTCGCCTTTGCGAGAAGCATCCTCAGATCAAGAAAAGCTCTTCCAGGCCAACCTTCTGGAGGACCAGTCTAAGACCGTGCTGCTTCCAAGTGACGATGCAACTCTCCAAGGTGCACTGCAGCTCCGCATTCAGTTCCGAACTGTGTCCGGTGTTGGATCGGCAAGATTGGAAGTGCACATCCTTGGATGCGAAGAAGAATACACCACAACTGAGATGACAACGACAGTCACTACTGTAACCACACCAACAACAACTGTCGCCGAAGAAACAACCACCTCACGGTCCACAACATCTGAGATTTCAACCACTCCAGGATACTGCCAAGAGGAAATGGACGGCGAAGAGGGTCTTGAGTCTGAAGTGACGGCAGATGGAACACTCACAATTGACGATCAGACCTCCTACGTGACCATACCCGAATTGCCAATCAGCCAGAGCGCAGGCAGTTTCCCAAGTGTGGAGCGCAAATTCCGCCGACGGGTCAGGATCACAGCACTGCGCACCACATTGCGTTCGTCTAGTCAGGCGGGAGAGGGCACAACCACAGCAGTGCCTGCTGCAGGAGAGCAACCCATTGAAATCACTGCCGTAGTGCTGACAAAGAAGCCGGGAGACAACAGCTTTTCTCCACTGATGGACGAATCCACCAACCAGCCCAAGTTGATAACCATTACTCTGAATGGAGATCAACCAGCATCAACTCCCTTGCCCGAAGACGAAGATGCTTTGGATGACGTTACCGAGATGCGCTTGGAGTTCCGCAGTGTCCTCGGTGTTGATGAAATAACGTTTGAGCAACACGTACTGGGTTGTATCAAAGAATACACTACAACTGAGCCAACCACAAGAAGCACTACTGTCACGACAACCCGCATGACCACGACTTCTCCGGCACCAACAACCCAAGGCTACTGTTTGGAAACTTTGAACAGTGAATCCGGACTTCTGTCAAATGTAGAACCCCAGGGCTTGTCAGTGCTAGACGAAAGTCTGGGACTCCTCCAATTGCAAGATCTTCCCATCACCGAGGGAGCAGCAGAGAGCCCTAGCCTAGACAGTACATTCAACAGACGTATCATTGCCAGAGCTATCAGCCTGAGGTTGTTGCCAACTTCCTCCACAACTCCGGCGGGTACTGGTGCAGAGCCGACATCACGTCAACTTAGCTTCACTGTACAGGTCAAGAAACCGGGAGACCAAGAATATTCGCCTTTGCGAGAAGCATCCTCAGATCAAGAAAAGCTCTTCCAGGCCAACCTTCTGGAGGACCAGTCTAAGACAGTGCTGCTTCCAAGTGACGATGCAACTCTCCAAGGTGCACTGCAGCTCCGCATTCAGTTCCGAACTGTGTCCGGTGTTGGATCGGCAAGATTGGAAGTGCACATCCTTGGATGCGAAGAAGAATACACCACAACTGAGATGACAACGACAGTCACTACTGTAACCACACCAACAACAACTGTCGCCGAAGAAACAACCACCTCACGGTCCACAACATCTGAGATTTCAACCACTCCAGGATACTGCCAAGAGGAAATGGACGGCGAAGAGGGTCTTGAGTCTGAAGTGACGGCAGATGGAACACTCACAATTGACGATCAGACCTCCTACGTGACCATACCCGAATTGCCAATCAGCCAGAGCGCAGGCAGTTTCCCAAGTGTGGAGCGCAAATTCCGCCGACGGGTCAGGATCACAGCACTGCGCACCACATTGCGTTCGTCTAGTCAGGCGGGAGAGGGCACAACCACAGCAGTGCCTGCTGCAGGAGAGCAACCCATTGAAATCACTGCCGTAGTGCTGACAAAGAAGCCGGGAGACAACAGCTTTTCTCCACTGATGGACGAATCCACCAACCAGCCCAAGTTGATAACCATTACTCTGAATGGAGATCAACCAGCATCAACTCCCTTGCCCGAAGACGAAGATGCTTTGGATGACGTTACCGAGATGCGCTTGGAGTTCCGCAGTGTCCTCGGTGTTGATGAAATAACGTTTGAGCAACACGTACTGGGTTGTATCAAAGAATACACTACAACTGAGCCAACCACAAGAAGCACTACTGTCACGACAACCCGCATGACCACGACTTCTCCGGCACCAACAACCCAAGGCTACTGTTTGGAAACTTTGAACAGTGAATCCGGACTTCTGTCAAATGTAGAACCCCAGGGCTTGTCAGTGCTAGACGAAAGTCTGGGACTCCTCCAATTGCAAGATCTTCCCATCACCGAGGGAGCAGCAGAGAGCCCTAGCCTAGACAGTACATTCAACAGACGTATCATTGCCAGAGCTATCAGCCTGAGGTTGTTGCCAACTTCCTCCACAACTCCGGCGGGTACTGGTGCAGAGCCGACATCACGTCAACTTAGCTTCACTGTACAGGTCAAGAAACCGGGAGACCAAGAATATTCGCCTTTGCGAGAAGCATCCTCAGATCAAGAAAAGCTCTTCCAGGCCAACCTTCTGGAGGACCAGTCTAAGACAGTGCTGCTTCCAAGTGACGATGCAACTCTCCAAGGTGCACTGCAGCTCCGCATTCAGTTCCGAACTGTGTCCGGTGTTGGATCGGCAAGATTGGAAGTGCACATCCTTGGATGCGAAGAAGAATACACCACAACTGAGATGACAACGACAGTCACTACTGTAACCACACCAACAACAACTGTCGCCGAAGAAACAACCACCTCACGGTCCACAACATCTGAGATTTCAACCACTCCAGGATACTGCCAAGAGGAAATGGACGGCGAAGAGGGTCTTGAGTCTGAAGTGACGGCAGATGGAACACTCACAATTGACGATCAGACCTCCTACGTGACCATACCCGAATTGCCAATCAGCCAGAGCGCAGGCAGTTTCCCAAGTGTGGAGCGCAAATTCCGCCGACGGGTCAGGATCACAGCACTGCGCACCACATTGCGTTCGTCTAGTCAGGCGGGAGAGGGCACAACCACAGCAGTGCCTGCTGCAGGAGAGCAACCCATTGAAATCACTGCCGTAGTGCTGACAAAGAAGCCGGGAGACAACAGCTTTTCTCCACTGATGGACGAATCCACCAACCAGCCCAAGTTGATAACCATTACTCTGAATGGAGATCAACCAGCATCAACTCCCTTGCCCGAAGACGAAGATGCTTTGGATGACGTTACCGAGATGCGCTTGGAGTTCCGCAGTGTCCTCGGTGTTGATGAAATAACGTTTGAGCAACACGTACTGGGTTGTATCAAAGAATACACTACAACTGAGCCAACCACAAGAAGCACTACTGTCACGACAACCCGCATGACCACGACTTCTCCGGCACCAACAACCCAAGGCTACTGTTTGGAAACTTTGAACAGTGAATCCGGACTTCTGTCAAATGTAGAACCCCAGGGCTTGTCAGTGCTAGACGAAAGTCTGGGACTCCTCCAATTGCAAGATCTTCCCATCACCGAGGGAGCAGCAGAGAGCCCTAGCCTAGACAGTACATTCAACAGACGTATCATTGCCAGAGCTATCAGCCTGAGGTTGTTGCCAACTTCCTCCACAACTCCGGCGGGTACTGGTGCAGAGCCGACATCACGTCAACTTAGCTTCACTGTACAGGTCAAGAAACCGGGAGACCAAGAATATTCGCCTTTGCGAGAAGCATCCTCAGATCAAGAAAAGATCTTCCAGGCCAACCTTCTGGAGGACCAGTCTAAGACAGTGCTGCTTCCAAGTGACGATGCAACTCTCCAAGGTGCACTGCAGCTCCGCATTCAGTTCCGAACTGTGTCCGGTGTTGGATCGGCAAGATTGGAAGTGCACATCCTTGGATGCGAAGAAGAATACACCACAACTGAGATGACAACGACAGTCACTACTGTAACCACACCAACAACAACTGTCACCGAAGAAACAACCACCTCACGGTCCACAACATCTGAGATTTCAACCACTCCAGGATACTGCCAAGAGGAAATGGACGGCGAAGAGGGTCTTGAGTCTGAAGTGACGGCAGATGGAACACTCACAATTGACGATCAGACCTCCTACGTGACCATACCCGAATTGCCAATCAGCCAGAGCGCAGGCAGTTTCCCAAGTGTGGAGCGCAAATTCCGCCGACGGGTCAGGATCACAGCACTGCGCACCACATTGCGTTCGTCTAGTCAGGCGGGAGAGGGCACAACCACAGCAGTGCCTGCTGCAGGAGAGCAACCCATTGAAATCACTGCCGTAGTGCTGACAAAGAAGCCGGGAGACAACAGCTTTTCTCCACTGATGGACGAATCCACCAACCAGCCCAAGTTGATAACCATTACTCTGAATGGAGATCAACCAGCATCAACTCCCTTGCCCGAAGACGAAGATGCTTTGGATGACGTTACCGAGATGCGCTTGGAGTTCCGCAGTGTCCTCGGTGTTGATGAAATAACGTTTGAGCAACACGTACTGGGTTGTATCAAAGAATACACTACAACTGAGCCAACCACAAGAAGCACTACTGTCACGACAACCCGCATGACCACGACTTCTCCGGCACCAACAACCCAAGGCTACTGTTTGGAAACTTTGAACAGTGAATCCGGACTTCTGTCAAATGTAGAACCCCAGGGCTTGTCAGTGCTAGACGAAAGTCTGGGACTCCTCCAATTGCAAGATCTTCCCATCACCGAGGGAGCAGCAGAGAGCCCTAGCCTAGACAGTACATTCAACAGACGTATCATTGCCAGAGCTATCAGCCTGAGGTTGTTGCCAACTTCCTCCACAACTCCGGCGGGTACTGGTGCAGAGCCGACATCACGTCAACTTAGCTTCACTGTACAGGTCAAGAAACCGGGAGACCAAGAATATTCGCCTTTGCGAGAAGCATCCTCAGATCAAGAAAAGATCTTCCAGGCCAACCTTCTGGAGGACCAGTCTAAGACAGTGCTGCTTCCAAGTGACGATGCAACTCTCCAAGGTGCACTGCAGCTCCGCATTCAGTTCCGAACTGTGTCCGGTGTTGGATCGGCAAGATTGGAAGTGCACATCCTTGGATGCGAAGAAGAATACACCACAACTGAGATGACAACGACAGTCACTACTGTAACCACACCAACAACAACTGTCACCGAAGAAACAACCACCTCACGGTCCACAACATCTGAGATTTCAACCACTCCAGGATACTGCCAAGAGGAAATGGACGGCGAAGAGGGTCTTGAGTCTGAAGTGACGGCAGATGGAACACTCACAATTGACGATCAGACCTCCTACGTGACCATACCCGAATTGCCAATCAGCCAGAGCGCAGGCAGTTTCCCAAGTGTGGAGCGCAAATTCCGCCGACGGGTCAGGATCACAGCACTGCGCACCACATTGCGTTCGTCTAGTCAGGCGGGAGAGGGCACAACCACAGCAGTGCCTGCTGCAGGAGAGCAACCCATTGAAATCACTGCCGTAGTGCTGACAAAGAAGCCGGGAGACAACAGCTTTTCTCCACTGATGGACGAATCCACCAACCAGCCCAAGTTGATAACCATTACTCTGAATGGAGATCAACCAGCATCAACTCCCTTGCCCGAAGACGAAGATGCTTTGGATGACGTTACCGAGATGCGCTTGGAGTTCCGCAGTGTCCTCGGTGTTGATGAAATAACGTTTGAGCAACACGTACTGGGTTGTATCAAAGAATACACTACAACTGAGCCAACCACAAGAAGCACTACTGTCACGACAACCCGCATGACCACGACTTCTCCGGCACCAACAACCCAAGGCTACTGTTTGGAAACTTTGAACAGTGAATCCGGACTTCTGTCAAATGTAGAACCCCAGGGCTTGTCAGTGCTAGACGAAAGTCTGGGACTCCTCCAATTGCAAGATCTTCCCATCACCGAGGGAGCAGCAGAGAGCCCTAGCCTAGACAGTACATTCAACAGACGTATCATTGCCAGAGCTATCAGCCTGAGGTTGTTGCCAACTTCCTCCACAACTCCGGCGGGTACTGGTGCAGAGCCGACATCACGTCAACTTAGCTTCACTGTACAGGTCAAGAAACCGGGAGACCAAGAATATTCGCCTTTGCGAGAAGCATCCTCAGATCAAGAAAAGATCTTCCAGGCCAACCTTCTGGAGGACCAGTCTAAGACAGTGCTGCTTCCAAGTGACGATGCAACTCTCCAAGGTGCACTGCAGCTCCGCATTCAGTTCCGAACTGTGTCCGGTGTTGGATCGGCAAGATTGGAAGTGCACATCCTTGGATGCGAAGAAGAATACACCACAACTGAGATGACAACGACAGTCACTACTGTAACCACACCAACAACAACTGTCGCCGAAGAAACAACCACCTCACGGTCCACAACATCTGAGATTTCAACCACTCCAGGATACTGCCAAGAGGAAATGGACGGCGAAGAGGGTCTTGAGTCTGAAGTGACGGCAGATGGAACACTCACAATTGACGATCAGACCTCCTACGTGACCATACCCGAATTGCCAATCAGCCAGAGCGCAGGCAGTTTCCCAAGTGTGGAGCGCAAATTCCGCCGACGGGTCAGGATCACAGCACTGCGCACCACATTGCGTTCGTCTAGTCAGGCGGGAGAGGGCACAACCACAGCAGTGCCTGCTGCAGGAGAGCAACCCATTGAAATCACTGCCGTAGTGCTGACAAAGAAGCCGGGAGACAACAGCTTTTCTCCACTGATGGACGAATCCACCAACCAGCCCAAGTTGATAACCATTACTCTGAATGGAGATCAACCAGCATCAACTCCCTTGCCCGAAGACGAAGATGCTTTGGATGACGTTACCGAGATGCGCTTGGAGTTCCGCAGTGTCCTCGGTGTTGATGAAATAACGTTTGAGCAACACGTACTGGGTTGTATCAAAGAATACACTACAACTGAGCCAACCACAAGAAGCACTACTGTCACGACAACCCGCATGACCACGACTTCTCCGGCACCAACAACCCAAGGCTACTGTTTGGAAACTTTGAACAGTGAATCCGGACTTCTGTCAAATGTAGAACCCCAGGGCTTGTCAGTGCTAGACGAAAGTCTGGGACTCCTCCAATTGCAAGATCTTCCCATCACCGAGGGAGCAGCAGAGAGCCCTAGCCTAGACAGTACATTCAACAGACGTATCATTGCCAGAGCTATCAGCCTGAGGTTGTTGCCAACTTCCTCCACAACTCCGGCGGGTACTGGTGCAGAGCCGACATCACGTCAACTTAGCTTCACTGTACAGGTCAAGAAACCGGGAGACCAAGAATATTCGCCTTTGCGAGAAGCATCCTCAGATCAAGAAAAGATCTTCCAGGCCAACCTTCTGGAGGACCAGTCTAAGACAGTGCTGCTTCCAAGTGACGATGCAACTCTCCAAGGTGCACTGCAGCTCCGCATTCAGTTCCGAACTGTGTCCGGTGTTGGATCGGCAAGATTGGAAGTGCACATCCTTGGATGCGAAGAAGAATACACCACAACTGAGATGACAACGACAGTCACTACTGTAACCACACCAACAACAACTGTCACCGAAGAAACAACCACCTCACGGTCCACAACATCTGAGATTTCAACCACTCCAGGATACTGCCAAGAGGAAATGGACGGCGAAGAGGGTCTTGAGTCTGAAGTGACGGCAGATGGAACACTCACAATTGACGATCAGACCTCCTACGTGACCATACCCGAATTGCCAATCAGCCAGAGCGCAGGCAGTTTCCCAAGTGTGGAGCGCAAATTCCGCCGACGGGTCAGGATCACAGCACTGCGCACCACATTGCGTTCGTCTAGTCAGGCGGGAGAGGGCACAACCACAGCAGTGCCTGCTGCAGGAGAGCAACCCATTGAAATCACTGCCGTAGTGCTGACAAAGAAGCCGGGAGACAACAGCTTTTCTCCACTGATGGACGAATCCACCAACCAGCCCAAGTTGATAACCATTACTCTGAATGGAGATCAACCAGCATCAACTCCCTTGCCCGAAGACGAAGATGCTTTGGATGACGTTACCGAGATGCGCTTGGAGTTCCGCAGTGTCCTCGGTGTTGATGAAATAACGTTTGAGCAACACGTACTGGGTTGTATCAAAGAATACACTACAACTGAGCCAACCACAAGAAGCACTACTGTCACGACAACCCGCATGACCACGACTTCTCCGGCACCAACAACCCAAGGCTACTGTTTGGAAACTTTGAACAGTGAATCCGGACTTCTGTCAAATGTAGAACCCCAGGGCTTGTCAGTGCTAGACGAAAGTCTGGGACTCCTCCAATTGCAAGATCTTCCCATCACCGAGGGAGCAGCAGAGAGCCCCAGCCTAGACAGTACATTCAACAGACGTATCATTGCCAGAGCTATCAGCCTGAGGTTGTTGCCAACTTCCTCCACAACTCCGGCGGGTACTGGTGCAGAGCCGACATCACGTCAACTTAGCTTCACTGTACAGGTCAAGAAACCGGGAGACCAAGAATATTCGCCTTTGCGAGAAGCATCCTCAGATCAAGAAAAGCTCTTCCAGGCCAACCTTCTGGAGGACCAGTCTAAGACAGTGCTGCTTCCAAGTGACGATGCAACTCTCCAAGGTGCACTGCAGCTCCGCATTCAGTTCCGAACTGTGTCCGGTGTTGGATCGGCAAGATTGGAAGTGCACATCCTTGGATGCGAAGAAGAATACACCACAACTGAGATGACAACGACAGTCACTACTGTAACCACACCAACAACAACTGTCGCCGAAGAAACAACCACCTCACGGTCCACAACATCTGAGATTTCAACCACTCCAGGATACTGCCAAGAGGAAATGGACGGCGAAGAGGGTCTTGAGTCTGAAGTGACGGCAGATGGAACACTCACAATTGGCGATCAGACCTCCTACGTGACCATACCCGAATTGCCAATCAGCCAGAGCGCAGGCAGTTTCCCAAGTGTGGAGCGCAAATTCCGCCGACGGGTCAGGATCACAGCACTGCGCACCACATTGCGTTCGTCTAGTCGAGCGGGAGAGGGCACAACCACAGCAGTGCCTGCTGCAGGAGAGCAACCCATTGAAATCACTGCCGTAGTGCTGACAAAGAAGCCGGGAGACAACAGCTTTTCTCCACTGATGGACGAATCCACCAACCAGCCCAAGTTGATAACCATTACTCTGAATGGAGATCAACCAGCATCAACTCCCTTGCCCGAAGACGAAGATGCTTTGGATGACGTTACCGAGATGCGCTTGGAGTTCCGCAGTGTCCTCGGTGTTGATGAAATAACGTTTGAGCAACACGTACTGGGTTGTATCAAAGAATACACTACAACTGAGCCAACCACAAGAAGCACTACTGTCACGACAACCCGCATGACCACGACTTCTCCAGCACCAACAACCCAAGGCTACTGTTTGGAAACTTTGAACAGTGAATCCGGACTTCTGTCAAATGTAGAACCCCAGGGCTTGTCAGTGCTAGACGAAAGTCTGGGACTCCTCCAATTGCAAGATCTTCCCATCACCGAGGGAGCAGCAGAGAGCCCTAGCCTAGACAGTACATTCAACAGACGTATCATTGCCAGAGCTATCAGCCTGAGGTTGTTGCCAACTTCCTCCACAACTCCGGCGGGTACTGGTGCAGAGCCGACATCACGTCAACTTAGCTTCACTGTACAGGTCAAGAAACCGGGAGACCAAGAATATTCGCCTTTGCGAGAAGCATCCTCAGATCAAGAAAAGCTCTTCCAGGCCAACCTTCTGGAGGACCAGTCTAAGACAGTGCTGCTTCCAAGTGACGATGCAACTCTCCAAGGTGCACTGCAGCTCCGCATTCAGTTCCGAACTGTGTCCGGTGTTGGATCGGCAAGATTGGAAGTGCACATCCTTGGATGCGAAGAAGAATACACCACAACTGAGATGACAACGACAGTCACTACTGTAACCACACCAACAACAACTGTCGCCGAAGAAACAACCACCTCACGGTCCACAACATCTGAGATTTCAACCACTCCAGGATACTGCCAAGAGGAAATGGACGGCGAAGAGGGTCTTGAGTCTGAAGTGACGGCAGATGGAACACTCACAATTGACGATCAGACCTCCTACGTGACCATACCCGAATTGCCAATCAGCCAGAGCGCAGGCAGTTTCCCAAGTGTGGAGCGCAAATTCCGCCGACGGGTCAGGATCACAGCACTGCGCACCACATTGCGTTCGTCTAGTCAGGCGGGAGAGGGCACAACCACAGCAGTGCCTGCTGCAGGAGAGCAACCCATTGAAATCACTGCCGTAGTGCTGACAAAGAAGCTGGGAGACAACAGCTTTTCTCCACTGATGGACGAATCCACCAACCAGCCCAAGTTGATAACCATTACTCTGAATGGAGATCAACCAGCATCAACTCCCTTGCCCGAAGACGAAGATGCTTTGGATGACGTTACCGAGATGCGCTTGGAGTTCCGCAGTGTCCTCGGTGTTGATGAAATAACGTTTGAGCAACACGTACTGGGTTGTATCAAAGAATACACTACAACTGAGCCAACCACAAGAAGCACTACTGTCACGACAACCCGCATGACCACGACTTCTCCGGCACCAACAACCCAAGGCTACTGTTTGGAAACTTTGAACAGTGAATCCGGACTTCTGTCAAATGTAGAACCCCAGGGCTTGTCAGTGCTAGACGAAAGTCTGGGACTCCTCCAATTGCAAGATCTTCCCATCACCGAGGGAGCAGCAGAGAGCCCTAGCCTAGACAGTACATTCAACAGACGTATCATTGCCAGAGCTATCAGCCTGAGGTTGTTGCCAACTTCCTCCACAACTCCGGCGGGTACTGGTTTAGAGCCGACATCACGTCAACTTAGCTTCACTGTACAGGTCAAGAAACCGGGAGACCAAGAATATTCGCCTTTGCGAGAAGCATCCTCAGATCAAGAAAAGCTCTTCCAGGCCAACCTTCTGGAGGACCAGTCTAAGACCGTGCTGCTTCCAAGTGACGATGCAACTCTCCAAGGTGCACTGCAGCTCCGCATTCAGTTCCGAACTGTGTCCGGTGTTGGATCGGCAAGATTGGAAGTGCACATCCTTGGATGCGAAGAAGAATACACCACAACTGAGATGACAACGACAGTCACTACTGTAACCACACCAACAACAACTGTCACCGAAGAAACAACCACCTCACGGTCCACAACATCTGAGATTTCAACCACTCCAGGATACTGCCAAGAGGAAATGGACGGCGAAGAGGGTCTTGAGTCTGAAGTGACGGCAGATGGAACACTCACAATTGACGATCAGACCTCCTACGTGACCATACCCGAATTGCCAATCAGCCAGAGCGCAGGCAGTTTCCCAAGTGTGGAGCGCAAATTCCGCCGACGGGTCAGGATCACAGCACTGCGCACCACATTGCGTTCGTCTAGTCAGGCGGGAGAGGGCACAACCACAGCAGTGCCTGCTGCAGGAGAGCAACCCATTGAAATCACTGCCGTAGTGCTGACAAAGAAGCCGGGAGACAATAGCTTTTCTCCACTGATGGACGAATCCACCAACCAGCCCAAGTTGATAACCATTACTCTGAATGGAGATCAACCAGCATCAACTCCCTTGCCCGAAGACGAAGATGCTTTGGATGACGTTACCGAGATGCGCTTGGAGTTCCGCAGTGTCCTCGGTGTTGATGAAATAACGTTTGAGCAACACGTACTGGGTTGTATCAAAGAATACACTACAACTGAGCCAACCACAAGAAGCACTACTGTCACGACAACCCGCATGACCACGACTTCTCCGGCACCAACAACCCAAGGCTACTGTTTGGAAACTTTGAACAGTGAATCCGGACTTCTGTCAAATGTAGAACCCCAGGGCTTGTCAGTGCTAGACGAAAGTCTGGGACTCCTCCAATTGCAAGATCTTCCCATCACCGAGGGAGCAGCAGAGAGCCCTAGCCTAGACAGTACATTCAACAGACGTATCATTGCCAGAGCTATCAGCCTGAGGTTGTTGCCAACTTCCTCCACAACTCCGGCGGGTACTGGTTTAGAGCCGACATCACGTCAACTTAGCTTCACTGTACAGGTCAAGAAACCGGGAGACCAAGAATATTCGCCTTTGCGAGAAGCATCCTCAGATCAAGAAAAGCTCTTCCAGGCCAACCTTCTGGAGGACCAGTCTAAGACCGTGCTGCTTCCAAGTGACGATGCAACTCTCCAAGGTGCACTGCAGCTCCGCATTCAGTTCCGAACTGTGTCCGGTGTTGGATCGGCAAGATTGGAAGTGCACATCCTTGGATGCGAAGAAGAATACACCACAACTGAGATGACAACGACAGTCACTACTGTAACCACACCAACAACAACTGTCACCGAAGAAACAACCACCTCACGGTCCACAACATCTGAGATTTCAACCACTCCAGGATACTGCCAAGAGGAAATGGACGGCGAAGAGGGTCTTGAGTCTGAAGTGACGGCAGATGGAACACTCACAATTGACGATCAGACCTCCTACGTGACCATACCCGAATTGCCAATCAGCCAGAGCGCAGGCAGTTTCCCAAGTGTGGAGCGCAAATTCCGCCGACGGGTCAGGATCACAGCACTGCGCACCACATTGCGTTCGTCTAGTCAGGCGGGAGAGGGCACCACCACAGCAGTGCCTGCTGCAGGAGAGCAACCCATTGAAATCACTGCCGTAGTGCTGACAAAGAAGCTGGGAGACAACAGCTTTTCTCCACTGATGGACGAATCCACCAACCAGCCCAAGTTGATAACCATTACTCTGAATGGAGATCAACCAGCATCAACTCCCTTGCCCGAAGACGAAGATGCTTTGGATGACGTTACCGAGATGCGCTTGGAGTTCCGCAGTGTCCTCGGTGTTGATGAAATAACGTTTGAGCAACACGTACTGGGTTGTATCAAAGAATACACTACAACTGAGCCAACCACAAGAAGCACTACTGTCACGACAACCCGCATGACCACGACTTCTCCGGCACCAACAACCCAAGGCTACTGTTTGGAAACTTTGAACAGTGAATCCGGACTTCTGTCAAATGTAGAACCCCAGGGCTTGTCAGTGCTAGACGAAAGTCTGGGACTCCTCCAATTGCAAGATCTTCCCATCACCGAGGGAGCAGCAGAGAGCCCTAGCCTAGACAGTACATTCAACAGACGTATCATTGCCAGAGCTATCAGCCTGAGGTTGTTGCCAACTTCCTCCACAACTCCGGCGGGTACTGGTTTAGAGCCGACATCACGTCAACTTAGCTTCACTGTACAGGTCAAGAAACCGGGAGACCAAGAATATTCGCCTTTGCGAGAAGCATCCTCAGATCAAGAAAAGCTCTTCCAGGCCAACCTTCTGGAGGACCAGTCTAAGACCGTGCTGCTTCCAAGTGACGATGCAACTCTCCAAGGTGCACTGCAGCTCCGCATTCAGTTCCGAACTGTGTCCGGTGTTGGATCGGCAAGATTGGAAGTGCACATCCTTGGATGCGAAGAAGAATACACCACAACTGAGATGACAACGACAGTCACTACTGTAACCACACCAACAACAACTGTCACCGAAGAAACAACCACCTCACGGTCCACAACATCTGAGATTTCAACCACTCCAGGATACTGCCAAGAGGAAATGGACGGCGAAGAGGGTCTTGAGTCTGAAGTGACGGCAGATGGAACACTCACAATTGACGATCAGACCTCCTACGTGACCATACCCGAATTGCCAATCAGCCAGAGCGCAGGCAGTTTCCCAAGTGTGGAGCGCAAATTCCGCCGACGGGTCAGGATCACAGCACTGCGCACCACATTGCGTTCGTCTAGTCAGGCGGGAGAGGGCACAACCACAGCAGTGCCTGCTGCAGGAGAGCAACCCATTGAAATCACTGCCGTAGTGCTGACAAAGAAGCCGGGAGACAATAGCTTTTCTCCACTGATGGACGAATCCACCAACCAGCCCAAGTTGATAACCATTACTCTGAATGGAGATCAACCAGCATCAACTCCCTTGCCCGAAGACGAAGATGCTTTGGATGACGTTACCGAGATGCGCTTGGAGTTCCGCAGTGTCCTCGGTGTTGATGAAATAACGTTTGAGCAACACGTACTGGGTTGTATCAAAGAATACACTACAACTGAGCCAACCACAAGAAGCACTACTGTCACGACAACCCGCATGACCACGACTTCTCCGGCACCAACAACCCAAGGCTACTGTTTGGAAACTTTGAACAGTGAATCCGGACTTCTGTCAAATGTAGAACCCCAGGGCTTGTCAGTGCTAGACGAAAGTCTGGGACTCCTCCAATTGCAAGATCTTCCCATCACCGAGGGAGCAGCAGAGAGCCCTAGCCTAGACAGTACATTCAACAGACGTATCATTGCCAGAGCTATCAGCCTGAGGTTGTTGCCAACTTCCTCCACAACTCCGGCGGGTACTGGTGCAGAGCCGACATCACGTCAACTTAGCTTCACTGTACAGGTCAAGAAACCGGGAGACCAAGAATATTCGCCTTTGCGAGAAGCATCCTCAGATCAAGAAAAGCTCTTCCAGGCCAACCTTCTGGAGGACCAGTCTAAGACAGTGCTGCTTCCAAGTGACGATGCAACTCTCCAAGGTGCACTGCAGCTCCGCATTCAGTTCCGAACTGTGTCCGGTGTTGGATCGGCAAGATTGGAAGTGCACATCCTTGGATGCGAAGAAGAATACACCACAACTGAGATGACAACGACAGTCACTACTGTAACCACACCAACAACAACTGTCGCCGAAGAAACAACCACCTCACGGTCCACAACATCTGAGATTTCAACCACTCCAGGATACTGCCAAGAGGAAATGGACGGCGAAGAGGGTCTTGAGTCTGAAGTGACGGCAGATGGAACACTCACAATTGACGATCAGACCTCCTACGTGACCTTACCCGAATTGCCAATCAGCCAGAGCGCAGGCAGTTTCCCAAGTGTGGAGCGCAAATTCCGCCGACGGGTCAGGATCACAACACTGCGCACCACATTGCGTTCGTCTAGTCAGGCGGGAGAGGGCACAACCACAGCAGTGCCTGCTGCAGGAGAGCAACCCATTGAAATCACTGCCGTAGTGCTGACAAAGAAGCCGGGAGACAACAGCTTTTCTCCACTGATGGACGAATCCACCAACCAGCCCAAGTTGATAACCATTACTCTGAATGGAGATCAACCAGCATCAACTCCCTTGCCCGAAGACGAAGATGCTTTGGATGACGTTACCGAGATGCGCTTGGAGTTCCGCAGTGTCCTCGGTGTTGATGAAATAACGTTTGAGCAACACGTACTGGGTTGTATCAAAGAATACACTACAACTGAGCCAACCACAAGAAGCACTACTGTCACGACAACCCGCATGACCACGACTTCTCCGGCACCAACAACCCAAGGCTACTGTTTGGAAACTTTGAACAGTGAATCCGGACTTCTGTCAAATGTAGAACCCCAGGGCTTGTCAGTGCTAGACGAAAGTCTGGGACTCCTCCAATTGCAAGATCTTCCCATCACCGAGGGAGCAGCAGAGAGCCCTAGCCTAGACAGTACATTCAACAGACGTATCATTGCCAGAGCTATCAGCCTGAGGTTGTTGCCAACTTCCTCCACAACTCCGGCGGGTACTGGTGCAGAGCCGACATCACGTGAACTTAGCTTCACTGTACAGGTCAAGAAACCGGGAGACCAAGAATACTCGCCTTTGCGAGAAGGATCCTCAGATCAAGAAAAGATCTTCCAGGCCAACCTTCTGGAGGACAAGTCTAAGACAGTGCTGCTTCCAAGTGACGATGCAACTCTCCAAGGTGCACTGCAGCTCCGCATTCAGTTCCGAACTGTGTCCGGTGTTGGATCGGCAAGATTGGAAGTGCACATCCTTGGATGCGAAGAAGAATACACCACAACTGAGATGACAACGACAGTCACTACTGTAACCACACCAACAACAACTGTCACCGAAGAAACAACCACCTCACGGTCCACAACATCTGAGATTTCAACCACTCCAGGATACTGCCAAGAGGAAATGGACGGCGAAGAGGGTCTTGAGTCTGAAGTGACGGCAGATGGAACACTCACAATTGACGATCAGACATCCTACGTGACCATACCCGAATTGCCAATCAGCCAGAGCGCAGGCAGTTTCCCAAGTGTGGAGCGCAAATTCCGCCGACGGGTCAGGATCACAGCACTGCGCACCACATTGCGTTCGTCTAGTCAGGCGGGAGAGGGCACAACCACAGCAGTGCCTGCTGCAGGAGAGCAACCCATTGAAATCACTGCCGTAGTGCTGACAAAGAAGCCGGGAGACAACAGCTTTTCTCCACTGATGGACGAATCCACCAACCAGCCCAAGTTGATAACCATTACTCTGAATGGAGATCAACCAGCATCAACTCCCTTGCCCGAAGACGAAGATGCTTTGGATGACGTTACCGAGATGCGCTTGGAGTTCCGCAGTGTCCTCGGTGTTGATGAAATAACGTTTGAGCAACACGTACTGGGTTGTATCAAAGAATACACTACAACTGAGCCAACCACAAGAAGCACTACTGTCACGACAACCCGCATGACCACGACTTCTCCGGCACCAACAACCCAAGGCTACTGTTTGGAAACTTTGAACAGTGAATCCGGACTTCTGTCAAATGTAGAACCCCAGGGCTTGTCAGTGCTAGACGAAAGTCTGGGACTCCTCCAATTGCAAGATCTTCCCATCACCGAGGGAGCAGCAGAGAGGCCTAGCCTAGACAGTACATTCAACAGACGTATCATTGCCAGAGCTATCAGCCTGAGGTTGTTGCCAACTTCCTCCACAACTCCGGCGGGTACTGGTGCAGAGCCGACATCACGTCAACTTAGCTTCACTGTACAGGTCAAGAAACCGGGAGACCAAGAATATTCGCCTTTGCGAGAAGCATCCTCAGATCAAGAAAAGATCTTCCAGGCCAACCTTCTGGAGGACCAGTCTAAGACAGTGCTGCTTCCAAGTGACGATGCAACTCTCCAAGGTGCACTGCAGCTCCGCATTCAGTTCCGAACTGTGTCCGGTGTTGGATCGGCAAGATTGGAAGTGCACATCCTTGGATGCGAAGAAGAATACACCACAACTGAGATGACAACGACAGTCACTACTGTAACCACACCAACAACAACTGTCACCGAAGAAACAACCACCTCACGGTCCACAACATCTGAGATTTCAACCACTCCAGGATACTGCCAAGAGGAAATGGACGGCGAAGAGGGTCTTGAGTCTGAAGTGACGGCAGATGGAACACTCACAATTGACGATCAGACCTCCTACGTGACCATACCCGAATTGCCAATCAGCCAGAGCGCAGGCAGTTTCCCAAGTGTGGAGCGCAAATTCCGCGGACGGGTCAGGATCACAGCACTGCGCACCACATTCCGTTCGTCTAGTCAGACGGGAGAGGGCACAACCACAGCAGTGCCTGCTGCAGGAGAGCAACTCATTGAAATCACTGCCGTAGTGCTGACAAAGAAGCCGGGAGACAACAGCTTTTCTCCACTGATGGACGAATCCACCAACCAGCCCAAGTTGATAACCATTACTCTGAATGGAGATCAACCAGCATCAACTCCCTTGCCCGAAGACGAAGATGCTTTGGATGACGTTACCGAGATGCGCTTGGAGTTCCGCAGTGTCCTCGGTGTTGATGAAATAACGTTTGAGCAACACGTACTGGGTTGTATCAAAGAATACACTACAACTGAGCCAACCACAAGAAGCACTACTGTCACGACAACCCGCATGACCACGACTTCTCCGGCACCAACAACCCAAGGCTACTGTTTGGAAACTTTGAACAGTGAATCCGGACTTCTGTCAAATGTAGAACCCCAGGGCTTGTCAGTGCTAGACGAAAGTCTGGGACTCCTCCAATTGCAAGATCTTCCCATCACCGAGGGAGCAGCAGAGAGCCCTAGCCTAGACAGTACATTCAACAGACGTATCATTGCCAGAGCTATCAGCCTGAGGTTGTTGCCAACTTCCTCCACAACTCCGGCGGGTACTGGTGCAGAGCCGACATCACGTCAACTTAGCTTCACTGTACAGGTCAAGAAACCGGGAGACCAAGAATACTCGCCTTTGCGAGAAGGATCCTCAGATCAAGAAAAGCTCTTCCAGGCCAACCTTCTGGAGGACCAGTCTAAGACAGTGCTGCTTCCAAGTGACGATGCAACTCTCCAAGGTGCACTGCAGCTCCGCATTCAGTTCCGAACTGTGTCCGGTGTTGGATCGGCAAGATTGGAAGTGCACATCCTTGGATGCGAAGAAGAATACACCACAACTGAGAAGACAACGACAGTCACTACTGTAACCACACCAACAACTACTGTCACCGAAGAAACAACCACCTCATGGTCCACAACATCTGAGATTTCAACCACTCCAGGACACCCTATAACTGAGCCAACCACAAGAAGCACTACTGTCACGACAACCCGCATGACCACGACTTCTCCGGCACCAACAACCCAAGGCTACTGTTTGGAAACTTTGAACAGTGAATCCGGACTTCTGTCAAATGTAGAACCTCAGGGCTTGTCAGTGCTAGACGAAAGTCAGGGACTCCTCCAATTGGAAGATCTTCCCATCACTGAGGGAGCAGCAGAGAGCCCTAGCCTAGACAGTACATTCAACAGACGTATCATTGCCAGAGCTATCAGCCTGAGATTGTTGCCAACTTCCTCCACAACTCCGGCGGGTACTGGTGCAGAGCCGACATCACGTGAACTTAGCTTCACTGTACAGGTCAAGAAACAGGGAGACCAAGAATATTCGCCTTTGCGAGAAGGATCCTCAGATCAAGAAAAGATCTTCCAGGCCAACCTTCTGGAGGACCAGTCTAAGACAGTGCTGCTTCCAAGTGACGATGCAACTCTCCAAGGTGCACTGCAGCTCCGCATTCAGTTCCGAACTGTGTCCGGTGTTGGATCGGCAAGATTGGAAGTGCACGTCCTTGGATGCGAAGAAGAATACAGCACAACTGAGATGACAACGACAGTCACTACTGTAACCACACCAACAACTGTCACCGAAGAAACAACCACCTCACGGTCCACAACATCTGAGATTTCAACCACTCCAGGATACTGCCAAGAGGAAATGGACGGCGAAGAGGGTCTTGAGTCTGAAGTGACGGCAGATGGAACACTCACAATTGACGATCAGACCTCCTACGTGACCGTACCCGAATTGCCAATCAGCCAGAGCGCAGGCAGTTTCCCAAGTGTGGAGCGCAAATTCCGCCGACGGGTCAGGATCACAGCACTGCGCACCACATTGCGTTCGTCTAGTCAGGCGGAAGAGGGCACAACCACAGCAGTGCCTGCTGCAGGAGAGCAACCCATTGAAATCACTGCCGTAGTGCTGACAAAGAAGCCGGGAGACAACAGCTTTTCTCCACTGATGGACGAATCCACCAACCAGCCCAAGTTGATAACCATTACTCTGAATGGAGATCAACCAGCATCAACTCCCTTGCCCGAAGACGAAGATGCTTTGGATGACGTTACCGAGATGCGCTTGGAGTTCCGCAGTGTCCTCGGTGTTGATGAAATAACATTTGAGCAACACGTACTGGGTTGTATCAAAGAATACACTACAACTGAGCCAACCACAAGAAGCACTATTGTCACGACAACCCGCATGACCACGACTTCTCCGGCACCAACAACCCAAGGCTACTGTTTGGAAACTTTGAACAGTGAATCCGGACTTCTGTCAAATGTAGAACCTCAGGGCTTGTCAGTGCTAGACGAAAGTCAGGGACTCCTCCAATTGCAAGATCTTCCCATCACCGAGGGAGCAGCAGAGAGCCCTAGCCTAGACAGTACATTCAACAGACGTATCATTGCCAGAGCTATCAGCCTGAGGTTGTTGCCAACTTCTTCAATAACTCCGGCGGGTACTGGTGAAGAGCCCATTCCACGTGGACTTAGCTTCACTGTACAGGTCAAGAAACCGGGAGACCAAGAGTTTTCGCCTTTGCGAGAAGCATCCTCAGATCAAGAAAAGATCTTCCAAGCCAATCTTGTTGAGGACCAGTCTATGACAGTGATTCTGCCAAGTGAGGATGAAACTCTGCAAGGTGCACTGCAGCTCCGCATTGAGTTCCGAACTTTTACAGCTGTTGGATCGGCAAGACTAGAAGTGCACATCCTTGGATGCGCAGAAGAATACACCACAACTACAGTAACAACTTCCAGCACAACATTATCAACACCATCTACCACGACTGAAGAAGTTACAACATCAGCAGAGACAACAACTGCAGTAACAACCACCACCGAAGAGATAACTATCGTCAAAAAGACAACACCTGCCAAATCCTCAACACAAGCAACTGAGAGCACAGAAAAGTTGACGACAACCCGAACTCCAAAACCAACAACAACCATGATACCTTCGACTGCACAACCAACGGTTGTCACTACTACCCCAGAGGTTACAACAACTACGCCAGGAGAATGCGATGACGATTTCATTCAAATTGACCAACTTGAAGTTCAGAGGCAAACGTCCAGTGGCGAAATTCTGCAGTCTGGCTCTTCGTGGGAGATAACCTCTCTGCCACTAGCTACACGGCCACTCTCAACAGAAGATGCAGATGACTTAGAGTCACTGATAGTGAAATTCTCGTCACCTGTTCAGTTCTCGAGCATCGTAATAAGTAATCAAGAGGATGATGAATCAATCACTGAGTTTGCACTCAAAGTGAAAGAATCCCCAGATTCACCTTCCGAGTTTCTGATGGACGGAGGGAATGTGCAGATCTTCACAGCCAGTGGAACTGACAAGACACGCTTGCCCGAGTTGCCGCAGTTGAGAGAGATTGAAATAGTTCCAGTAAAGATTGACAGTAGTAGTGATGTGAACAACCTCAATCTTGATCTCTTTGGATGTGCTGAAATAGGTATGTCAAGGTGGAGGTGGTGGTCCAATCTCTCAAAGGACTCCTTCAACACCTGGTCATCAGTTTGTGTTCTCAACTACTCCAACAACTTCAACAATACGTACAacattgccaacgactactctactaccaactaccaccatgcgaccgagtacaacattgccgacaactcgaagtgctccaagtggttctga

>Agib-Sfp13like

ATGGCTAATTTGCCACCGCAATACATCCTGGTTCTACTCCTATTGACCCATTTCTACCCACAGACCACGAAATGCCAGACAACCGACAGTCACTTCTGCCCCCGGGAGGAGGCCGTTGACGTCATCGTGCAGGAGAAGTACCTGGTCGAGGAATGGCAGACCCTGGATATATCACTGCAGAGTTACAAGGATCGTCTGAGAGCTGGAGATAAGATCCGTCTCGTCAGATGCGACGACAACTCCCCCACGTGCGAAGTCCAGGTTGCTGAGTCTGTTGAGCGTACTCGACCCAGACACCAGACGCGTCTTAAAGAGATCAAAGACTGCTGCGAAGGATGGTCTGGAGACAAATGCAACATACCTGTGTGCGCTCCACCATGTCAGGCCGGAGAATGTGTCGCTCCTGACCAATGTGAATGCTACCCGGGTTACGCTGGACTGACATGCGAAAAAGCTATATGCAAGCCAGAATGTGTCAATGGCGTTTGCATCTCCCCCGACGAATGCCAATGCTACCCTGGTTTCAGCGGGACGTCTTGTGAAAAAGGCGCTGTGGTGGACAAGGAACACAAGTGCACGCTGTGTTGCGGCGGCGCCTTCGTGTCATTCGACGGGTTCTTCTACACTTTCCCCACCTCTGGTCTGATCACCTTGGCCTCGTGCGACGACTGCGGCATTGGAGCTTTCGCCATCAAAGTCCACGCAAGTTACCCGTGCGACGAGCAGCAGTGTCACATCTTCAACATAGTCGTCATCTCGTACAGAATTGGCGATCGTGAATTCGAAGTGGAGCTGCTTCCGGATAATGGTGTACGGTACGAGGATCAAGACGTCACCGAGCTGCCACTCATCGTCAACGACTTTGGAACCGTCTCCAAGGACGGAATGCACACGGTCTTCAAGGGTTTCCAAGGAAATGATGTAACAGTCCGTGTTGACGCCAGTGGTGGCATCGACCTGCAAGTGTCCGACCTGTTCCAAGGCGCCATGACCGGCATGTGCGGCAACTTCAATGGCGATGCCGAGGACGACGACGTCTCAGAAGAGGAAGCTCGCGGGTTTGGCATGGTCTTCGACTTCAAGGAATCCTCCAGTACCTGCTGCCAAGGCGTGGACCCACCCATGGCAGAGGCAGCCAACGATCTCTGCGAGGAGATGATGACTGGGGCTGAGGAGGGCTTCAGAGCCTGCCCGGCTGGCGTGAACCCGGCCAAGTACCGCATGCTCTGCCTGTTCACCATGTGTCATTGCCTCCGTGCGGTCGGGGATGCGGCGCCAGGGCCTTGTTTCTACGAAGGGAGGAAGGCCATACTGTGTGACGTCCTGACGCAGTACTCGCGAGACTGTCTGGCTGAAGGAGTCCTACCCGAATGGCGTCGGGATGACTTGTGTCCCATGCAGTGTGAAAACGGCCAAGTGTATACAGACTGCGGCTCTCCCTGTCCCCGAACCTGTGAGAACTTGGACTTCCAGGAAGAATGTGAACAGTACTGTGTCGAAGGCTGCCACTGCCCCACAGCAACGTTCTGGGACCGAACAAAGTGCGTACCGAGGGAAGAATGCCCGTGCACACGAGGATCGGATCTGTTCCCCGCTGGCCACACCATTACGTCTGGCTGTCAACTCTGCACTTGTCTTGGAGGCAGATGGGACTGCACCACCAACGAGTGCAACGCCACATGCAGCGTGTCTGGCGGGCACCACTTCAGAACCTTCGACGGATCCAACTACCTGTTCCCCGCTAGCAGCTTCTGCGAGTACCTCCTGGCGGAGCTCAGCGACCCACAGTTCAGCATCCTGATTGAGTTCGAGGACTGCACGGCGAGCTTACGGTCGTGTCTTATGGTTGTCAGTGTCGTCACACCTGATCGGTCAATCTTTGAACTGAATGGTCAATCGATAAAAGTCACCAATCAGGCAGGACATACCACAGAAAAGCTGCCCTTCCGGACCACATTTCACGACAACTCCGTCCTAGTCGCCCGGCAGGTGACTTCACTCTTCACCCGCTTGACGATTGCAGAGCACGGCATCGACATACTGCTTGGACGAGACAGTCAGCTGTACCTCACACTCAACCCGAGATGGCAAACAAAGGTTCGGGGCCTCTGCGGCACCTACAACAACAAACAGATCGACGACTTCGTGGCCCAGTCCGGTTTGGACGCCAAGGCCAAGATCAACTCCTTCGGCAACTCCTGGAAGATCGGACGCCACTGCCCGGACGTAGAAGAAGACGTGACCCTCCGGCCCTGCGACCTGCACTCCCAGCGGGTACCCCTGGCTGACGGCATCTGTAAGAAGCTCCGAGAGCCCCCGTTCGATCGATGCAACAAGCTGGTGGCAGTGGATAAGTACGAGGAACAGTGCCGAGAGGCCGTCTGCGGCTGCCATGCGAGTGACTTCCAGTGCCAGTGCCTTGCTTTCGCTACCTACGCCCGTGCATGTGCGGCGGCCGGGGAAACGTTTCTCTGGCGAAGCGAACGCACCTGTCcaatgGTGTGTCCAACTGGAGAGATCTACAGAATGTGCGGTTCCAACTGTGTCTTAAGCTGCGGAGAGCTGTCATCGTATCAGGACTGTCAGGAGGA**ATGTGTAGAGGGCTGTCAATGTCCTCATGGCAAGCTTCGTGACATTGGTTCTGGCCAGTGCGTGTTTGTCGAGGACTGTTCCTGCGAGGTTGATGGTGTGGTGTACGAATCCAAGCAATCCTGGAAAAGCGGCTGCAACGAATGCTTCTGTTCTGCCGGAACGTACACGTGCACTGAGAGGGACTGTACCGAATACGAGAGCTGCGCTGCGGGCATGGAGTGGCTTGAGTGCCAAGAATGCGAGAGGAACTGTCAGAACGCCTACCTGCCTTGCGTGCAGACTGTTTGCACCCATGGGTGCGGCTGCCCTGAGGGCAAGGTGCTCCACAAGGGCACCTGCATCCAGGTGGACGAGTGCTCCTGCGACTACAACGGCAAGAGTTACAAGGTGTACGAGAAGGTCGCCATTGAGTGCCATGAGTGCATGTGCAACACAGATCACAGGTGGATATGTGATGACGACACCTGTCCATCTACATGCAGCTCATATGGCGAGTCAAACTTCATAACATTCGACATGAGAAGATACAAATTCCAAGGTGACTGTGAGTACACTCTGGTGGAAGACTTCTGCGGAGAATCCGAAGGTTCCTTTCGCGTCCTCATCGAGAACATCCCCTGTGGTGAAGGCGGTGTGACCTGCACCAAGGCGGTCAAGTTCATGCTGTATGACACCACGATACACCTCGTGCGAGGCAGTCCTTACACCGTCACAAGGAACCCTGACATCAGCGTGCAGGCGCGGTTTAAAGTGGAAGAAGCTGGACTCTATCTTATCATCAAAACACCCGATGGTATCACCCTGAAGTGGGACTACGGGACCAGCGTACACGTGACCCTTGACCCGCTGCTGGCTGGCCAAGTCTGCGGTTTGTGCGGCGACTTCAACGGCGACGCCAACGACGACTTCAAGTCCCGCAATCGTGAGATCGAGGCCCTGGCCCACGTCTTCGGCCACAGCTGGCGGTCGGTGCAGAACTGCGCCGTGCCCAAGGAGCTACTGCACACGTGCGAAACCGCGCCTCACCGCAAACCGTGGGCAGAGAATGTCTGCGGCATCATCAAGAAGTCGGTGTTTGCCTCATGCCAAAATCTGGTCGATCCTGAGCCCTACTTCCACGCATGCGTGCAAGATACATGCGCATGTGACCGGGGTGCCGACTGTGAGTGCATGTGCACAGCCATCGCAGCCTACGCCATGGCGTGTAACGAGAACAATGTTGCCGTGGCTTGGCGGTCGGATGGATACTGCGCATTGCAGTGCGAGAACGGGAGGAAGTACCAGGCCTGCGGCAAAGTCTGCCCCGACCAGTGCTACCCGTCCAACGCCGACGAGGACTACGGCTGCGAAACCCACTGCGTGGAGGGCTGCCACTGCCCAGAGGGTCAGGTGCTGTTCCGTGACAGGTGTATCGAGAGACAACTGTGTCCCTGCTTCATCGACAGCGGCCGAGAGGAGATCAAACACGGCGCACTGGTTGTCCACGATTGTATGCAGTGCATGTGCAACGGAGGACATTTGGAATGCTCAGGAACAAACTGCACAGAGAAAGCTATAATGGCCACCAAGAAGCCATGCGGCCACAAGCCTCCCCAGACCTGTACCTGCGCACCAGGTTTCACCTGT**TGCACAGACAAGGCCTTCTGCATTGAGGACAGCAAATTCTGCGACGGTGAATACAACTGCAATGACCTCTCAGACGAAATCCACTGTGACTGTGTCTACAAAGGCATCACCTACTCATCTGGAGACACCTGGAGTGGTGAGAGAGCGTGTGAAGTCTGCAAGTGTGAAGCAGGGCGCACGACTTGCCTCAAGGAATGCAGTCTGAAGTGCGACATTGTAAAAGAGTGGCCACTACTACAGCTGGTGGTGCTGGTGGCTCAGATGTTGAAACAACGACACGGGCGACACGGCCGACACGCCCTGGTCCTGGAAGCTCTGATGTTGAAACAACCACACGGCGGACACGGCCGACACGGCCAACTCGCCCTGAACTTTCAACCACTACTCCTGCGCAAACCACAACGAAAGccactggttcaggagacgaccctgaatggtgatcgacctgtgactctcatcttggcctctcccgtgaccggcattaaagaactgcgacttgagatcctgtccattggggacagcaacgagggaagcttgcgtgttgatttcctgggatgcaaagaagaagtgtctaccactactcctgcggcaacaacaacgaaagttgtgaccacaaccactcagacgtccacgtccacgacggcaggatactgtatggagccaatggacggagaccaaggtcttgagggtggccgctctaagagcccagactctgaagaaatccgattcatcctgtcggtacgggatagcaccactcaaaccttccgtgatgtgctggactcttctggtcagccactggttcaggagacgaccctgaatggtgatcgacctgtgactctcatcttggcctctcccgtgaccggcattaaagaactgcgacttgagatcctgtccattggggacagcaacgagggaagcttgcgtgttgatttcctgggatgcaaagaagaagtgtctaccactactcctgcggcaacaacaacgaaagttgtgaccacaaccactcagacgtccacgtccacgacggcaggatactgtatggagccaatggacggagaccaaggtcttgagggtggccgctctaagagcccagactctgaagaaatccgattcatcctgtcggtacgggatagcaccactcaaaccttccgtgatgtgctggactcttctggtcagccactggttcaggagacgaccctgaatggtgatcgacctgtgactctcatcttggcctctcccgtgaccggcattaaagaactgcgacttgagatcctgtccattggggacagcaacgagggaagcttgcgtgttgatttcctgggatgcaaagaagaagtgtctaccactactcctgcggcaacaacaacgaaagttgtgaccacaaccactcagacgtccacgtccacgacggcaggatactgtatggagccaatggacggagaccaaggtcttgagggtggccgctctaagagcccagactctgaagAAGTGCCAACCACTACTCCTGCCGCAACCAGAGGTAAGCTGTGA

>Agib-trypsin Sfp (g20573.t1)

ATGAAAGTTCTCATCTTCCTTGCTTGCCTTTCTCTGGCATGTGCATACCACTTTAAAGGCATGCCGGCTGATCGGCTGATCGTGGGAGGCAGCGAGGTGAATCCTCCCCATAGTCGTCCCTGGCAGGTGGCGCTCTTCAGCAGCTCAAGTGGCGGGTTTAACTCTCAATACTGTGGTGGCACCCTGGTGCACAGCAAATGGGTGGTGTCAGCTGCCCACTGTGCCGGGGGCTCGGTGTATGCTGGACTTGGTTTCCATGACCTCAATGAGAGCGGTAATCAGATTATCAAGGGTTCTTGGATAAAACACAGTAGCTACAACTCGGGCACGCTGGACAACGACATTGCTCTGATCAAATTGAGTTCGTCTGCGTCACTCAACAGCAATGTGAAAACCATCGGCATTGCATCAGCTAACTCTGATGTGTCGTCGGGTACCAGTCTGCTGGTCAGCGGCTGGGGTTCCACGTCATCCGGTGGTGCCTATCCTACTAAACTTCGGGAGGTTGTGGTGAAGGCAGTAAGCCGTAGCAGTTGCAACAGCGACTACGGTGGTAGTATCACCAACAACATGATCTGTGCTGCGGCATCGGGCAAGGACTCCTGCCAGGGTGACAGCGGCGGCCCAATCGTCAGCAACTACGGTAGTGTCAGCAGTACTACACTGTCCGGCATTGTGAGCTGGGGCTATGGTTGTGCTGACTCCAGATATCCCGGAGTTTACACTCGTGTGGCTAACTACTGTTCCTGGATCGCTTCGAAATCGTCGAATGCCGTCAGATGCTAA

**List of predicted full length Arub-Sfp protein sequences (formerly partial and/or incomplete)**

**>Arub-Sfp4**

MGRFCFDIAFCSLVCLFLAIYSVDGYSISRGGSGSQESTKGSGGSSTGGSHEQHAPSPQPCDSHPCQHGGICHNHGTTYECVCPSGCSGARCELENKLLDTIKGATGSGSSQTYPDHVNSKSNSGSNEVPALGDTQNPTKSASKESRPSSSGSSSHTDPDHVNSKPSSESNEVPAPNPQPCDSHPCQHGGVCQNKGQLFECVCPSGCSGRRCENGPVQDPCANNPCEHGGACSPYGSSYRCSCPSAYMGSRCQLGKTQNPTKSASKESGHSSHGSSSHEDPDHVKPKSNSGSNEVPALGDTQNPTKSASKENRPSSPGSSSHTDPDHVNSKSGDESNEVPAPNPQPCDSHPCQHGGVCQNKGQLFECVCPSGCSGRRCENGPVQDPCANNPCEHGGACSPYGSSYRCSCPSAYMGSRCQLGKTQNPTKSASKESGHSSHGSSSHEDPDHVKPKSNSGSNEVPALGDTQNPTKSASKENRPSSPGSSSHTDPDHVNSKPSSESNEVPALGDTHIPTKSASKESRPSSPGSSSHKDPDHVNSKSGDESNEVPAPNPQPCDSHPCQHGGVCQNKGQLFECVCPSGCSGRRCENGPVQDPCANNPCEHGGACSPYGSSYRCSCPSAYMGSRCQLGKTQNPTKSASKESGHSSHGSSSHEDPDHVKPKSNSGSNEVPALGDTQNPTKSASKENRPSSPGSSSHTDPDHVNSKPSSESNEVPALGDTHIPTKSASKESRPSSPGSSSHKDPDHVNSKSGDESNEVPAPNPQPCDSHPCQHGGVCQNKGQLFECVCPSGCSGRRCENGPVQDPCANNPCEHGGACSPYGSSYRCSCPSAYMGSRCQLGKTQNPTKSASKESGHSSHGSSSHEDPDHVKPKSNSGSNEVPALGDTQNPTKSASKENRPSSPGSSSHTDPDHVNSKPSSASNEVPALGDTHIPTKSASKERRPSSPGSSPGSSSHTDPDHANSKSNSGSNEVPALGDTQNPTKSASKENRPSSPGSSSHTDPDHVNSKPSSESNEVPALGDTHIPTKYASKESRPSSPGSSSHKDPDHVNSKPSSASNEVPALGDTQNPTKSASKENRPSSPGSSSHTDPDHVNSKSSDESNEVPGPVQDPCANNPCEHGGACSPYGSSYRCSCPSAYMGSRCQLGKTQNPTKSASKESGPSSHGSSSHEDPDHVEPKSKSGSNEVPALGDTHIPTKSASKERRPSSPGSSPGSSSHKDHDHANSKSNSGSNEVPALGDTQNPTKSASKESRHSSPGSSSHTDPDHVNSKPSSESNEVPALGDTQNPTKSASKENRPSSPGSSSHTDPDHVNSKSSDESNEVPAPKPQPCDSHPCQHGGVCQNKGQLFECVCPSGCSGRRCENGPVQDPCANNPCEHGGACSPYGSSYRCSCPSAYMGSRCQLGKTQNPTKSASKESGHSSHGSSSHEDPDHVKPKSNSGSNEVPALGDTQNPTKSASKENRPSSPGSSSHTDPDHVNSHASGSKSGSGSGRGSGSNERRGYYRSPCEKNPCKRGSCKEFGKTFKCKCPSGFKGRRCQYTKRPRTTHTHGSKSSGSSSSAEIEAPQPCDYNPCWNGGTCLPEGDPYTCNCAPGYEGRRCEIAPTPHPCEQDPCSGHGKCYSTRDGGYRCECDPNYGGERCNEVIPVNPCDRNPCKNDGRCLTRGDDYQCHCMFPYEGTNCEQVQPGPCEDSPCTNGGTCFPDGQDFFCQCPKQFEGRRCEIALKVGPCQTEPCFNGGTCTPTATDFECACKPSYTGKRCEDSPDVNDHVILESTNGEMEDVDIPLLAFYTHSSYLLRFSVMCYDSVRIGFKSAVYSHVYYYVYLGKTSARIEHCENTCQSVSEVDISGQLSATAFADYYIRFTSTGSLIVGILDASFTELMSFNGEPPTCPLLVFVSSGDGYMATWKIYEAITEQVNTITWRTVNVNLRSDQYTYLGESFQVYDRQLRLGLAIDSEVTVLLSKGYDDANNYEIVFRAAGNTKLQIKKNGEVVKEGDCVVNSSSLDDFEDFWISFAKSTISVGRVGLDMQPAFVSWSDTSSLEVSLAAFKGASSSYLVYYKFEYQTARGIFWTFDCDMAYPLPFEKIKMPQTALEIGLTADCDAHFSIAATDEDSPDAPMYEVVIGAEDNTKCLIRKCKECECMAEVDCPHILDKNKQVDFTFEFEFGHLKLFKGKGASKSAQPIMSCEDPEPLIGLEYLALSTGFESDGESHWRTYNV

**>Arub-Sfp5**

MAKITLLVVLLVSVLPAIARKDQSYKCNFLESNGDGAYVFDDKQLNGGKFSVSFNVIANRDVRIALSPIKEEHNSMIVISIGGPNNDDSTIGKSDGTILSEYLMTTGSRESELQCLTTCMNNYWICYEDNMLNVGRGGEIEPFLKYSVDAASSFDPGYVGFSTGSGVGMFGNIQAYESCADRQENPTMTSTLQPRSCATIDCGDVTCEWGFKKNAEGCMTCECKTSPCSGLTCSETCANGYEVDDHGCFTCDCKSGPCDSQPCQNDGYCVSEDADEYRCICVNGFTGTNCERDEVPPTIECPANMEFNTDQGSAFATVTYELPEASDNDGEPSIECIPDFLTLGIGANTIKCKAVDAAGNEASCEYTITVKHAQMDVPTDEGLPTSSFDLENPTATDNDGGEPSVVCTADNSPMVLGENTITCTATDSGGLSVECSYTITVKNAYLRTETLNDRSPTNIYEEPPKMTCPVDMDVPTDEGLPTSSFDLENPTATDNDGGEPSVVCTADNSPMVLGENTITCTATDSAGLSVECSYTITVKDEEPPKMTCPVDMDVPTDEGLPTSSFDLENPTATDNDGGEPSVVCTADNSPMVLGENTITCTATDSGGLSVECSYTITVKDEEPPKMTCPVDMDVPTDEGLPTSSFDLENPTATDNDGGEPSVVCTADNSPMVLGENTITCTATDSGGLSVECSYTITVKDEEPPKMTCPVDMDVPTDEGLPTSSFDLENPTATDNDGGEPSVVCTADNSPMVLGENTITCTATDSGGLSVECSYTITVKDEEPPKMTCPVDMDVPTDEGLPTSSFDLENPTATDNDGGEPSVVCTADNSPMVLGENTITCTATDSGGLSVECSYTITVKDEEPPKMTCPVDMDVPTDEGLPTSSFDWENPTATDNDGGEPSVVCTADNSPMVLGENTITCTATDSGGLSVECSYTITVKDEEPPKMTCPVDMDVPTDEGLPTSSFDWENPTATDNDGGEPSVVCTADNSPMVLGENTITCTATDSGGLSVECSYTITVKDEEPPKMTCPVDMDVPTDEGLPTSSFDLENPTATDNDGGEPSVVCTADNSPMVLGENTITCTATDSGGLSVECSYTITVKDEEPPKMTCPVDMDVPTDEGLPTSSFDLENPTATDNDGGEPSVVCTADNSPMVLGENTITCTATDSGGLSVECSYTITVKDEEPPKMTCPVDMDVPTDEGLPTSSFDWENPTATDNDGGEPSVVCTADNSPMVLGENTITCTATDSGGLSVECSYTITVKDEEPPKMTCPVDMDVPTDEGLPTSSFDWENPTATDNDGGEPSVVCTADNSPMVLGENTITCTATDSGGLSVECSYTITVKDEEPPKMTCPVDMDVPTDEGLPTSSFDLENPTASDNDGGEPSVVCTADNSPMVLGENTITCTATDSGGLSVECSYTVTVKDEEPPTVECQGDMTVSVPSNALWVIPTAVDNDGSNVAVTCNPSNPASMVYTNGANVITCEALDTAGNRGECSFTIIMVPEECRFPTLSNDVNKYVACATPLTADGLSKICYRLAEANDYNVFISIWNEQSETGFMPGMIDLVHHLSKDMVGGDTTASGPVSGTKSTPGFGDGEQSMCITRFPSSVVISFNDEELWTVPFEPEEETEIGFASSDDAEWIVQPSYGPQGASRRRRSVAEEPNSLKKVTTRRRRAAGSLRSGGGPGWGDQSDENGLLRVMFNKVNRRRR

**>Arub-Sfp7**

MFQLLLLIMVTVPASSLVQSDVADMTCGVIRETGHSEEFMWDLPQLHNDPVVVEFSVYAKSEVYLALTDEPGPNLPAKATVYYIVIGGDGNTASYISRCRGCQPLTPASTEVLQCDRLNNYWLHFEDGFIKLGLRGKLEPITTYEVPEKDFQPRYLGYSSNMLSQGMFTFSFDKFGYHTYSEHVYYTGEAFCLDWFLKEIPVGVKQFCFQAQVEQGPIYVVLSPQRFRNPGEIAYEIVIGEEENSKTFVFDKVRSGEQAIKEVFTPSVLNPNSFVEYCFTFNEKVITFGPASRRDLVVWVRDESIQIKHVGFAGSKKPAQFLFPVDFIPSYYQGVIDLPPESPAGSDKCLEKPCAENGKCYVDHSFSHGYRCECSNGYTGKNCDILPPETVPAVEESAVKSTKAPEKRPTPKPDTTPPTIDCNVELGDNYVTSADSKTMQVPFSFPRAEDNADKNPYVVCVPSSNSEFPLGTSTVKCTATDKSGNEATCDFEVEVRNSCANNPCGLHGTCVVEVFEPSQFNCVCTDDYEGKLCQEAPQVDEEEEFTEEEFGEEDTTPPTIDCNVELDDNYVVSADSQMMQVPFSYPEATDNSGVNPSVVCVPTYNSEFAVGSSTVKCTATDESGNGATCDLIVVVKNSCENNPCGLHGTCVVDVIEPSEFNCVCTDDYEGDLCTTAPEVDDELEIELSDYKTTKAPKRRTTTPLPDTVAPKVTCPVDMSEQIDDGNSRKRLTWDVSAIDDVDGDVDVKCNPRSGSRFKIGTKEVQCYAVDGAGNRGECTFEVKVEDTTPPTIDCSVDMEDNYVTSVDSQTMQVPFSFPRAKDNSRGKPNVVCVPSSNSEFPLGTSTVKCTATDESGNEATCDLVVEVKNSCENNPCGLHGTCVVDVFQPSEFNCVCIDDYEGELCTKAPKVDEEEYFFEEEPLVEESDVKSSTKAPGRSSTTPKPPKPDVDEGETFTTSGDSSQEIKRTLDTKVISAFEISPFDDKVSKEFQIGCEIGEFKLDVNSETFSLKNGKGEVVDSETTPETSGSLKFSIEITESAFIISYILDQDFTTLIEYSPPGREDGMELNCKAFTVKNVDKRRQRGCQIKYTKITQHKWRSYHRKPRRTRTRNIEKGETYVRKTSDEKTRQRRPRTDRTKTRTIEKGVSERKKSSSGSNSGSSSEENKAISVGDTQVLPTNGQTSGQRRRPRTDRSKTRTIEKGVSERKKSSSGSNSGSSSEENKAISVGDTQVLPTNGQTSGQRRRPRTDRSKTRTIEKGVSERKKSSSGSNSGSSSEENKAISVGDTQVLPTNGQTSGQRRRPRTDRSKTRTIEKGVSERKKSSSGSNSGSSSEENKAISVGDTQVLPTNGQTSGQRRRPRTDRSKTRTIEKGVSEHKKSSSGSNSGSSSEENKAISVGDTQVLPTNGQTSGKRRRPRTDRTKTRTIEKGVSGRQKSGSRSSSGSSSEEKNAISVGATVNKNTDVTTRRRTPAAKVKSSSATLVSGDTEQVDWTQKKFEVNFEDRVEDFLDLTFQDGKVLRIDVIRTKMSIKDESGKELNSESLQGKVRDNRLVFTIFLITGGVEIKLEGEQRVFLEYVTQGRKSKCTRVRETYTRTKSTGQSSDRRTRSDTYVKTSSQRLRQRRRGEGSSGRSSGSTSGSSSEEKKAISVGATVNKNTGVTTRRRAPAASSSATLVSGDTEQVDWTLKKFEVNFEDRVEDFLDLTFQDGKVLRIDVIRTKMSIKDESGKELNSESLQGKVRDNRLVFTIFLITGGVQIKLEGEQRVFLEYVTQGRKSKCTRVRETYTRTKSTVQQGSRRRVYSRQRGGEGGSGSRGGSNSGSSSEENKAISVGATVNKNTDVSTRRRTPAATVQSSSATLVPGEMQQVDWTQKKYEVNFVDKIEDILDLTFQDGSVLTIDVTRTRMAIKDQSGKELKSESLRGKVRDNRLVFTIYLITGGVKIKLEGGQQTFLEYVKAGRTSKCNRVRESYKS

**>Arub-Sfp12**

MDGEEGLQKGFTPTSDLITLQVENGTTYIKFESLPLEVGDNNLPSVDGILTRSASIRAISIRLVPSSSSSTPSPTGNEELVSVTINFFTKKERNDDFKPLLLEDNQEPKVITFTPVSDQPLQKFLKIGNEVIEGVVAFRVTVLEVTGVSSATLELHVLGCAEEFTTTQVTTTAVSVTTPTTTTEESTSTVAVTTPTQTTTERTTTSTTSLVSTTEGYCLQNMDSESGVETKDQTRGNLLTDESGFLTFYELPIEQSVGNSAVLERKFNSNINVRGVLITLKKITSSVTSGQAEGMTTPKTGSTSPQSVKFTFTLLAKRVDETDFKQVVIKNTITEFTLTIEGIQSEVKVFTEDEPSLQGITELQIKFIDVSGVSGASFELTVLGCAEEVSTTTQTTTSSTVSTTTPQLSTTPGYCLENMDGEEGLQEGFTPTSDLITLQVENGTTYIKFESLPLEVGDNNLPSVDGILTRSASIRAISIRLVPSSSSSTPSPTGNEELVSVTINFFTKKERNDDFKPLLLEDNQEPKVITFTPVSDQPLQKFLKIGNEVIEGVVAFRVTVLEVTGVSSATLELHVLGCAEEFTTTQVTTTAVSVTTPTTTTEESTSTVAVTTPTQTTTERTTTSTTSLVSTTEGYCLQNMDSESGVETKDQTRGNLLTDESGFLTFSELPIEQSVGNSAVLERKFNSNINVRGVLITLKKITSSVTSGQAEGMTTPETGSTSPQSVKFTFTLLAKRVDETDFKQVVIKNTITEFTLTIEGIQSEVKVFTEDEPSLQGITELQIKFIDVSGVSGASFELTVLGCAEEVSTTTQTTTSSTVSTTTPQLSTTPGYCLENMDGEEGLQEGFTPTSDLITLQVENGTTYIKFESLPLEVGDNNLPSVDGILTRSASIRAISIRLVPSSSSSTPSPTGNEELVSVTINFFTKKERNDDFKPLLLEDNQEPKVITFTPVSDQPLQKFLKIGNEVIEGVVAFRVTVLEVTGVSSATLELHVLGCAEEFTTTQVTTTAVSVTTPTTTTEESTSTVAVTTPTQTTTERTTTSTTSLVSTTEGYCLQNMDSESGVETKDQTRGNLLTDESGFLTFSELPIEQSVGNSAVLERKFNSNINVRGVLITLKKITSSVTSGQAEGMTTPETGSTSPQSVKFTFTLLAKRVDETDFKQVVIKNTITEFTLTIEGIQSEVKVFTEDEPSLQGITELQIKFIDVSGVSGASFELTVLGCAEEVSTTTQTTTSSTVSTTTPQLSTTPGYCLENMDGEEGLQEGFTPTSDLITLQVENGTTYIKFDSLPLEEGDNNLPSVDGILTRSASIRAISIRLVPSSSSSTPSPTGNEELVSVTINFFTKKETDDDFKPLLLEESKVITFTPVSDQPLQKFLKPGKDTIEGVMAFRVTVLEVTGVSSATLELHVLGCAEVTTMIPSSENPTTETTIPEVTTTTPEVCVEEVALIENLVVVMETSSGDTLSKGTWDIGDLPQTIPTLVSDIEGLPSLKVKFSSPVKLTYLIINGQMESGSTLEFAIKTKYYPGSNSILLSDGENVRTFIIELNGRLNLPLEREVEEVELVPLRYNKSTDTLPPVKVAFLGCAEIVSTTVTATTMTTPTSTEETISITTTTTKPAETTTKQTTITQAMSSTAFIANNTCNNSKTNYNIANDTFNHNCKTNYNNANNTCNHNCKTNYNIANNTCNHNCKTNYNVANNTCNHNCKTNNNVANNTCNHNYKTNYNVANNTCNHNCKTNYNVANNTCNHNCKTNYNVANNTCNHNYKTNYNVANNTCNHNCKTNNNVANHTCNHNCKTNYNVANNTCNHNCKTNYNVANNTCNHNCKTNYNIANNTCNHNCKTNYNIANNTCNHNCKTNNNVANHNCKTNYNIANNTCNHNCKTNYNVANNTCNHNCKTNYNVANNTCNHNCKTNNNVANHNCKTNNNVANNTCNHNCKTNYNVANNTCCHNCKTNYNIANNTCSHNCKTNYNVANNTCNHNCKTNYNIANNTCNHNCKTNYNIANNTCNHNCKTNYNVANNTCSHNYKTNYNVANNTCNHNCKTNYNVANNTCSHNCRTNYNVANNTCNHNCRTNYNIANNTCSHNYKTNYSIANNTCSHNCKTNYNVANNTCNHNCKTNYNIANNTCNHNCKTNYNVANNTCNHNCKTNYNIANNTCNNFRSVEL

**>Arub-Sfp13**

MEEQVVCMLEFKTSAEVSCAPVLVTKLNAQGSIKVSTGDISQSQKLPFEMKLKDGSTLIARQVSSIFSRMTIADLGIDIQLGLDKRIYVTLNPSLQGKVSGLCGNYNNKQIDDFTTSSGVNAKANINKFGNSWKVSLHCGDVEEKNLRPCDLKSQQRPLAEEICRKLREEPFASCNQEIPVDKYVEQCEQDVCGCPPSDKECQCLAFATYARECSVAGFDFLWRGLHNCPIKCPVGQVYKMCGSNCHVNCKDFLTQQPCHEECVEGCQCPEDKVRDDESGQCVKVDYCPCIVDGIVYQSHQSWKKGCNDCFCSSGTHTCTELDCSTYETCADGMEWIPCLQCERTCQSANKACSIRSGCTPGCGCPKGLVLHKGSCIDVSDCTCEYNDKSYKPFDTTAMDCHTCMCHTDYRWICDEDQCPSTCRSYGESHFQTLDAKWYSFQGNCEYTLVENFCGGSNVEGFFRVTIENVPCGRNGVTCTKAVKFTLHDTTIHLVRGAEYTVAKDPRVTTKARFKMEDAGLFLVIKTAEGILLKWDYGTSVLVTLDPSHAGQVCGLCGNFNGDSSDDFYTRSGAMESSPQLFGRSWRTSENCPDPKELTLPCKSEPHRRAWAESVCSIIKKSIFASCHNLVDSEPFFQACVSDTCFCDRGADCECMCTAVTAYATACNENNVAIAWRAEGYCPLQCESGRVYQACGKICPDKCYPSHAEQNYGCEERCVEGCHCPEGTVLFRDECIERKLCPCFINNGQEEIRHGALVVEDCMQCMCNGGHLECTGRNCTESVVAETTTPCAHKTKQCSCAPNFSCCADKSVCIHDSKFCDGEYNCKDFSDEVHCNCIYNDIVYLTGDNWPGVGACEECKCEAGKTTCYKKCQLTCEFPEILNLYEDDDRKCCSCEGGEDTVRRTTTPPRTRPPRSPPTTTQSTTQECVDPFVVGEPTCCQYLDVCAINTKFSGSENCNACREPLVFNGTDCVRPNECLCKDKVGYHLPGDTWENTEKACSVCTCFNNNIECSDVMCDDTMLDCSKYGEVFAYGACEECTCLDEIVCVKSECKLTLEDCEEGEVVFPIGDSCCECRAIETTTIVPTTTLPACVAPFVYRESCERHVMCETLGDDTNEVNCEEGCFCPEGKLMSEKECIPSHQCPCTDIFGIKREFEEMWAQSDCQQCVCYENMTIHCTKECDLKCDESEEVLVNPDGSMCCYCEPIPETTTMFIPETTTATTTPSGECFGCYDDKSDTCHAVDTSWKDDVCTSCECKYKNEFIMNCEHMQCGKDLECKEGHVLVKDDQECCYHCVPDICVGDFNCNSTFCIPNKWVCDGNMDCANEYDEENCPLPPTLPPPSPACAKTEERAFCKDCRERVCHDMECFEMPQELCCECKQGTVYNGTQCVHPKECQCLDENGNIRLPFDKWETADCQECKCHYNRITCYETGLCHSTTPSTSTLPPRPYYCTETCTCNLDCEGDFIDEKCLFAVPQECNDTCLCLPPMKKDDVAGRSCIYQPSQEECIKATTDATTTRELHPISFIEKQIEIGKEKQGKRLQPGSSTPYHL
